# Supplementary material for: A cross-conjugation approach for high-performance diaryl-hemithioindigo photoswitches
Source: Royal Society of Chemistry journal article supplement (doi:10.1039/d2sc06939c), 2023-01-01
Supplement: d2sc06939c1.xlsx [file d2sc06939c1.xlsx]

## Sheet: Tabelle1
	Natural Charge Analysis
			HTI 8										HTI 3
			E-isomer					Z-isomer					E-isomer					Z-isomer
			E-isomer					Z-isomer					E-isomer					Z-isomer
			Atom	No	Natural Charge			Atom	No	Natural Charge			Atom	No	Natural Charge			Atom	No	Natural Charge
			C	1	-0.25698			S	1	0.32344			C	1	-0.21672			S	1	0.31598
			C	2	0.09491			O	2	-0.57155			C	2	-0.15907			O	2	-0.57483
			N	3	-0.48927			N	3	-0.48974			C	3	-0.22881			N	3	-0.42131
			C	4	0.11762			N	4	-0.41868			C	4	-0.12446			C	4	-0.01348
			C	5	-0.19621			N	5	-0.35348			C	5	-0.16562			C	5	-0.14678
			C	6	-0.10618			C	6	0.02446			C	6	-0.14197			C	7	-0.26257
			S	7	0.32442			C	7	-0.24638			S	7	0.31585			C	9	0.21247
			C	8	-0.24547			C	8	0.12175			C	8	-0.23784			C	10	0.50961
			C	9	0.50093			C	9	0.09547			C	9	0.50419			C	11	-0.26352
			O	10	-0.57708			C	11	-0.25550			O	10	-0.57975			C	13	-0.12645
			C	11	0.02588			C	13	-0.10455			C	11	0.02040			C	14	0.01893
			C	12	-0.12552			C	15	-0.19814			C	12	-0.12414			C	15	-0.17686
			C	13	-0.03933			C	16	0.50629			C	13	-0.03671			N	17	-0.35476
			C	14	-0.14504			C	17	-0.12833			C	14	-0.11829			C	18	-0.16818
			C	15	-0.27207			C	18	-0.14512			C	15	-0.26781			C	20	-0.15705
			C	16	0.21741			C	20	-0.26347			C	16	0.21535			C	22	-0.16775
			C	17	-0.26742			C	22	0.21485			C	17	-0.27255			C	23	-0.23874
			C	18	-0.11716			C	23	-0.26142			C	18	-0.14683			C	24	-0.14107
			C	19	-0.17367			C	25	-0.15546			C	19	-0.18116			C	26	-0.18397
			C	20	-0.14139			C	27	-0.35384			C	20	-0.14245			C	27	-0.14128
			C	21	-0.17689			C	31	-0.35378			C	21	-0.17849			C	29	-0.12109
			C	22	-0.14142			C	35	-0.01475			C	22	-0.14180			C	30	-0.21546
			C	23	-0.18034			C	36	-0.16925			C	23	-0.17429			C	32	-0.35357
			N	24	-0.41824			C	38	-0.14077			N	24	-0.42030			C	36	0.31523
			C	25	-0.35358			C	40	-0.18335			C	25	-0.35325			C	37	-0.14038
			C	26	-0.35350			C	41	-0.14041			C	26	-0.35334			C	39	-0.15788
			C	27	0.31274			C	43	-0.17639			C	27	0.31298			C	41	-0.35356
			N	28	-0.34542			C	45	0.31486			N	28	-0.34698			C	45	-0.22950

## Sheet: Tabelle2
	Second Order Perturbation Theory Analysis of Fock Matrix in NBO Basis
														Summary
		HTI 8					HTI 3							HTI	Isomer	Sum over all stabilizing energies in kcal/mol
		E-isomer		Z-isomer			E-isomer		Z-isomer					8	E	3317.02
															Z	3491.79
		E(2) in kcal/mol		E(2) in kcal/mol			E(2) in kcal/mol		E(2) in kcal/mol					3	E	2805.66
		1.28		1.11			0.57		0.63						Z	3285.24
		0.52		0.69			1.61		1.07
		1.77		0.82			0.53		0.69
		2.67		0.67			1.66		0.85
		1.05		3.06			2.96		3.02
		1.43		3.91			1.07		4.94
		1.06		1.12			2.79		1.16
		0.62		4.95			1.05		3.66
		2.84		1.33			2.37		1.51
		1.57		0.66			2.61		0.56
		0.51		0.61			0.77		0.6
		2.36		0.56			1.18		1.78
		2.42		0.71			1.99		0.51
		1.23		0.8			2.84		3.06
		2.12		3.69			1.18		0.53
		3.35		3.07			2.21		4.2
		4.37		3.95			3.57		2.5
		1.13		0.66			3.96		2.02
		1.64		2			1.23		1.24
		0.66		1.22			1.08		2.29
		0.54		2.47			0.74		2.33
		31.38		0.81			22.31		0.84
		17.87		2.23			19.53		4.07
		0.96		4.04			1.36		4.15
		1.28		4.75			1.4		0.64
		0.6		3.2			0.6		0.65
		0.78		0.59			0.71		1.4
		4.41		1.22			3.96		1.4
		0.61		3.31			0.67		1.17
		3.62		1.71			3.95		2.12
		0.52		1.65			0.59		1.18
		1.16		3.16			0.81		2.12
		3.18		1.16			1.3		2.3
		1.61		5.83			0.75		0.76
		1.31		1.61			0.82		1.99
		1.6		1.6			2.68		0.67
		5.78		1.31			2.1		3.47
		0.57		0.58			1.03		0.68
		1.98		2.01			4.29		2.29
		0.75		0.72			1.26		0.76
		11.44		27.91			5.76		1.99
		27.6		11.47			1.6		0.67
		1.07		0.67			0.62		3.47
		1.14		0.67			0.94		0.68
		3.75		1.41			16.84		0.63
		0.64		1.41			21.35		1
		5.37		1.16			1.67		2.05
		3.21		2.13			1.6		1.99
		0.59		2.13			0.53		0.7
		1.22		1.17			3.95		0.74
		1.73		2.31			0.69		6.14
		3.32		0.76			0.56		2.52
		1.65		2.01			4.28		2.74
		0.69		0.66			0.7		2.35
		1.36		3.49			0.84		2.67
		0.9		0.68			1.22		5.06
		0.58		2.3			0.51		2.39
		2.93		0.76			1.03		2.33
		4.77		2.01			0.55		1.42
		2.49		0.66			3.28		0.6
		2.38		3.49			2.04		0.7
		2.38		0.68			1.66		1.72
		1.76		1.43			5.01		3.01
		1.19		8.1			2.76		3.96
		0.88		2.86			1.3		1.48
		0.85		2.85			1.32		0.91
		0.58		0.91			3.72		1.3
		21.41		7.36			0.85		3.55
		15.73		0.93			0.69		2.35
		2.25		1.43			0.99		2.18
		21.98		0.9			4.55		0.94
		1.3		5.27			1.25		0.58
		0.66		4.39			1.05		0.72
		0.78		3.24			0.7		1.73
		0.76		0.98			0.63		2.95
		0.66		1.79			4.49		3.99
		3.67		1.24			2.51		1.19
		3.97		0.53			5.34		1.51
		2.88		14.74			2.42		2.34
		1.1		2.02			1.97		1.27
		0.99		0.72			2.47		3.57
		0.82		0.52			2.41		2.19
		1.17		0.73			1.74		1.72
		2.8		20.18			1.09		0.55
		2.54		1.01			0.78		0.63
		5.41		0.61			0.6		2.35
		3.65		1.84			18.99		1.86
		3.62		2.42			17.21		4.51
		1.18		1.76			1.09		18.73
		1.21		1.55			22		24.56
		0.99		1.43			1.78		1.44
		1.52		1.5			1.58		2.05
		1.28		0.78			0.61		0.99
		0.76		5.24			0.52		0.71
		1.68		2.39			2.48		4.72
		4.13		3.65			0.55		0.8
		3.04		3.16			4.22		4.26
		3.48		3.53			0.51		1.19
		1.16		2.02			2.87		0.56
		3.07		1.94			0.78		0.59
		1.69		1.38			1.35		1.11
		1.19		1.42			1.19		0.65
		1.02		0.6			2.94		3.61
		0.66		0.71			2.37		1.21
		3.4		0.7			6.04		4.05
		0.72		1.01			3.69		3.79
		0.61		2			3.33		1.53
		4.61		2.07			1.21		3.43
		0.88		6.06			1.31		49.84
		0.85		5.02			1.19		35.38
		0.9		2.37			1.61		0.78
		1.95		2.72			1.28		0.86
		4.09		2.74			0.76		1.45
		0.89		2.51			1.85		1.44
		3.27		2.33			3.63		0.52
		5.66		2.38			3.12		1.15
		1.12		0.69			3.09		3.64
		0.62		2.43			1.17		2.2
		0.64		1.22			3.02		3.75
		1.1		0.53			1.77		4.25
		1.23		1.66			1.33		2.58
		3.63		4.43			1.54		2.58
		1.12		4.64			3.74		1.59
		4.53		3.71			0.77		1.42
		1.72		1.1			0.68		0.66
		3.84		0.69			5.01		0.6
		0.94		1.36			0.83		1.2
		1.09		0.89			0.92		4
		1.19		0.75			0.89		4.66
		0.91		2.51			1.94		0.72
		3.43		2.93			3.82		1.11
		5.41		2.37			0.92		0.58
		4.31		4.78			3.23		0.62
		1.64		2.52			5.64		0.88
		1.42		0.82			1.35		1.48
		0.66		0.81			0.65		2.48
		2.03		1.77			1.11		4.22
		0.57		1.16			1.24		1.15
		0.83		0.61			3.45		3.59
		0.69		21.93			1.11		3.97
		20.76		15.79			4.58		2.39
		1.18		2.28			1.65		2.18
		0.76		21.45			3.88		1.18
		5.83		1.14			0.93		0.57
		2.44		1.07			1.09		1.43
		1.59		5.35			1.19		3.59
		3.08		0.65			0.89		1.52
		0.67		3.76			3.44		3.79
		0.51		1.27			5.41		3.56
		1.97		0.52			4.34		4.11
		0.85		1.77			1.62		1.26
		2.2		0.62			0.66		49.19
		1.19		1.42			1.43		35.75
		2.55		1.07			12.86		0.81
		4.74		1.06			1.92		1.1
		4.12		2.66			0.58		0.92
		0.74		2.82			0.79		1.42
		0.52		0.96			0.71		0.57
		0.89		1.28			20.04		0.55
		1.41		4.43			0.79		2.48
		1.46		0.62			1.16		4.22
		4.63		0.61			1.63		2.18
		5.92		0.77			3.11		3.58
		2.37		0.52			2.46		2.39
		3.12		3.61			1.98		3.97
		3.59		1.57			0.88		1.15
		1.68		0.51			2.26		0.75
		1.09		2.36			1.22		1.19
		2.02		2.13			2.41		1.19
		1.89		2.42			4.73		1.61
		1.68		1.23			4.16		1.8
		0.55		1.12			0.72		1.12
		0.84		3.33			0.59		2.77
		2.09		4.41			0.89		3.13
		2.09		1.64			1.46		3.14
		4.73		0.69			1.41		3.65
		4.27		31.61			4.72		1.84
		2.35		18.01			5.99		0.69
		2.63		0.54			2.31		2.44
		0.59		1.19			3.58		1.28
		2.56		0.98			3.09		1.59
		2.86		0.7			1.68		1.09
		2.4		4.62			1.11		4.66
		2.34		3.39			1.9		4.47
		1.45		0.61			2.04		3.53
		0.83		0.72			0.81		1.42
		1.48		0.88			1.68		1.59
		0.55		0.82			0.54		0.66
		2.79		1.1			0.84		0.73
		3.74		0.99			2.09		1.2
		4.17		1.12			2.08		4.61
		3.62		3.69			4.75		4.02
		1.12		1.18			4.31		0.6
		2.22		5.47			2.35		0.76
		2.47		2.53			2.58		1.45
		1.22		2.77			2.85		1.51
		0.8		1.18			2.57		1.56
		1.36		3.67			2.36		2.36
		0.8		0.75			2.41		1.44
		4.13		1.18			1.24		1.44
		2.06		1			0.8		2.04
		4.3		1.51			1.48		3.14
		2.51		1.72			0.81		1.97
		3.55		4.16			4.09		3.7
		2.22		2.81			2.02		3.5
		1.17		1.11			4.29		5.25
		1.52		3.05			3.55		0.52
		0.92		1.67			1.17		0.89
		0.93		3.54			2.22		1.29
		17.16		1.43			2.52		1.34
		1.46		0.86			1.44		0.62
		1		1.47			0.55		2.11
		23.71		0.52			0.82		2.5
		17.16		2.63			1.49		4.2
		1.47		3.78			2.8		2.16
		0.77		4.23			3.72		3.63
		1.7		1.14			4.22		3.95
		0.66		3.63			2.47		0.57
		1.41		2.2			3.63		1.17
		0.92		2.57			2.22		0.9
		3.13		1.33			1.13		0.92
		3.95		0.63			1.16		1.42
		3.5		0.51			0.81		0.51
		1.26		0.9			1.7		4.45
		2.19		0.56			0.65		1.24
		2.37		1.25			1.22		0.52
		1.14		0.55			1.32		1.77
		0.65		3.99			2.98		0.95
		0.82		2.14			3.93		3.26
		1.7		4.19			3.49		5.27
		1.24		2.49			1.26		14.45
		1.33		2.16			2.17		1.92
		2.98		3.62			2.31		0.67
		3.96		1.16			0.98		0.54
		2.31		2.04			1.85		0.72
		3.48		1.44			0.65		19.49
		2.16		0.7			1.81		2.43
		1.25		4.25			5.25		1.81
		1.87		1			2.15		2.17
		0.96		0.81			23.29		1.06
		0.66		4.73			18.37		0.66
		1.81		0.57			1.48		2.09
		5.39		1.13			0.66		1.38
		2.15		0.63			0.76		1.04
		18.38		1.19			1.7		4.75
		23.13		0.56			1.4		0.81
		0.5		3.59			0.91		0.7
		1.26		3.42			3.13		3.97
		0.62		4.04			3.92		0.94
		1.2		1.22			2.38		0.51
		0.54		1.54			3.51		1.12
		3.42		3.78			2.19		0.85
		4.06		35.2			1.27		1.12
		1.2		49.75			1.52		3.58
		3.8		0.8			0.58		4.01
		1.55		1.42			1.16		1.12
		3.62		1.59			0.57		1.17
		1.04		0.65			3.61		3.31
		13.53		4.63			3.99		3.32
		21.32		0.73			1.21		0.55
		2.08		1.21			3.81		21.5
		1.44		0.6			1.56		19.81
		0.66		4.01			3.56		1.43
		4.19		1.11			35.42		8.09
		0.97		0.93			51.77		2.85
		4.69		1.42			0.84		2.86
		0.79		0.57			1.49		0.91
		0.92		0.54			0.68		7.3
		1.38		2.49			1.4		1.83
		0.61		4.25			0.75		1.4
		0.54		2.19			4.4		4.79
		1.11		3.57			1.03		1.01
		3.61		1.14			4.79		0.83
		2.21		3.94			0.82		4.01
		1.16		2.38			0.95		0.71
		3.94		1.11			1.36		1.28
		2.48		0.57			0.55		0.63
		2.35		0.63			0.64		0.86
		4.28		0.88			1.12		1.12
		1.41		1.48			3.6		3.64
		1.6		2.49			2.16		4
		4.57		4.25			1.14		1.14
		1.21		2.38			3.97		3.34
		0.73		3.94			2.44		3.29
		0.62		1.14			2.42		1.21
		4.01		3.58			4.27		1.46
		0.65		2.19			1.46		1.66
		0.55		1.58			1.54		4.33
		0.64		1.42			4.61		0.78
		0.95		0.66			1.24		4.71
		1.35		4.68			0.74		1.04
		1.12		4			0.58		0.75
		3.95		0.59			4.01		0.78
		2.41		1.22			0.66		0.69
		2.45		0.73			0.61		1.25
		3.59		1.44			0.59		1.06
		1.13		1.17			0.92		2.6
		2.17		0.58			1.38		2.45
		4.29		3.57			1.11		5.36
		1.12		3.56			3.96		4.46
		0.51		4.1			2.35		1.96
		0.74		3.78			2.47		2.52
		0.85		1.53			3.62		1.15
		29.41		1.27			1.17		0.78
		14.04		35.61			2.21		1.35
		1.23		49.11			4.26		3.72
		0.69		0.82			0.69		3.38
		0.69		1.64			0.69		1.27
		1.17		1.47			1.16		6.1
		2.11		4.32			2.09		2.36
		2.09		0.74			2.11		2.92
		1.15		4.73			1.17		1.2
		1.42		0.79			1.41		0.55
		1.42		1.05			1.41		0.74
		1.52		0.57			0.51		0.82
		0.57		2.36			1.26		0.53
		1.16		4.4			0.63		0.82
		0.57		0.7			1.2		0.57
		3.6		1.7			0.54		21.62
		3.98		0.69			3.43		0.58
		3.81		1.75			4.07		23.81
		3.55		4.4			3.81		18.52
		1.57		0.59			3.64		1.39
		1.22		2.3			1.54		1.94
		1.54		0.92			1.19		4.01
		1.45		0.72			34.5		0.7
		4.62		1.73			50.07		0.89
		4.01		0.59			0.8		0.63
		0.58		1.58			1.61		4.37
		0.66		1.14			1.41		0.84
		1.25		2.93			4.55		1.49
		0.75		3.98			4.01		0.56
		1.48		1.27			0.62		1.52
		0.68		3.57			0.65		2.32
		1.4		2.19			1.2		2.86
		4.41		2.34			0.72		4.07
		0.74		1.4			2.09		1.9
		4.8		0.6			1.43		1.04
		1.04		0.71			4.2		4.89
		0.82		1.72			0.67		3.43
		0.88		1.49			4.67		2.14
		0.63		0.91			0.96		0.85
		0.98		3.01			0.79		1.42
		0.89		3.99			1.24		0.55
		1.11		2.34			0.77		1.51
		3.49		2.18			0.9		4.06
		3.92		3.54			1.11		1.91
		1.13		1.3			3.63		2.35
		3.3		0.8			3.92		2.9
		1.18		1.12			1.13		2.17
		3.3		0.55			3.33		4.89
		0.5		0.6			1.19		3.41
		21.2		2.05			3.3		1.03
		20.05		3.31			1.91		0.81
		2.04		2.18			1.44		0.55
		1.41		18.25			1		2.02
		1.03		24.17			4.81		0.85
		4.78		1.85			0.83		18.58
		0.82		1.4			4.01		19.97
		4		1.01			0.71		19.11
		0.71		4.79			0.75		1.82
		0.82		0.83			1.52		1.48
		1.52		0.71			0.56		1.48
		0.55		4			1.52		0.75
		1.52		1.27			2.88		2.35
		2.85		0.67			2.33		9.07
		2.32		0.87			1.03		2.32
		1.03		1.12			4.86		2.82
		4.85		3.65			3.4		2.8
		3.39		4.01			2.14		1.38
		2.14		1.14			4.04		1.92
		4.03		1.21			1.88		4.07
		1.89		3.34			0.83		0.7
		1.39		3.29			2.01		0.93
		1.94		0.58			0.87		4.34
		4.07		21.47			19.04		0.61
		0.92		19.84			19.6		1.04
		0.69		1.38			18.71		0.84
		0.63		1.92			1.38		1.22
		4.37		4.06			1.94		0.56
		0.56		0.7			4.11		2.75
		0.75		0.93			0.93		4.98
		1.52		0.61			0.69		2.03
		1.52		4.34			0.63		3.28
		4.85		0.84			4.37		1.68
		2.14		1.43			0.55		0.84
		3.39		0.55			0.82		0.74
		2.88		1.51			1.52		1.79
		1.03		4.05			1.52		1.51
		2.32		1.9			4.86		18.75
		4.03		2.35			2.14		21.3
		1.88		2.9			3.39		1.4
		2.01		1.03			2.85		1.36
		0.81		4.88			1.03		3.94
		0.88		3.4			2.32		0.7
		19.14		2.16			4.04		0.61
		19.6		0.56			1.89		0.6
		18.63		0.83			1.46		0.68
		1.47		1.5			1.47		3.97
		1.46		1.52			0.72		2.03
		0.72		4.06			1.81		0.76
		1.8		1.89			2.36		1.18
		2.35		2.14			2.8		4
		2.79		4.88			2.79		3.55
		2.8		3.43			2.35		1.17
		2.36		1.04			9.09		2.83
		9.1		2.86			0.89		1.23
		1.24		2.31			0.62		2.21
		0.77		1.96			0.99		0.53
		0.9		0.68			0.89		1.66
		1.11		0.86			1.11		0.57
		3.65		19.05			3.48		1.61
		3.92		18.41			3.92		1.08
		3.32		19.54			3.3		2.95
		3.3		1.82			3.31		2.6
		1.19		1.48			1.18		1.06
		1.13		1.48			1.13		2.79
		1.93		0.77			0.51		2.36
		1.37		9.07			21.2		1.18
		4.12		2.33			20.03		0.54
		4.37		2.8			1.94		0.7
		0.63		2.82			1.39		23.61
		0.93		2.35			4.06		20.06
		0.69		1.94			4.37		0.55
		1.9		1.39			0.62		2.49
		1.44		4			0.91		4.41
		4.82		4.37			0.69		0.72
		1		0.63			2.04		1.57
		4.01		0.89			1.4		1.52
		0.84		0.7			4.77		1.32
		0.71		0.95			1.03		5.02
		2.32		1.14			4.01		0.83
		0.76		0.85			0.82		0.68
		3.45		1.12			0.71		0.77
		2.01		3.6			2.32		3.73
		0.66		4.01			0.76		1.68
		0.68		3.3			3.44		1.59
		2.32		3.32			2.01		4.27
		0.76		1.17			0.66		0.69
		3.46		1.12			0.68		3.95
		2.01		2.09			2.32		0.53
		0.66		1.38			0.76		0.55
		0.68		4.77			3.44		0.7
		0.62		1.05			2.01		0.74
		2.13		3.97			0.67		0.82
		0.66		0.7			0.68		0.81
		1.92		0.81			0.66		1.31
		4.4		1.19			1.95		5.8
		0.65		1.38			0.63		4.3
		1.99		0.67			2.1		2.09
		0.64		1			4.39		2.67
		2.05		0.62			0.62		1.03
		4.39		6.11			2.16		1.25
		1.42		1.06			0.67		0.72
		8.13		0.91			1.89		1.6
		2.86		3.04			4.4		4.4
		2.86		1.35			1.43		0.56
		0.95		0.85			8.13		2.46
		7.48		0.76			2.86		1.32
		1.63		1.1			2.86		1.29
		0.81		0.77			0.95		4.55
		0.73		1.19			7.46		1
		0.63		1.87			1.5		3.71
		0.65		1.2			0.92		0.69
		0.85		1.19			0.68		0.84
		1.4		0.7			0.66		1.22
		0.76		0.69			0.9		1.3
		0.82		7.26			0.93		1.01
		1.81		5.23			1.43		0.59
		1.36		2.08			0.86		1.11
		0.84		0.76			0.84		6.13
		3.02		0.64			0.6		0.93
		0.77		0.81			0.85		1.03
		1.1		1.27			1.01		1.19
		0.76		0.95			1.29		1.81
		0.85		1.27			1.95		1.19
		1.83		0.74			0.58		1.19
		1.5		0.84			0.91		0.69
		0.83		0.73			1.18		0.69
		0.61		0.71			1.39		0.83
		0.95		2.22			1.81		1.48
		0.74		0.9			1.07		1.49
		1.57		0.98			1.29		0.6
		0.62		0.59			0.74		0.87
		1.58		1.22			0.81		0.84
		0.85		1.55			0.99		0.84
		0.73		1.19			1.04		1.13
		0.98		0.85			0.75		0.56
		0.83		1.87			1.71		1.09
		0.71		0.64			1.47		1.13
		0.51		1.51			0.82		1.11
		0.55		0.82			0.78		0.91
		1.32		0.95			1.13		0.6
		0.63		0.73			0.89		1.43
		1.68		0.75			0.73		0.6
		0.74		1.4			0.52		1.13
		1.04		1.81			0.56		0.82
		1.24		0.82			1.33		0.91
		1.4		1.64			1.09		1.19
		1.14		0.63			1.19		0.53
		0.7		0.8			0.87		0.97
		0.63		0.75			1.2		1.03
		0.88		0.66			1.14		1.22
		0.9		0.85			1.34		1.22
		1.91		1.31			1.17		0.76
		0.93		0.6			1.14		0.76
		1.18		1.69			0.59		0.98
		0.63		1.04			0.9		0.88
		1.5		0.74			0.92		1.04
		1.23		1.25			1.93		0.62
		0.51		1.56			0.89		0.91
		0.77		0.64			1.18		1.12
		0.65		1.58			0.61		0.71
		0.58		0.84			1.5		1.41
		0.52		0.72			1.24		0.61
		0.59		0.59			1		0.59
		0.96		0.99			0.81		0.82
		1.13		0.5			0.52		1.18
		6.1		0.84			0.63		0.91
		0.89		0.73			0.9		1.26
		1.08		0.81			1.14		0.53
		2.11		0.82			6.12		0.74
		0.72		1.04			0.9		1.29
		0.66		0.58			1.06		0.66
		0.8		0.98			2.13		0.86
		1.04		0.53			0.72		0.86
		1.43		0.75			0.65		1.05
		0.91		1.26			0.8		0.81
		0.73		1.29			1.07		0.76
		0.84		1.07			1.44		0.62
		0.72		0.67			0.93		2.11
		0.76		0.86			0.84		1.3
		0.96		0.85			0.73		0.71
		1.24		1.11			0.76		0.74
		1.27		1.15			0.72		0.74
		1.17		0.56			0.94		1.29
		0.67		1.11			1.29		0.83
		0.86		0.9			1.24		0.97
		0.85		1.13			1.17		0.82
		0.97		1.12			0.66		1.59
		1.47		0.71			0.85		0.54
		1.46		0.6			0.86		0.93
		0.8		1.41			0.98		0.63
		0.61		0.62			1.46		1.07
		0.84		0.82			1.47		1.03
		0.84		1.18			0.79		0.94
		1.19		0.91			0.61		7.26
		0.54		0.53			0.84		5.23
		1.14		1.06			0.84		0.69
		0.56		0.92			1.34		0.7
		1.1		1.23			0.63		0.72
		0.89		1.23			1.12		0.96
		1.11		0.75			0.55		1.08
		1.03		0.76			1.17		1.02
		0.67		1.43			0.9		0.95
		1.39		0.6			1.15		0.94
		0.64		0.6			1		0.57
		0.6		1.12			0.59		1.2
		1.18		0.51			1.44		0.62
		0.91		0.81			0.57		0.89
		0.82		1.19			0.59		1.13
		1.05		0.91			1.17		1.16
		1.01		1.22			0.92		0.81
		0.52		0.6			0.81		1.71
		0.75		0.9			1.14		1.48
		0.75		0.58			1.05		0.74
		1.24		1.16			0.52		0.6
		1.24		0.88			0.75		0.52
		1.44		1.13			0.75		0.9
		0.57		1.07			1.23		1.13
		1		0.87			1.23		0.78
		0.67		1.07			1.39		0.91
		0.58		0.87			0.65		2.21
		1.17		0.83			1.03		0.94
		0.91		1.5			0.69		0.57
		0.81		1.49			0.6		1.2
		1.34		0.87			1.17		1.55
		0.62		0.61			0.92		1.22
		1		0.84			0.82		0.77
		0.53		0.84			1.19		0.88
		1.18		0.65			0.55		0.59
		0.91		0.76			1.15		1.17
		1.15		0.69			0.56		1.03
		0.8		0.96			1.1		0.99
		1.23		1.08			0.89		0.94
		0.93		1.02			1.11		1.51
		0.66		0.95			0.76		1.49
		0.51		0.68			0.98		1.07
		1.06		0.87			0.96		0.76
		1.04		0.6			0.79		3.33
		0.94		1.15			0.56		0.76
		0.86		1.05			1.08		0.68
		0.94		0.99			1.02		0.98
		1.17		0.93			0.95		1.15
		0.6		1.49			0.75		0.59
		1.04		1.51			0.91		1.05
		0.99		1.07			1.16		0.99
		0.93		3.32			0.6		0.93
		1.52		0.76			1.05		1.12
		1.51		0.76			0.99		1.23
		1.07		1.17			0.93		1.82
		0.76		0.59			1.51		1.02
		0.76		0.76			1.52		0.74
		3.31		0.96			1.07		0.8
		1.16		1.03			0.76		1.04
		0.74		0.99			0.76		0.74
		0.9		0.94			3.31		0.66
		0.6		0.82			1.17		0.9
		1.05		1.62			0.87		0.66
		0.99		0.93			0.93		1.5
		0.93		0.54			0.6		0.92
		0.77		1.07			1.04		0.9
		0.99		1.03			0.99		1.07
		0.96		0.94			0.93		0.87
		0.8		0.77			0.8		0.77
		0.56		0.98			1.25		0.98
		1.09		0.98			0.93		0.98
		1.02		0.7			0.62		0.7
		0.95		0.79			0.51		0.79
		1.18		0.78			1.06		0.78
		1.85		0.78			1.03		0.78
		1.2		1.59			0.95		1.07
		1.2		2.05			1.18		1.2
		0.69		2.26			1.9		1.32
		0.69		2.78			1.2		1.14
		1.07		0.52			1.2		1.2
		0.87		1.14			0.69		0.87
		1.07		0.6			0.69		1.44
		0.87		17.53			1.07		0.6
		0.98		20.55			0.88		0.86
		0.71		0.52			1.07		0.84
		0.77		13.84			0.87		1.01
		0.98		2.56			0.98		0.85
		0.78		2.58			0.71		1.07
		0.78		1.45			0.77		0.87
		0.8		2.14			0.98		1.98
		7.24		0.55			0.78		1.29
		5.26		21.25			0.78		0.58
		2.86		18.44			0.8		1.4
		5.02		1.13			7.25		1.19
		8.94		5.06			5.25		0.9
		4.39		2.84			1.88		1.63
		10.93		2.85			1.62		1.84
		2.84		10.94			2.8		2.24
		2.06		4.38			2.19		2.83
		1.58		8.91			0.96		0.54
		2.76		117.1			19.14		0.96
		2.22		3.28			17.11		17.59
		1.18		2.15			0.56		20.15
		0.61		2.16			13.9		13.91
		20.95		4.99			2.54		2.63
		17.06		6.05			2.6		2.49
		0.56		5.94			1.37		1.45
		13.83		5.12			2.09		2.15
		2.49		16.4			18.06		0.58
		2.67		11.58			0.6		18.01
		1.36		0.54			21.32		21.45
		2.03		1.22			1.03		114.96
		18.48		2.73			1.05		3.25
		0.57		2.65			2.82		2.06
		21.11		1.41			2.56		2.09
		3.45		47.93			1.48		4.84
		2.2		1.89			47.55		6.26
		2.21		70.54			2.54		6.19
		50.68		71.85			0.86		4.91
		5.34		1.38			70.01		1.38
		5.75		0.75			74.23		0.74
		5.6		1.82			2.15		1.25
		5.52		0.73			0.63		0.74
		16.34		1.18			1.14		1.15
		0.72		1.11			1.76		1.69
		11.61		0.74			0.76		0.73
		2.28		51.38			1.37		51.84
		1.9		51.99			0.78		52.57
		2.3		1.64			47.75		2.75
		0.63		1			52.35		1.16
		0.71		1.3			115.13		2.66
		118.41		120.77			3.29		1.98
		235.36		0.64			2.21		0.68
		0.92		0.71			2.21		71.12
		1.14		2.31			5.72		72.73
		0.59		227.53			5.48		1.49
		2.9		116.76			5.33		45.46
		0.52		0.95			5.83		16.4
		0.6		0.94			16.35		0.61
		295.73		0.95			0.72		11.57
		0.58		0.77			11.6		1.62
		0.7		0.56			1.94		1
		1.06		0.92			1.1		1.05
		120.1		1.08			1.99		135.64
		0.76		0.6			1.31		178.61
		0.86		0.51			0.68		0.66
		0.95		2.69			1.14		2.58
		1.12		0.57			1.8		1.04
		1.71		294.85			3.46		0.87
		152		2.27			0.85		1.15
		0.56		1.96			0.71		2.14
		0.56		1.15			265.64		1.63
		0.56		2.31			0.86		0.92
		2.94		1.4			1.04		0.56
		0.67		0.86			0.85		0.92
		0.68		0.6			0.75		1
		2.9		2.8			0.95		0.75
		0.82		0.79			0.97		0.91
		0.91		1.19			1.69		1.13
		1.59		1.45			0.78		1.49
		0.63		1.79			2.88		0.76
		1.17		0.64			0.68		0.8
		2.39		1.04			0.82		2.59
		0.57		3.1			40		0.68
		0.59		23.65			0.91		1.11
		1.1		266.53			0.64		3.09
		2.52		226.38			0.73		269.79
		281.89					0.55		269.61
		268.49					2.45		24.1
		1.17					2.45		0.63
		0.54					1.18		0.61
		1.19					3.18		1.57
		0.57					0.9		0.65
		1.72					0.69		4.3
		0.68					262.49		1.98
		0.87					22.99		190.34
		3.18					1.13		2.92
		22.78					0.57		1.41
							1.19
							0.53
							1.57
