# Supplementary material for: A cross-conjugation approach for high-performance diaryl-hemithioindigo photoswitches
Source: Royal Society of Chemistry journal article supplement (doi:10.1039/d2sc06939c), 2023-01-01
Supplement: d2sc06939c2.pdf [file d2sc06939c2.pdf]

# Electronic Supplementary Information

## A Cross-Conjugation Approach for High-Performance Diaryl-Hemithioindigo Photoswitches

*Max Zitzmann,<sup>§</sup> Frank Hampel,<sup>§</sup> Henry Dube<sup>§\*</sup>*

<sup>§</sup> Friedrich-Alexander-Universität Erlangen-Nürnberg, Department of Chemistry and Pharmacy, Nikolaus-Fiebiger-Str. 10, 91058 Erlangen, Germany.

### Table of Contents

|                                                                                                        |     |
|--------------------------------------------------------------------------------------------------------|-----|
| Synthesis .....                                                                                        | 2   |
| General Procedures, Instrumentation and Materials .....                                                | 2   |
| Synthesis Overview .....                                                                               | 4   |
| Synthetic Protocols .....                                                                              | 6   |
| Synthesis of Thioethers 12-14 .....                                                                    | 6   |
| General procedure for the synthesis of (3-hydroxybenzo[ <i>b</i> ]thiophen-2-yl)methanones 15-17 ..... | 9   |
| Synthesis of vinyl chlorides 18-20.....                                                                | 11  |
| Synthesis of Diaryl-HTIs 1-10.....                                                                     | 15  |
| UV/Vis Spectroscopic Measurements .....                                                                | 25  |
| Determination of the UV/Vis Spectra of Pure <i>Z</i> and <i>E</i> Isomers .....                        | 25  |
| Molar Extinction Coefficients of Diaryl-HTIs .....                                                     | 27  |
| NMR Irradiation experiments .....                                                                      | 34  |
| Thermal Double Bond Isomerization.....                                                                 | 44  |
| Quantum Yield Determination.....                                                                       | 57  |
| Molecular Logic Application of Diaryl-HTIs 3 and 8 in Logic Gates and Keypad Locks.....                | 66  |
| Theoretical Description of Diaryl-HTI 3 and Diaryl-HTI 8 .....                                         | 75  |
| 1D NOE NMR Spectra for Determination of Isomer Configuration.....                                      | 78  |
| Crystal Structural Data.....                                                                           | 84  |
| NMR spectra .....                                                                                      | 87  |
| References.....                                                                                        | 106 |

## Synthesis

### General Procedures, Instrumentation and Materials

**General.** All reactions involving oxygen- or moisture-sensitive compounds were carried out in dry reaction vessels under an inert atmosphere of nitrogen using anhydrous solvents and standard Schlenk techniques. All oxygen- and moisture-sensitive liquids and anhydrous solvents were transferred *via* a syringe or a stainless-steel cannula. Analytical TLC analysis was performed on aluminum plates coated with 0.20 mm silica gel containing a fluorescent indicator (Macherey-Nagel, ALUGRAM®, Sil G/UV<sub>254</sub>) or on aluminum plates coated with 0.20 mm aluminum oxide containing a fluorescent indicator (Macherey-Nagel, ALUGRAM®, ALOX N/UV<sub>254</sub>). For visualization TLC plates were exposed to ultraviolet light ( $\lambda = 254$  nm and 366 nm). Column chromatography was performed on silica gel (Macherey-Nagel, M-N Silica Gel 60A, 230-400 mesh) or aluminum oxide (Macherey-Nagel, M-N Aluminum oxide neutral, 90A, 50-200 mesh).

**Solvents and Reagents.** Reagents were purchased at reagent grade from commercial suppliers and used without further purification. MgSO<sub>4</sub> was used as the drying agent after aqueous workup.

**Instrumentation.** <sup>1</sup>H- and <sup>13</sup>C-NMR spectra were recorded on a Bruker Avance Neo HD 400 (Bruker, 400 MHz for <sup>1</sup>H, 101 MHz for <sup>13</sup>C), a Bruker Avance Neo HD 500 (Bruker, 500 MHz for <sup>1</sup>H, 126 MHz for <sup>13</sup>C), and a Bruker Avance Neo HD 600 (Bruker, 601 MHz for <sup>1</sup>H, 151 MHz for <sup>13</sup>C) spectrometer. Chemical shifts ( $\delta$ ) are reported in ppm and were referenced to the residual solvent signal as an internal reference (CDCl<sub>3</sub>: 7.26 ppm for <sup>1</sup>H and 77.16 ppm for <sup>13</sup>C, (CD<sub>3</sub>)<sub>2</sub>CO: 2.05 ppm for <sup>1</sup>H and 29.84 ppm for <sup>13</sup>C, CD<sub>2</sub>Cl<sub>2</sub>: 5.32 ppm for <sup>1</sup>H and 54.00 ppm for <sup>13</sup>C, (CD<sub>3</sub>)<sub>2</sub>SO: 2.50 ppm for <sup>1</sup>H and 39.52 ppm for <sup>13</sup>C, toluene-*d*<sub>8</sub>: 2.09 ppm for <sup>1</sup>H, benzene-*d*<sub>6</sub>: 7.16 ppm for <sup>1</sup>H, THF-*d*<sub>8</sub>: 3.58 ppm for <sup>1</sup>H). Coupling constants (*J*) are given in Hz as observed and the apparent resonance multiplicity is reported as s (singlet), d (doublet), t (triplet), q (quartet), dd (doublet of doublets), dt (doublet of triplets), td (triplet of doublets) and ddd (doublet of doublets of doublets) or m (multiplet).<sup>[1]</sup>

All signals of solvents and impurities are assigned according to literature. CDCl<sub>3</sub> (Deutero GmbH, 99.8%), toluene-*d*<sub>8</sub> (Deutero GmbH, 99.5%), (CD<sub>3</sub>)<sub>2</sub>CO (Deutero GmbH, 99.8%), (CD<sub>3</sub>)<sub>2</sub>SO (Deutero GmbH, 99.0%), CD<sub>2</sub>Cl<sub>2</sub> (Deutero GmbH, 99.6%) and benzene-*d*<sub>6</sub> (Deutero GmbH, 99.5%) were used to dissolve the samples. All spectra were recorded at ambient probe temperatures if not otherwise stated.

**Medium pressure liquid chromatography** was performed on a Biotage Isolera One or on a Biotage Selekt instrument. As stationary phase a CHROMABOND® Flash RS 40 SiOH column (particle size 40-63  $\mu\text{m}$ ), a CHROMABOND® Flash RS 25 SiOH column (particle size 40-63  $\mu\text{m}$ ), a CHROMABOND® Flash RS 15 SiOH column (particle size 40-63  $\mu\text{m}$ ), and a CHROMABOND® Flash RS 4 SiOH column (particle size 40-63  $\mu\text{m}$ ) were used.

**Mass spectra** were obtained from a MicroTOF II (Bruker, HR ESI and APPI) or a UltraflexTOF/TOF (Bruker, HR MALDI) mass spectrometer.

**IR spectra** were recorded on a 660-IR (Varian, ATR mode) spectrometer and characteristic IR absorptions were reported in  $\text{cm}^{-1}$  and labeled as strong (s), medium (m) and weak (w).

**UV/Vis absorption** measurements were acquired on a Cary 60 UV-Vis (Agilent Technologies) or on a Cary 500 UV-Vis NIR (Varian) spectrophotometer in a quartz cuvette (1 cm) at room temperature. The absorption maxima ( $\lambda_{\text{max}}$ ) are reported in nm with the extinction coefficient ( $\epsilon$ ) in  $\text{M}^{-1}\text{cm}^{-1}$ .

**Melting Points** (m.p.) were measured on a Büchi B-540 melting point apparatus in open capillaries.

**Irradiation experiments.** LEDs for irradiation were purchased from Thorlabs GmbH and Roithner Lasertechnik GmbH (405 nm, 430 nm, 450 nm, 470 nm, 490 nm, 505 nm, 515 nm, 530 nm, 554 nm, 565 nm, 590 nm, 617 nm, 625 nm, 650 nm).

**X-ray diffraction of a single crystal** was performed on a *SuperNova Atlas* diffractometer using Cu-K $\alpha$ -radiation.

## Synthesis Overview

Synthesis of diaryl-HTIs **1-4** and **6-9** followed a published protocol.<sup>[2]</sup> Diaryl-HTIs **5** and **10** were obtained from condensation of benzothiophenones **22** and **23** with ketone **26**. Precursors **11**, **22**, and **23** were synthesized according to established synthetic protocols.<sup>[3-5]</sup>

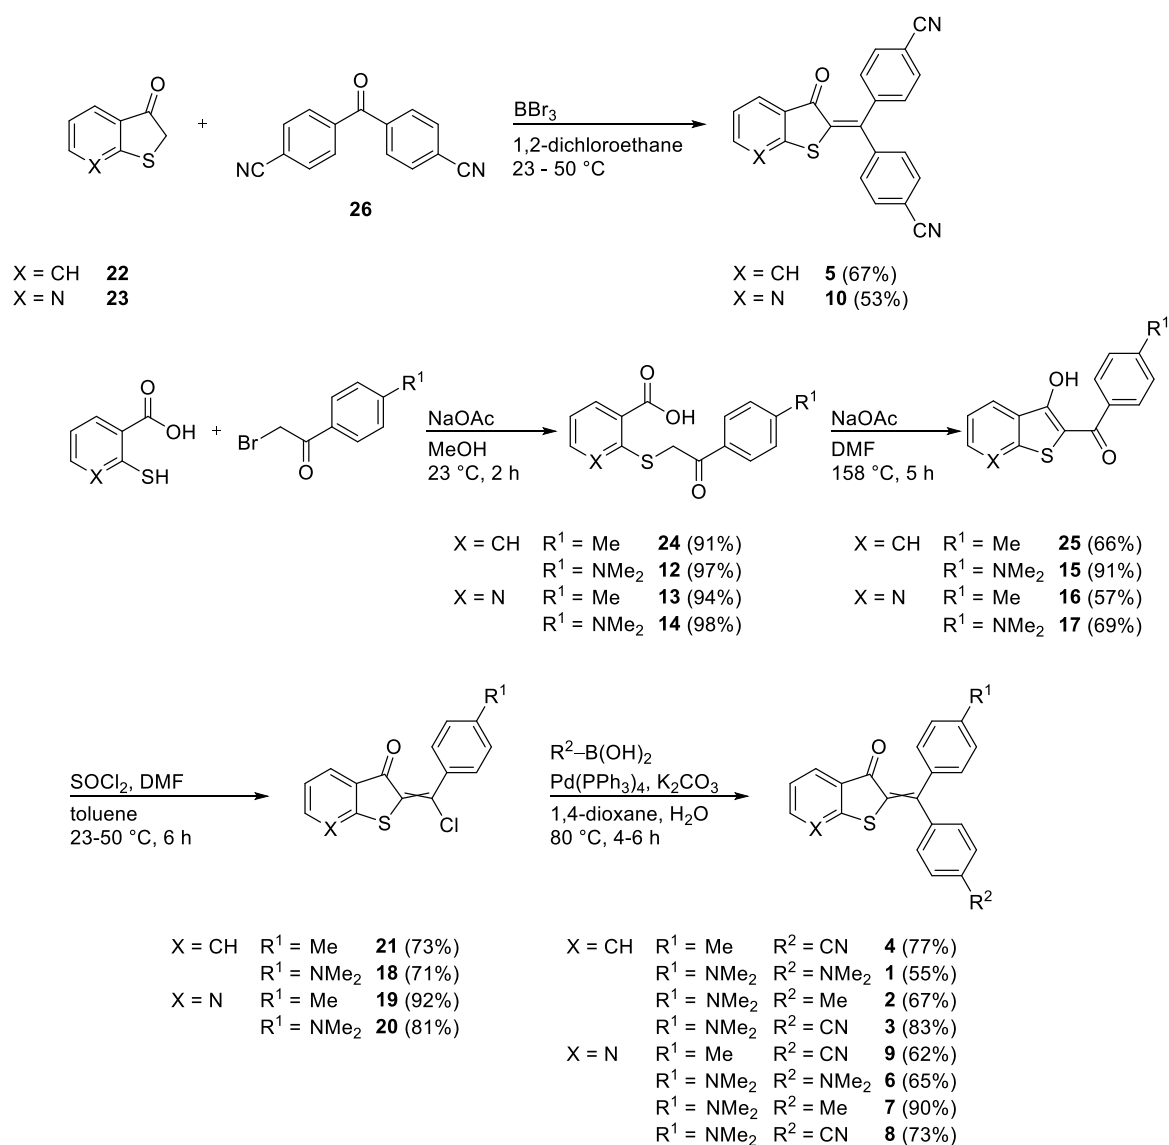

**Scheme S1:** Synthetic pathway towards substituted diaryl-HTIs **1-10**.

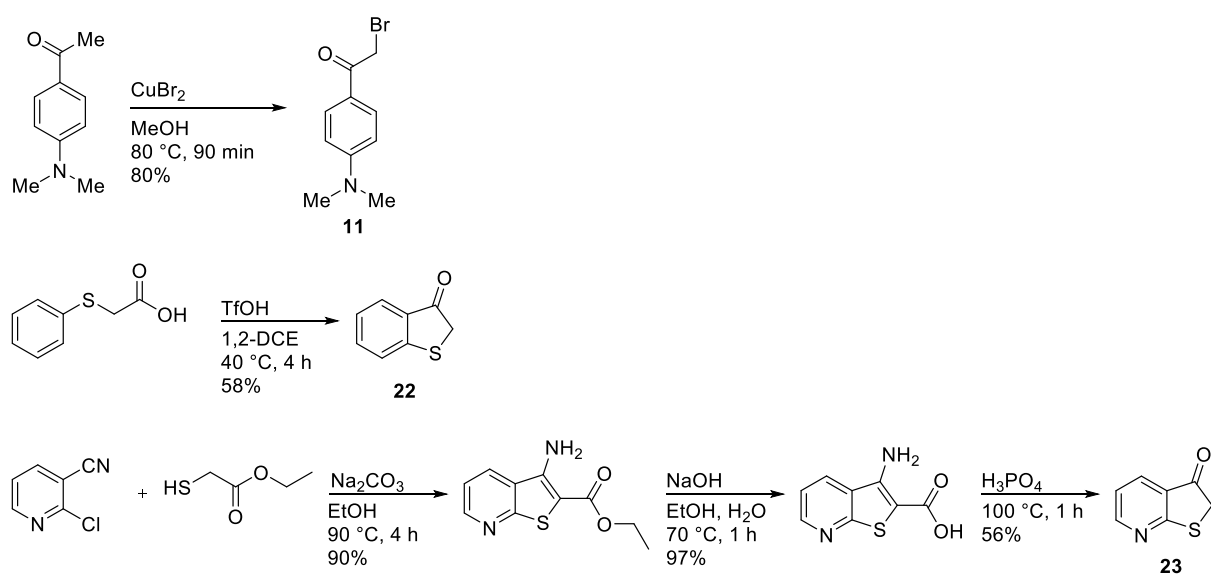

**Scheme 2:** Synthesis of precursors **11**, **22**, and **23**.

## Synthetic Protocols

### Synthesis of Thioethers 12-14

Alpha-brominated ketone **11** was synthesized according to a previously published protocol.<sup>[3]</sup>

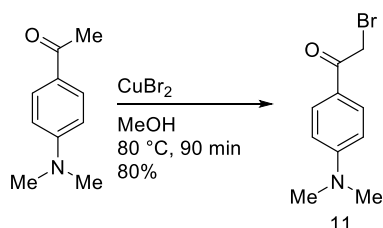

**Scheme S3:** Synthesis of alpha-brominated ketone **11**.

### General procedure for the synthesis of thioethers 12-14

Thioethers **12-14** were synthesized according to a published procedure:<sup>[2]</sup> Thiosalicylic acid or 2-mercaptonicotinic acid were suspended in methanol before sodium acetate and the alpha-bromination products of the corresponding ketones were added. The suspension was stirred at  $20^\circ\text{C}$  for 45 min and poured into ice water. The precipitate was filtered off and dried *in vacuo*.

### 2-((2-(4-(Dimethylamino)phenyl)-2-oxoethyl)thio)benzoic acid (**12**)

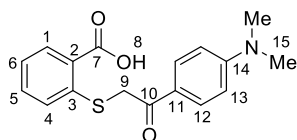

2-((2-(4-(Dimethylamino)phenyl)-2-oxoethyl)thio)benzoic acid (**12**) was prepared from 2-bromo-1-(4-(dimethylamino)phenyl)ethan-1-one (2.90 g, 12.0 mmol), thiosalicylic acid (1.85 g, 12.0 mmol), and sodium acetate (1.97 g, 24.0 mmol) in methanol (50 mL) according to the general procedure. The title compound was obtained as colorless solid (3.66 g, 97%).

m.p.:  $170-171^\circ\text{C}$

$^1\text{H-NMR}$  (400 MHz,  $(\text{CD}_3)_2\text{SO}$ ):  $\delta$  = 13.05 (s, 1H, H-C(8)), 7.92 – 7.87 (m, 3H, H-C(1 and 12)), 7.51 – 7.45 (m, 2H, H-C(4 and 5)), 7.20 (ddd,  $J$  = 7.8, 5.8, 2.6 Hz, 1H, H-C(6)), 6.75 – 6.70 (m, 2H, H-C(13)), 4.46 (s, 2H, H-C(9)), 3.03 (s, 6H, H-C(15))

$^{13}\text{C}$ -NMR (101 MHz,  $(\text{CD}_3)_2\text{SO}$ ):  $\delta$  = 191.9 (C(10)), 167.5 (C(7)), 153.5 (C(14)), 140.8 (C(3)), 132.3 (C(5)), 130.9 (C(1)), 130.7 (C(12)), 127.8 (C(2)), 126.0 (C(4)), 124.0 (C(6)), 122.8 (C(11)), 110.7 (C(13)), 38.2 (C(9)), (C(15)) is superimposed by the solvent signal at 39.5 ppm  
 IR:  $\tilde{\nu}$  = 3435 (m), 2893 (w), 1676 (w), 1648 (w), 1583 (s), 1538 (m), 1382 (m), 1323 (w), 1249 (m), 1166 (m), 1042 (w), 998 (w), 977 (w), 819 (w), 771 (S), 741 (m)  
 HRMS (APPI,  $\text{CH}_2\text{Cl}_2$ , positive mode) calcd. for  $\text{C}_{17}\text{H}_{18}\text{NO}_3\text{S}$   $[\text{M}+\text{H}]^+$  316.1002, found 316.1005

### 2-((2-Oxo-2-(*p*-tolyl)ethyl)thio)nicotinic acid (**13**)

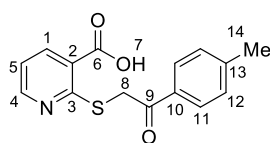

2-((2-Oxo-2-(*p*-tolyl)ethyl)thio)nicotinic acid (**13**) was prepared by reacting 2-bromo-1-(*p*-tolyl)ethan-1-one (6.87 g, 32.2 mmol), 2-mercaptonicotinic acid (5.00 g, 32.2 mmol), and sodium acetate (5.29 g, 64.4 mmol) in methanol (100 mL) according to the general procedure. The title compound was obtained as colorless solid (8.67 g, 94%).

m.p.: 216-217 °C

$^1\text{H}$ -NMR (400 MHz,  $(\text{CD}_3)_2\text{SO}$ ):  $\delta$  = 13.49 (s, 1H, H-C(7)), 8.39 (dd,  $J$  = 4.7, 1.8 Hz, 1H, H-C(4)), 8.22 (dd,  $J$  = 7.7, 1.8 Hz, 1H, H-C(1)), 7.96 – 7.93 (m, 2H, H-C(11)), 7.37 – 7.34 (m, 2H, H-C(12)), 7.19 (dd,  $J$  = 7.8, 4.8 Hz, 1H, H-C(5)), 4.64 (s, 2H, H-C(8)), 2.40 (s, 3H, H-C(14))

$^{13}\text{C}$ -NMR (101 MHz,  $(\text{CD}_3)_2\text{SO}$ ):  $\delta$  = 194.1 (C(9)), 166.4 (C(6)), 159.7 (C(3)), 151.6 (C(4)), 143.5 (C(13)), 139.1 (C(1)), 134.1 (C(10)), 129.3 (C(12)), 128.3 (C(11)), 123.3 (C(2)), 119.1 (C(5)), 37.0 (C(8)), 21.2 (C(14))

IR:  $\tilde{\nu}$  = 3174 (m), 2909 (w), 1705 (w), 1665 (m), 1601 (w), 1572 (w), 1554 (w), 1400 (m), 1352 (m), 1200 (m), 1133 (m), 1070 (m), 800 (m), 763 (m), 695 (m)

HRMS (APPI,  $\text{CH}_2\text{Cl}_2$ , positive mode) calcd. for  $\text{C}_{15}\text{H}_{14}\text{NO}_3\text{S}$   $[\text{M}+\text{H}]^+$  288.0689, found 288.0693

**2-((2-(4-(Dimethylamino)phenyl)-2-oxoethyl)thio)nicotinic acid (14)**

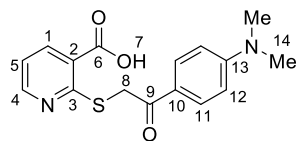

2-((2-(4-(Dimethylamino)phenyl)-2-oxoethyl)thio)nicotinic acid (**14**) was prepared from 2-bromo-1-(4-(dimethylamino)phenyl)ethan-1-one (3.46 g, 14.3 mmol), 2-mercaptonicotinic acid (2.22 g, 14.3 mmol), and sodium acetate (2.34 g, 28.6 mmol) in methanol (50 mL) according to the general procedure. The title compound was obtained as colorless solid (4.44 g, 98%).

m.p.: 215-216 °C

$^1\text{H-NMR}$  (400 MHz,  $(\text{CD}_3)_2\text{SO}$ ):  $\delta$  = 13.46 (s, 1H, H-C(7)), 8.47 (dd,  $J$  = 4.8, 1.8 Hz, 1H, H-C(4)), 8.21 (dd,  $J$  = 7.7, 1.9 Hz, 1H, H-C(1)), 7.90 – 7.86 (m, 2H, H-C(11)), 7.20 (dd,  $J$  = 7.8, 4.8 Hz, 1H, H-C(5)), 6.76 – 6.72 (m, 2H, H-C(12)), 4.58 (s, 2H, H-C(8)), 3.03 (s, 6H, H-C(14))

$^{13}\text{C-NMR}$  (101 MHz,  $(\text{CD}_3)_2\text{SO}$ ):  $\delta$  = 191.8 (C(9)), 166.4 (C(6)), 160.1 (C(3)), 153.4 (C(13)), 151.7 (C(4)), 139.0 (C(1)), 130.3 (C(11)), 123.7 (C(10)), 123.3 (C(2)), 119.0 (C(5)), 110.7 (C(12)), 36.4 (C(8)), (C(14)) is superimposed by the solvent signal at 39.5 ppm

IR:  $\tilde{\nu}$  = 3464 (m), 2910 (w), 1700 (m), 1556 (s), 1538 (s), 1438 (m), 1326 (m), 1248 (w), 1168 (s), 1071 (m), 1004 (m), 820 (m), 765 (s)

HRMS (APPI, methanol, positive mode) calcd. for  $\text{C}_{16}\text{H}_{17}\text{N}_2\text{O}_3\text{S}$   $[\text{M}+\text{H}]^+$  317.0954, found 317.0958

## General procedure for the synthesis of (3-hydroxybenzo[*b*]thiophen-2-yl)methanones 15-17

Compounds **15-17** were synthesized according to a published protocol:<sup>[2]</sup> Thioethers **12-14** were dissolved in DMF and sodium acetate was added. The mixture was heated to 158 °C for 4 h. After cooling to 23 °C the solvent was removed under reduced pressure and the crude product was purified by column chromatography or MPLC.

### (4-(Dimethylamino)phenyl)(3-hydroxybenzo[*b*]thiophen-2-yl)methanone (**15**)

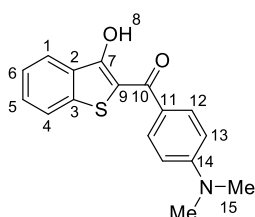

(4-(Dimethylamino)phenyl)(3-hydroxybenzo[*b*]thiophen-2-yl)methanone (**15**) was prepared from 2-((2-(4-(dimethylamino)phenyl)-2-oxoethyl)thio)benzoic acid (**12**) (2.00 g, 6.34 mmol), and sodium acetate (1.56 g, 19.0 mmol) in DMF (5 mL) according to the general procedure. The crude product was purified by MPLC (SiO<sub>2</sub>, hexanes to hexanes/ethyl acetate 4:1) to afford **15** as orange solid (1.71 g, 91%).

m.p.: 151-152 °C

*R*<sub>f</sub> = 0.81 (SiO<sub>2</sub>, ethyl acetate)

<sup>1</sup>H-NMR (400 MHz, CDCl<sub>3</sub>): δ = 14.17 (s, 1H, H-C(8)), 8.11 (d, *J* = 8.6 Hz, 2H, H-C(12)), 8.04 (d, *J* = 7.9 Hz, 1H, H-C(1)), 7.74 (d, *J* = 8.1 Hz, 1H, H-C(4)), 7.52 (t, *J* = 7.4 Hz, 1H, H-C(5)), 7.41 (t, *J* = 7.5 Hz, 1H, H-C(6)), 6.76 (d, *J* = 8.6 Hz, 2H, H-C(13)), 3.10 (s, 6H, H-C(15))

<sup>13</sup>C-NMR (101 MHz, CDCl<sub>3</sub>): δ = 189.3 (C(10)), 165.2 (C(7)), 153.4 (C(14)), 140.3 (C(3)), 131.2 (C(12)), 130.7 (C(2)), 129.6 (C(5)), 125.2 (C(11)), 124.6 (C(6)), 123.8 (C(1)), 122.9 (C(4)), 111.2 (C(13)), 109.1 (C(9)), 40.3 (C(15))

IR:  $\tilde{\nu}$  = 2905 (w), 1595 (w), 1560 (m), 1508 (s), 1376 (m), 1234 (m), 1196 (w), 1168 (w), 1092 (w), 886 (m), 821 (m), 750 (s), 722 (s), 701 (m)

HRMS (APPI, CH<sub>2</sub>Cl<sub>2</sub>, positive mode) calcd. for C<sub>17</sub>H<sub>15</sub>NO<sub>2</sub>S [M]<sup>+</sup> 297.0818, found 297.0815

**(3-Hydroxythieno[2,3-b]pyridin-2-yl)(*p*-tolyl)methanone (16)**

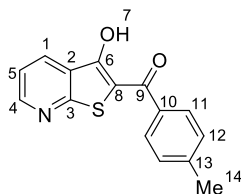

(3-Hydroxythieno[2,3-b]pyridin-2-yl)(*p*-tolyl)methanone (**16**) was prepared from 2-((2-oxo-2-(*p*-tolyl)ethyl)thio)nicotinic acid (**13**) (2.00 g, 6.96 mmol), and sodium acetate (1.71 g, 20.9 mmol) in DMF (5 mL) according to the general procedure. The crude product was purified by MPLC (SiO<sub>2</sub>, hexanes to hexanes/ethyl acetate 4:1) to afford **16** as yellow solid (1.07 g, 57%).

m.p.: 152-153 °C

*R*<sub>f</sub> = 0.60 (SiO<sub>2</sub>, hexanes/ethyl acetate 2:1)

<sup>1</sup>H-NMR (400 MHz, CDCl<sub>3</sub>): δ = 13.54 (s, 1H, H-C(7)), 8.76 (dd, *J* = 4.6, 1.7 Hz, 1H, H-C(4)), 8.33 (dd, *J* = 8.1, 1.7 Hz, 1H, H-C(1)), 7.98 – 7.95 (m, 2H, H-C(11)), 7.40 (dd, *J* = 8.1, 4.6 Hz, 1H, H-C(5)), 7.38 – 7.35 (m, 2H, H-C(12)), 2.47 (s, 3H, H-C(14))

<sup>13</sup>C-NMR (101 MHz, CDCl<sub>3</sub>): δ = 192.2 (C(9)), 162.8 (C(6)), 161.1 (C(3)), 152.2 (C(4)), 144.1 (C(13)), 135.3 (C(10)), 132.2 (C(1)), 129.7 (C(12)), 128.8 (C(11)), 124.8 (C(2)), 120.1 (C(5)), 109.5 (C(8)), 21.9 (C(14))

IR:  $\tilde{\nu}$  = 3038 (w), 1585 (m), 1558 (m), 1506 (m), 1458 (w), 1327 (m), 1245 (w), 1174 (m), 1073 (w), 968 (w), 828 (m), 786 (m), 750 (s)

HRMS (APPI, CH<sub>2</sub>Cl<sub>2</sub>/toluene, positive mode) calcd. for C<sub>15</sub>H<sub>12</sub>NO<sub>2</sub>S [M+H]<sup>+</sup> 270.0583, found 270.0586

**(4-(Dimethylamino)phenyl)(3-hydroxythieno[2,3-b]pyridin-2-yl)methanone (17)**

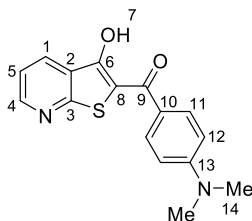

(4-(Dimethylamino)phenyl)(3-hydroxythieno[2,3-b]pyridin-2-yl)methanone (**17**) was prepared from 2-((2-(4-(dimethylamino)phenyl)-2-oxoethyl)thio)nicotinic acid (**14**) (2.00 g, 6.32 mmol), and sodium acetate (1.56 g, 19.0 mmol) in DMF (8 mL) according to the

general procedure. The crude product was purified by column chromatography (SiO<sub>2</sub>, ethyl acetate/hexanes 7:1) to afford **17** as orange solid (1.30 g, 69%).

m.p.: 190-191 °C

*R*<sub>f</sub> = 0.79 (SiO<sub>2</sub>, ethyl acetate)

<sup>1</sup>H-NMR (400 MHz, (CD<sub>3</sub>)<sub>2</sub>CO): δ = 8.79 (dd, *J* = 4.6, 1.7 Hz, 1H, H-C(4)), 8.36 (dd, *J* = 8.1, 1.7 Hz, 1H, H-C(1)), 8.11 – 8.07 (m, 2H, H-C(11)), 7.55 (dd, *J* = 8.1, 4.6 Hz, 1H, H-C(5)), 6.91 – 6.87 (m, 2H, H-C(12)), 3.15 (s, 6H, H-C(14))

<sup>13</sup>C-NMR (101 MHz, (CD<sub>3</sub>)<sub>2</sub>CO): δ = 189.9 (C(9)), 163.5 (C(6)), 161.4 (C(3)), 155.0 (C(13)), 153.1 (C(4)), 132.2 (C(1)), 131.9 (C(11)), 125.3 (C(2)), 124.8 (C(10)), 121.2 (C(5)), 112.0 (C(12)), 108.9 (C(8)), 40.1 (C(14))

IR:  $\tilde{\nu}$  = 3060 (w), 2913 (w), 1607 (w), 1557 (m), 1504 (s), 1373 (m), 1330 (m), 1260 (w), 1161 (w), 1074 (m), 894 (m), 806 (s), 755 (s)

HRMS (APPI, CH<sub>2</sub>Cl<sub>2</sub>, positive mode) calcd. for C<sub>16</sub>H<sub>15</sub>N<sub>2</sub>O<sub>2</sub>S [M+H]<sup>+</sup> 299.0849, found 299.0853

## Synthesis of vinyl chlorides 18-20

Chloride **21** was synthesized according to a published protocol.<sup>[2]</sup>

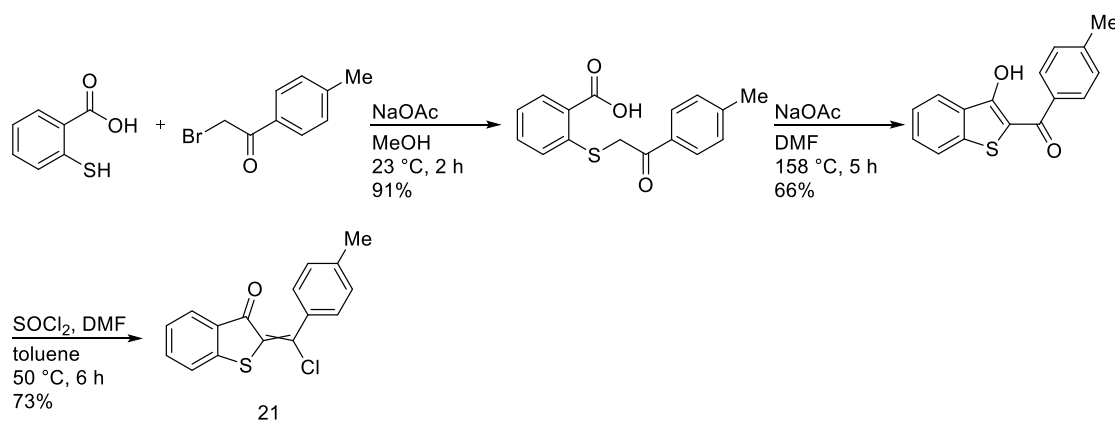

**Scheme S4:** Synthesis of vinyl chloride **21**.

## 2-(Chloro(4-(dimethylamino)phenyl)methylene)benzo[b]thiophen-3(2H)-one (18)

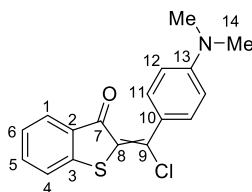

To a solution of (4-(dimethylamino)phenyl)(3-hydroxybenzo[b]thiophen-2-yl)methanone (**15**) (400 mg, 1.35 mmol) in toluene (10 mL) was added thionyl chloride (800 mg, 488  $\mu$ L, 6.73 mmol) and *N,N*-dimethylformamide (98.3 mg, 105  $\mu$ L, 1.35 mmol) and the mixture was stirred at 23 °C for 24 h. The reaction mixture was neutralized with sat. aq. NaHCO<sub>3</sub>, extracted with CH<sub>2</sub>Cl<sub>2</sub> and dried (MgSO<sub>4</sub>). The solvent was removed *in vacuo* and the crude product was purified by column chromatography (Al<sub>2</sub>O<sub>3</sub>, CH<sub>2</sub>Cl<sub>2</sub>) to afford **18** as red solid (303 mg, 71%).  
m.p.: 143-144 °C

$R_f$  = 0.56 (SiO<sub>2</sub>, hexanes/ethyl acetate 2:1)

*Z*-isomer:

<sup>1</sup>H-NMR (500 MHz, CD<sub>2</sub>Cl<sub>2</sub>):  $\delta$  = 7.73 (ddd,  $J$  = 7.7, 1.4, 0.7 Hz, 1H, H-C(1)), 7.60 – 7.57 (m, 2H, H-C(11)), 7.56 – 7.54 (m, 1H, H-C(5)), 7.47 (dt,  $J$  = 7.9, 0.9 Hz, 1H, H-C(4)), 7.26 (ddd,  $J$  = 8.0, 7.2, 1.0 Hz 2H, H-C(6)), 6.71 – 6.65 (m, 2H, H-C(12)), 3.07 (s, 6H, H-C(14))

<sup>13</sup>C-NMR (101 MHz, CD<sub>2</sub>Cl<sub>2</sub>):  $\delta$  = 183.3 (C(7)), 152.7 (C(13)), 145.6 (C(9)), 144.3 (C(3)), 135.1 (C(5)), 134.1 (C(2)), 132.0 (C(11)), 127.0 (C(1)), 125.6 (C(6)), 123.7 (C(4)), 122.4 (C(10)), 110.6 (C(12)), 40.3 (C(14)), (C(8)) could not be clearly assigned

IR:  $\tilde{\nu}$  = 2894 (w), 1663 (m), 1598 (m), 1548 (w), 1509 (s), 1442 (m), 1368 (m), 1280 (w), 1235 (m), 1184 (m), 1058(m), 947 (w), 866 (w), 784 (m), 775 (m), 734 (s)

HRMS (APPI, CH<sub>2</sub>Cl<sub>2</sub>, positive mode) calcd. for C<sub>17</sub>H<sub>15</sub>ClNOS [M+H]<sup>+</sup> 316.0557, found 316.0564.

## 2-(Chloro(*p*-tolyl)methylene)thieno[2,3-*b*]pyridin-3(2H)-one (19)

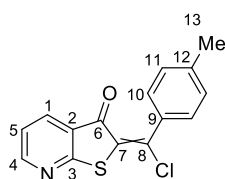

To a solution of (3-hydroxythieno[2,3-*b*]pyridin-2-yl)(*p*-tolyl)methanone (**16**) (300 mg, 1.11 mmol) in toluene (10 mL) was added thionyl chloride (663 mg, 404  $\mu$ L, 5.57 mmol), and

*N,N*-dimethylformamide (81.4 mg, 86.6  $\mu$ L, 1.11 mmol) and the mixture was heated to 50  $^{\circ}$ C for 4 h. After cooling to 23  $^{\circ}$ C, the mixture was neutralized with sat. aq.  $\text{NaHCO}_3$ , extracted with  $\text{CH}_2\text{Cl}_2$  and dried ( $\text{MgSO}_4$ ). The solvent was removed *in vacuo* and the crude product was purified by column chromatography ( $\text{Al}_2\text{O}_3$ ,  $\text{CH}_2\text{Cl}_2$ ) to afford **19** as yellow solid (294 mg, 92%).

m.p.: 187-188  $^{\circ}$ C

$R_f$  = 0.29 ( $\text{SiO}_2$ , hexanes/ethyl acetate 5:1)

*Z*-Isomer:

$^1\text{H}$ -NMR (400 MHz,  $\text{CD}_2\text{Cl}_2$ ):  $\delta$  = 8.67 (dd,  $J$  = 4.8, 1.8 Hz, 1H, H-C(4)), 7.93 (dd,  $J$  = 7.7, 1.8 Hz, 1H, H-C(1)), 7.49 – 7.45 (m, 2H, H-C(10)), 7.29 – 7.25 (m, 2H, H-C(11)), 7.23 (dd,  $J$  = 7.7, 4.8 Hz, 1H, H-C(5)), 2.43 (s, 3H, H-C(13))

$^{13}\text{C}$ -NMR (101 MHz,  $\text{CD}_2\text{Cl}_2$ ):  $\delta$  = 182.3 (C(6)), 166.4 (C(3)), 156.3 (C(4)), 144.8 (C(8)), 141.9 (C(12)), 134.7 (C(1)), 133.4 (C(9)), 132.3 (C(7)), 129.5 (C(10)), 129.2 (C(11)), 127.7 (C(2)), 121.2 (C(5)), 21.7 (C(13))

IR:  $\tilde{\nu}$  = 3025 (w), 2916 (w), 1671 (s), 1565 (m), 1538 (s), 1502 (w), 1461 (w), 1395 (s), 1288 (m), 1231 (m), 1185 (w), 1092 (w), 1060 (m), 870 (w), 838 (w), 771 (s), 757 (s)

HRMS (APPI,  $\text{CH}_2\text{Cl}_2$ /acetonitrile, positive mode) calcd. for  $\text{C}_{15}\text{H}_{11}\text{ClNOS}$   $[\text{M}+\text{H}]^+$  288.0244, found 288.0248

## 2-(Chloro(4-(dimethylamino)phenyl)methylene)thieno[2,3-b]pyridin-3(2H)-one (**20**)

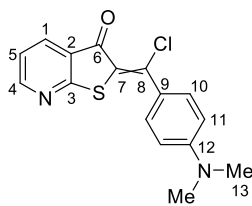

To a solution of (4-(dimethylamino)phenyl)(3-hydroxythieno[2,3-b]pyridin-2-yl)methanone (**17**) (150 mg, 0.503 mmol) in toluene (4 mL) was added thionyl chloride (299 mg, 182  $\mu$ L, 2.51 mmol) and *N,N*-dimethylformamide (36.8 mg, 39.1  $\mu$ L, 0.503 mmol) and the mixture was stirred at 23  $^{\circ}$ C for 24 h. The reaction mixture was neutralized with sat. aq.  $\text{NaHCO}_3$ , extracted with  $\text{CH}_2\text{Cl}_2$  and dried ( $\text{MgSO}_4$ ). The solvent was removed *in vacuo* and the crude product was purified by column chromatography ( $\text{Al}_2\text{O}_3$ ,  $\text{CH}_2\text{Cl}_2$ ) to afford **20** as red solid (129 mg, 81%).

m.p.: 171-172  $^{\circ}$ C

$R_f$  = 0.50 ( $\text{SiO}_2$ , hexanes/ethyl acetate 1:1)

*E*-Isomer:

$^1\text{H-NMR}$  (601 MHz,  $\text{CDCl}_3$ ):  $\delta$  = 8.66 (dd,  $J$  = 4.8, 1.8 Hz, 1H, H-C(4)), 7.97 (dd,  $J$  = 7.7, 1.8 Hz, 1H, H-C(1)), 7.65 – 7.63 (m, 2H, H-C(10)), 7.19 (dd,  $J$  = 7.7, 4.8 Hz, 1H, H-C(5)), 6.74 – 6.70 (m, 2H, H-C(11)), 3.08 (s, 6H, H-C(13))

$^{13}\text{C-NMR}$  (151 MHz,  $\text{CDCl}_3$ ):  $\delta$  = 181.6 (C(6)), 166.3 (C(3)), 155.4 (C(4)), 152.2 (C(12)), 147.3 (C(8)), 134.4 (C(1)), 131.9 (C(10)), 128.2 (C(2)), 122.9 (C(9)), 120.5 (C(5)), 111.0 (C(11)), 40.5 (C(13)), (C(7)) could not be clearly assigned

IR:  $\tilde{\nu}$  = 2908 (w), 2818 (w), 1656 (s), 1606 (s), 1578 (m), 1566 (m), 1552 (m), 1504 (s), 1408 (m), 1370 (m), 1286 (m), 1192 (m), 1095 (w), 1058 (s), 945 (w), 869 (w), 809 (m), 785 (m), 758 (w)

HRMS (APPI,  $\text{CH}_2\text{Cl}_2$ /acetonitrile, positive mode) calcd. for  $\text{C}_{16}\text{H}_{14}\text{ClN}_2\text{OS}$   $[\text{M}+\text{H}]^+$  317.0510, found 317.0513

## Synthesis of Diaryl-HTIs 1-10

Benzothiophenones **22** and **23** were synthesized according to published protocols.<sup>[4,5]</sup>

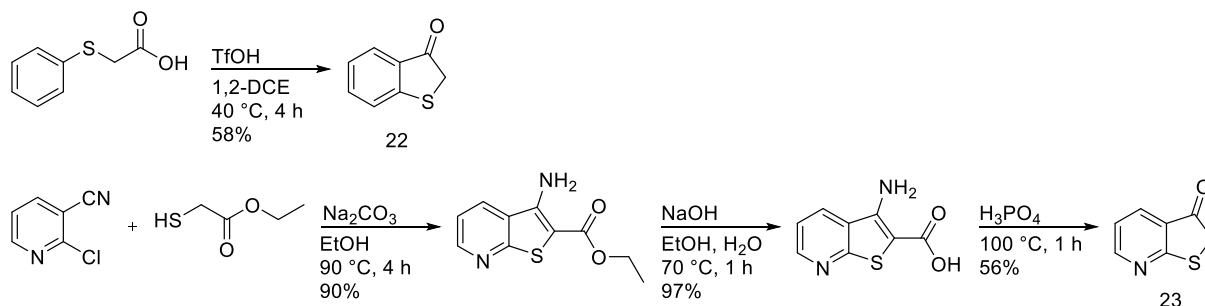

**Scheme S5:** Synthesis of benzothiophenones **22** and **23**.

## 2-(Bis(4-(dimethylamino)phenyl)methylene)benzo[*b*]thiophen-3(2H)-one (**1**)

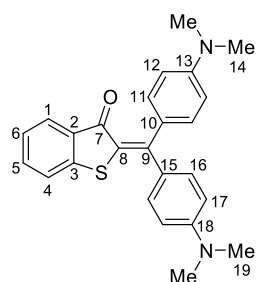

2-(Bis(4-(dimethylamino)phenyl)methylene)benzo[*b*]thiophen-3(2H)-one (**1**) was prepared from chloride (**18**) (200 mg, 0.633 mmol) and (4-(dimethylamino)phenyl)boronic acid (157 mg, 0.950 mmol). The crude product was purified by column chromatography (Al<sub>2</sub>O<sub>3</sub>, hexanes/ethyl acetate 3:1) and recrystallized from ethyl acetate to afford **1** (138 mg, 55%) as red crystals.

m.p.: 244-245 °C

*R*<sub>f</sub> = 0.32 (SiO<sub>2</sub>, hexanes/ethyl acetate 3:1)

*E*-Isomer:

<sup>1</sup>H-NMR (601 MHz, CD<sub>2</sub>Cl<sub>2</sub>): δ = 7.76 (ddd, *J* = 7.8, 1.4, 0.7 Hz, 1H, H-C(1)), 7.49 (ddd, *J* = 7.9, 7.1, 1.3 Hz, 1H, H-C(5)), 7.41 (dt, *J* = 7.9, 0.9 Hz, 1H, H-C(4)), 7.31 – 7.29 (m, 2H, H-C(16)), 7.22 (ddd, *J* = 7.7, 7.1, 1.0 Hz, 1H, H-C(6)), 7.19 – 7.16 (m, 2H, H-C(11)), 6.70 – 6.68 (m, 2H, H-C(17)), 6.67 – 6.64 (m, 2H, H-C(12)), 3.03 (s, 6H, H-C(14 or 19)), 3.03 (s, 6H, H-C(14 or 19))

$^{13}\text{C}$ -NMR (151 MHz,  $\text{CD}_2\text{Cl}_2$ ):  $\delta$  = 185.8 (C(7)), 154.8 (C(9)), 151.8 (C(13)), 151.7 (C(18)), 146.0 (C(3)), 134.5 (C(2)), 133.8 (C(5)), 133.20 (C(11)), 133.17 (C(16)), 130.2 (C(15)), 127.5 (C(10)), 126.7 (C(8)), 125.8 (C(1)), 124.7 (C(6)), 123.5 (C(4)), 111.3 (C(17)), 111.0 (C(12)), 40.4 (C(14 or 19)), 40.3 (C(14 or 19))

IR:  $\tilde{\nu}$  = 2794 (w), 1649 (w), 1597 (s), 1552 (w), 1521 (w), 1476 (s), 1442 (m), 1359 (s), 1311 (m), 1214 (m), 1167 (m), 1123 (w), 1048 (s), 958 (m), 864 (w), 820 (s), 741 (s), 688 (m)

HRMS (APPI,  $\text{CH}_2\text{Cl}_2$ /acetonitrile, positive mode) calcd. for  $\text{C}_{25}\text{H}_{25}\text{N}_2\text{OS}$   $[\text{M}+\text{H}]^+$  401.1682, found 401.1689

## 2-((4-(Dimethylamino)phenyl)(*p*-tolyl)methylene)benzo[*b*]thiophen-3(2H)-one (**2**)

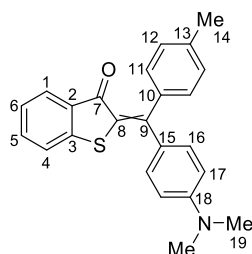

2-((4-(Dimethylamino)phenyl)(*p*-tolyl)methylene)benzo[*b*]thiophen-3(2H)-one (**2**) was prepared from chloride (**18**) (200 mg, 0.633 mmol) and *p*-tolylboronic acid (129 mg, 0.950 mmol). The crude product was purified by MPLC ( $\text{Al}_2\text{O}_3$ , hexanes to hexanes/ethyl acetate 9:1) and recrystallized from methanol to afford **2** (157 mg, 67%) as red crystals.

m.p.: 171-172 °C

$R_f$  = 0.70 ( $\text{SiO}_2$ , hexanes/ethyl acetate 2:1)

Z-Isomer:

$^1\text{H}$ -NMR (601 MHz,  $\text{CD}_2\text{Cl}_2$ ):  $\delta$  = 7.72 (ddd,  $J$  = 7.7, 1.4, 0.7 Hz, 1H, H-C(1)), 7.53 – 7.48 (m, 1H, H-C(5)), 7.44 (dt,  $J$  = 7.9, 0.9 Hz, 1H, H-C(4)), 7.32 – 7.30 (m, 2H, H-C(16)), 7.24 – 7.18 (m, 3H, H-C(6 and 12)), 7.13 – 7.11 (m, 2H, H-C(11)), 6.69 – 6.66 (m, 2H, H-C(17)), 3.02 (s, 6H, H-C(19)), 2.42 (s, 3H, H-C(14))

$^{13}\text{C}$ -NMR (151 MHz,  $\text{CD}_2\text{Cl}_2$ ):  $\delta$  = 186.5 (C(7)), 152.6 (C(9)), 151.6 (C(18)), 146.1 (C(3)), 139.0 (C(13)), 138.1 (C(10)), 134.34 (C(5)), 133.6 (C(2)), 132.6 (C(16)), 130.4 (C(11)), 129.3 (C(15)), 129.1 (C(12)), 126.80 (C(1)), 125.04 (C(6)), 123.6 (C(4)), 111.4 (C(17)), 40.28 (C(19)), 21.6 (C(14)), (C(8)) could not be clearly assigned

IR:  $\tilde{\nu}$  = 2888 (w), 2811 (w), 1654 (m), 1600 (s), 1501 (s), 1441 (m), 1364 (m), 1310 (w), 1280 (m), 1221 (w), 1198 (m), 1154 (w), 1050 (s), 959 (w), 815 (s), 746 (s), 649 (w)

HRMS (APPI, CH<sub>2</sub>Cl<sub>2</sub>, positive mode) calcd. for C<sub>24</sub>H<sub>21</sub>NOS [M]<sup>+</sup> 371.1338, found 371.1338

**4-((4-(Dimethylamino)phenyl)(3-oxobenzo[b]thiophen-2(3H)-ylidene) methyl) benzonitrile (3)**

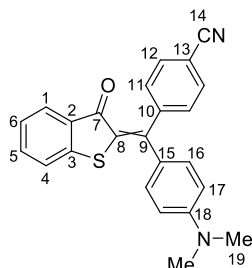

4-((4-(Dimethylamino)phenyl)(3-oxobenzo[b]thiophen-2(3H)-ylidene) methyl) benzonitrile (**3**) was prepared from chloride (**18**) (200 mg, 0.633 mmol) and (4-cyanophenyl)boronic acid (140 mg, 0.950 mmol). The crude product was purified by column chromatography (Al<sub>2</sub>O<sub>3</sub>, hexanes/ethyl acetate 2:1) and recrystallized from ethanol to afford **3** (200 mg, 83%) as red crystals.

m.p.: 178-179 °C

*R*<sub>f</sub> = 0.60 (SiO<sub>2</sub>, hexanes/ethyl acetate 2:1)

Z-Isomer:

<sup>1</sup>H-NMR (601 MHz, CD<sub>2</sub>Cl<sub>2</sub>): δ = 7.71 – 7.68 (m, 3H, H-C(1 and 12)), 7.54 (ddd, *J* = 7.9, 7.2, 1.3 Hz, 1H, H-C(5)), 7.47 (dt, *J* = 7.9, 0.9 Hz, 1H, H-C(4)), 7.35 – 7.33 (m, 2H, H-C(11)), 7.31 – 7.29 (m, 2H, H-C(16)), 7.24 (ddd, *J* = 7.7, 7.2, 1.0 Hz, 1H, H-C(6)), 6.69 – 6.67 (m, 2H, H-C(17)), 3.03 (s, 6H, H-C(19))

<sup>13</sup>C-NMR (151 MHz, CD<sub>2</sub>Cl<sub>2</sub>): δ = 186.8 (C(7)), 151.7 (C(18)), 148.9 (C(9)), 146.4 (C(10)), 146.0 (C(3)), 134.8 (C(5)), 132.9 (C(2)), 132.4 (C(16)), 132.3 (C(12)), 130.8 (C(11)), 127.4 (C(15)), 126.9 (C(1)), 125.4 (C(6)), 123.8 (C(4)), 119.3 (C(14)), 111.9 (C(13)), 111.6 (C(17)), 40.2 (C(19)), (C(8)) could not be clearly assigned

IR:  $\tilde{\nu}$  = 2818 (w), 2224 (w), 1664 (m), 1601 (m), 1548 (m), 1521 (s), 1494 (m), 1440 (m), 1371 (m), 1280 (m), 1221 (w), 1200 (m), 1166 (w), 1119 (w), 1059 (s), 1019 (w), 949 (m), 819 (s), 745 (s), 647 (m)

HRMS (APPI, CH<sub>2</sub>Cl<sub>2</sub>, positive mode) calcd. for C<sub>24</sub>H<sub>18</sub>N<sub>2</sub>OS [M+H]<sup>+</sup> 383.1213, found 383.1224

**4-((3-Oxobenzo[b]thiophen-2(3H)-ylidene)(*p*-tolyl)methyl)benzonitrile (4)**

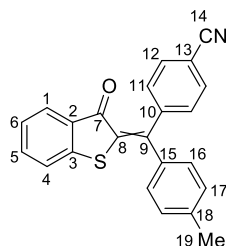

4-((3-Oxobenzo[b]thiophen-2(3H)-ylidene)(*p*-tolyl)methyl)benzonitrile (**4**) was prepared from chloride (**21**) (184 mg, 0.642 mmol) and (4-cyanophenyl)boronic acid (141 mg, 0.962 mmol). The crude product was purified by column chromatography (Al<sub>2</sub>O<sub>3</sub>, hexanes/ethyl acetate 3:1) and recrystallized from *n*-heptane to afford **4** (174 mg, 77%) as orange crystals.

m.p.: 155-156 °C

*R*<sub>f</sub> = 0.55 (SiO<sub>2</sub>, hexanes/ethyl acetate 3:1)

*Z*-isomer:

<sup>1</sup>H-NMR (601 MHz, (CD<sub>3</sub>)<sub>2</sub>CO): δ = 7.81 – 7.79 (m, 2H, H-C(12)), 7.70 (ddd, *J* = 7.8, 1.3, 0.7 Hz, 1H, H-C(1)), 7.67 (ddd, *J* = 8.4, 7.2, 1.3 Hz, 1H, H-C(5)), 7.60 (dt, *J* = 7.9, 0.9 Hz, 1H, H-C(4)), 7.52 – 7.50 (m, 2H, H-C(11)), 7.37 – 7.33 (m, 3H, H-C(6 and 16)), 7.32 – 7.30 (m, 2H, H-C(17)), 2.38 (s, 3H, H-C(19))

<sup>13</sup>C-NMR (151 MHz, (CD<sub>3</sub>)<sub>2</sub>CO): δ = 186.9 (C(7)), 148.4 (C(9)), 146.2 (C(3)), 146.0 (C(10)), 140.9 (C(18)), 139.1 (C(15)), 136.27 (C(5)), 132.81 (C(12)), 132.78 (C(2)), 131.23 (C(11)), 130.33 (C(16)), 130.27 (C(17)), 127.4 (C(1)), 126.4 (C(6)), 124.7 (C(4)), 119.4 (C(14)), 112.4 (C(13)), 21.3 (C(19)), (C(8)) could not be clearly assigned

IR:  $\tilde{\nu}$  = 2227 (m), 1666 (s), 1587 (m), 1529 (m), 1497 (w), 1448 (m), 1403 (w), 1280 (m), 1218 (w), 1047 (s), 1016 (m), 951 (w), 823 (m), 741 (s)

HRMS (APPI, CH<sub>2</sub>Cl<sub>2</sub>, positive mode) calcd. for C<sub>23</sub>H<sub>16</sub>NOS [M+H]<sup>+</sup> 354.0947, found 354.0956

#### 4,4'-((3-Oxobenzo[b]thiophen-2(3H)-ylidene)methylene)dibenzonitrile (**5**)

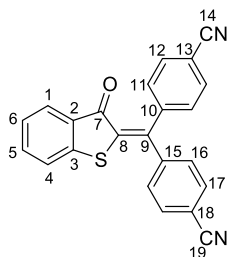

To a solution of 4,4'-carbonyldibenzonitrile (110 mg, 0.476 mmol) in dry 1,2-dichloroethane (3 mL) was added  $\text{BBr}_3$  (1.0 M in  $\text{CH}_2\text{Cl}_2$ , 536 mg, 0.536 mL, 2.14 mmol) under inert atmosphere. The mixture was subsequently transferred to a solution of benzo[b]thiophen-3(2H)-one (**22**) (100 mg, 0.666 mmol) in dry 1,2-dichloroethane (3 mL) and stirred at 23 °C for 24 h under inert atmosphere. After the reaction was quenched by the addition of sat. aq.  $\text{NH}_4\text{Cl}$ , the aqueous phase was extracted with ethyl acetate and dried ( $\text{MgSO}_4$ ). The crude product was purified by MPLC ( $\text{Al}_2\text{O}_3$ , hexanes to hexanes/ethyl acetate 7:3) and recrystallization from methanol to afford **5** as orange crystals (116 mg, 67%).

m.p.: 208-209 °C

$R_f$  = 0.58 ( $\text{SiO}_2$ , hexanes/ethyl acetate 2:1)

$^1\text{H-NMR}$  (601 MHz,  $\text{CDCl}_3$ ):  $\delta$  = 7.76 (ddd,  $J$  = 7.7, 1.4, 0.7 Hz, 1H, H-C(1)), 7.74 – 7.72 (m, 2H, H-C(17)), 7.71 – 7.69 (m, 2H, H-C(12)), 7.59 (ddd,  $J$  = 7.9, 7.2, 1.3 Hz, 1H, H-C(5)), 7.53 – 7.51 (m, 2H, H-C(16)), 7.40 (dt,  $J$  = 8.0, 0.8 Hz, 1H, H-C(4)), 7.38 – 7.35 (m, 2H, H-C(11)), 7.28 (ddd,  $J$  = 7.8, 7.3, 0.9 Hz, 1H, H-C(6))

$^{13}\text{C-NMR}$  (151 MHz,  $\text{CDCl}_3$ ):  $\delta$  = 186.8 (C(7)), 145.1 (C(15)), 144.9 (C(3)), 144.6 (C(9)), 143.4 (C(10)), 136.0 (C(5)), 134.1 (C(8)), 132.7 (C(17)), 132.5 (C(12)), 131.6 (C(2)), 130.3 (C(16)), 130.2 (C(11)), 127.5 (C(1)), 126.1 (C(6)), 123.7 (C(4)), 118.6 (C(14)), 118.2 (C(19)), 113.4 (C(18)), 112.8 (C(13))

IR:  $\tilde{\nu}$  = 2224 (m), 1673 (s), 1586 (m), 1563 (m), 1495 (w), 1450 (m), 1403 (w), 1280 (s), 1217 (w), 1053 (s), 1016 (m), 835 (s), 745 (s), 636 (w), 568 (m), 553 (s)

HRMS (APPI,  $\text{CH}_2\text{Cl}_2$ , positive mode) calcd. for  $\text{C}_{23}\text{H}_{12}\text{N}_2\text{OS}$   $[\text{M}]^+$  364.0665, found 364.0667

Diaryl-HTIs **1-4** and **6-9** were synthesized *via Suzuki-Miyaura* cross-coupling adopting a published protocol:<sup>[2]</sup> Chlorides **18-21** (1.0 equiv.), boronic acid (1.5 equiv.) and  $\text{K}_2\text{CO}_3$  (2.0 equiv.) were dissolved in 1,4-dioxane and water (10 vol%). The solution was degassed with nitrogen (15 min) before  $\text{Pd}(\text{PPh}_3)_4$  (5 mol%) was added. The reaction mixture was heated to 80 °C for 4 to 8 h under inert gas atmosphere. After cooling to 23 °C, sat. aq.  $\text{Na}_2\text{CO}_3$  was

added. The aqueous phase was extracted with CH<sub>2</sub>Cl<sub>2</sub>, dried (MgSO<sub>4</sub>) and the solvent removed *in vacuo*. The crude product was purified by column chromatography, MPLC and/or recrystallization.

**2-(Bis(4-(dimethylamino)phenyl)methylene)thieno[2,3-b]pyridin-3(2H)-one (6)**

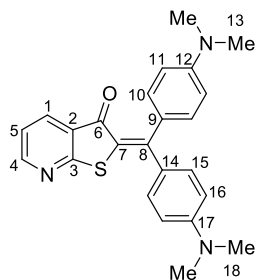

2-(Bis(4-(dimethylamino)phenyl)methylene)thieno[2,3-b]pyridin-3(2H)-one (**6**) was prepared from chloride (**20**) (200 mg, 0.631 mmol) and (4-(dimethylamino)phenyl)boronic acid (156 mg, 947 mmol). The crude product was purified by column chromatography (Al<sub>2</sub>O<sub>3</sub>, hexanes/ethyl acetate 2:1) and recrystallized from methanol to afford **6** (166 mg, 65%) as red crystals.

m.p.: 222-223 °C

$R_f$  = 0.56 (SiO<sub>2</sub>, hexanes/ethyl acetate 1:1)

<sup>1</sup>H-NMR (601 MHz, CD<sub>2</sub>Cl<sub>2</sub>):  $\delta$  = 8.59 (dd,  $J$  = 4.8, 1.8 Hz, 1H, H-C(4)), 7.99 (dd,  $J$  = 7.7, 1.8 Hz, 1H, H-C(1)), 7.33 – 7.30 (m, 2H, H-C(10)), 7.19 – 7.16 (m, 3H, H-C(5 and 15)), 6.71 – 6.69 (m, 2H, H-C(11)), 6.66 – 6.64 (m, 2H, H-C(16)), 3.04 (s, 6H, H-C(13 or 18)), 3.04 (s, 6H, H-C(13 or 18))

<sup>13</sup>C-NMR (151 MHz, CD<sub>2</sub>Cl<sub>2</sub>):  $\delta$  = 184.1 (C(6)), 167.9 (C(3)), 156.4 (C(8)), 154.6 (C(4)), 152.1 (C(17)), 151.9 (C(12)), 134.0 (C(1)), 133.5 (C(10)), 133.4 (C(15)), 129.6 (C(9)), 128.6 (C(2)), 127.4 (C(14)), 124.9 (C(7)), 120.0 (C(5)), 111.3 (C(11)), 111.0 (C(16)), 40.4 (C(13 or 18)), 40.3 (C(13 or 18))

IR:  $\tilde{\nu}$  = 2224 (m), 1673 (s), 1586 (m), 1563 (m), 1495 (w), 1450 (m), 1403 (w), 1280 (s), 1217 (w), 1053 (s), 1016 (m), 835 (s), 745 (s), 636 (w), 568 (m), 553 (s)

HRMS (APPI, CH<sub>2</sub>Cl<sub>2</sub>, positive mode) calcd. for C<sub>24</sub>H<sub>23</sub>N<sub>3</sub>OS [M]<sup>+</sup> 401.1556, found 401.1561

**2-((4-(Dimethylamino)phenyl)(*p*-tolyl)methylene)thieno[2,3-*b*]pyridin-3(2H)-one (7)**

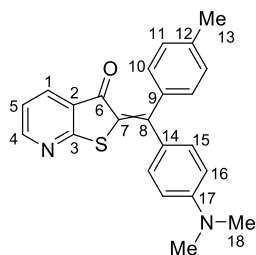

2-((4-(Dimethylamino)phenyl)(*p*-tolyl)methylene)thieno[2,3-*b*]pyridin-3(2H)-one (**7**) was prepared from chloride (**20**) (150 mg, 0.473 mmol) and *p*-tolylboronic acid (96.6 mg, 0.710 mmol). The crude product was purified by MPLC (SiO<sub>2</sub>, hexanes to hexanes/ethyl acetate 1:1) and recrystallized from methanol to afford **7** (159 mg, 90%) as red crystals.

m.p.: 161-162 °C

*R*<sub>f</sub> = 0.63 (SiO<sub>2</sub>, hexanes/ethyl acetate 1:1)

*Z*-Isomer:

<sup>1</sup>H-NMR (601 MHz, CD<sub>2</sub>Cl<sub>2</sub>): δ = 8.61 (dd, *J* = 4.7, 1.8 Hz, 1H, H-C(4)), 7.94 (dd, *J* = 7.7, 1.8 Hz, 1H, H-C(1)), 7.33 – 7.31 (m, 2H, H-C(15)), 7.21 – 7.19 (m, 2H, H-C(11)), 7.18 (dd, *J* = 7.7, 4.8 Hz, 1H, H-C(5)), 7.14 – 7.12 (m, 2H, H-C(10)), 6.70 – 6.67 (m, 2H, H-C(16)), 3.03 (s, 6H, H-C(18)), 2.42 (s, 3H, H-C(13))

<sup>13</sup>C-NMR (151 MHz, CD<sub>2</sub>Cl<sub>2</sub>): δ = 185.0 (C(6)), 168.2 (C(3)), 155.1 (C(4)), 154.2 (C(8)), 151.8 (C(17)), 139.3 (C(12)), 138.1 (C(9)), 134.2 (C(1)), 132.8 (C(15)), 130.4 (C(10)), 129.1 (C(11)), 128.7 (C(14)), 127.8 (C(6)), 120.4 (C(5)), 111.4 (C(16)), 40.3 (C(18)), 21.6 (C(13)), (C(7)) could not be clearly assigned

IR:  $\tilde{\nu}$  = 2915 (w), 2852 (w), 2818 (w), 1662 (m), 1644 (w), 1603 (m), 1567 (m), 1491 (m), 1411 (m), 1368 (w), 1277 (w), 1204 (w), 1091 (m), 959 (w), 865 (m), 763 (s)

HRMS (APPI, CH<sub>2</sub>Cl<sub>2</sub>, positive mode) calcd. for C<sub>23</sub>H<sub>20</sub>N<sub>2</sub>OS [M]<sup>+</sup> 372.1291, found 372.1291

**4-((4-(Dimethylamino)phenyl)(3-oxothieno[2,3-*b*]pyridin-2(3H)-ylidene)methyl)benzonitrile (8)**

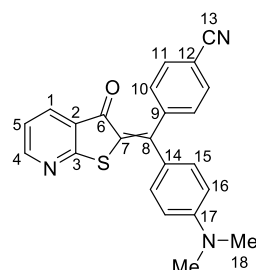

4-((4-(Dimethylamino)phenyl)(3-oxothieno[2,3-b]pyridin-2(3H)-ylidene)methyl) benzonitrile (**8**) was prepared from chloride (**20**) (300 mg, 0.947 mmol) and (4-cyanophenyl)boronic acid (209 mg, 1.42 mmol). The crude product was purified by column chromatography (Al<sub>2</sub>O<sub>3</sub>, hexanes/ethyl acetate 1:1) and recrystallized from ethyl acetate to afford **8** (266 mg, 73%) as red crystals.

m.p.: 247-248 °C

*R*<sub>f</sub> = 0.55 (SiO<sub>2</sub>, hexanes/ethyl acetate 1:1)

*Z*-Isomer:

<sup>1</sup>H-NMR (601 MHz, (CD<sub>3</sub>)<sub>2</sub>CO):  $\delta$  = 8.70 (dd, *J* = 4.8, 1.8 Hz, 1H, H-C(4)), 7.97 (dd, *J* = 7.7, 1.8 Hz, 1H, H-C(1)), 7.83 – 7.80 (m, 2H, H-C(11)), 7.48 – 7.45 (m, 2H, H-C(10)), 7.37 (dd, *J* = 7.7, 4.8 Hz, 1H, H-C(5)), 7.33 – 7.30 (m, 2H, H-C(15)), 6.81 – 6.78 (m, 2H, H-C(16)), 3.07 (s, 6H, H-C(18))

<sup>13</sup>C-NMR (151 MHz, (CD<sub>3</sub>)<sub>2</sub>CO):  $\delta$  = 185.1 (C(6)), 168.1 (C(3)), 156.1 (C(4)), 152.5 (C(17)), 150.7 (C(8)), 146.8 (C(9)), 134.6 (C(1)), 132.7 (C(15 and 11)), 131.4 (C(10)), 127.34 (C(14)), 127.28 (C(2)), 121.5 (C(5)), 119.4 (C(13)), 112.3 (C(12)), 112.2 (C(16)), 40.0 (C(18)), (C(7)) could not be clearly assigned

IR:  $\tilde{\nu}$  = 2906 (w), 2223 (m), 1652 (m), 1600 (m), 1485 (s), 1429 (m), 1394 (m), 1371 (m), 1319 (m), 1274 (m), 1208 (s), 1123 (m), 1057 (s), 957 (s), 852 (m), 813 (m), 757 (s), 580 (s)

HRMS (APPI, CH<sub>2</sub>Cl<sub>2</sub>, positive mode) calcd. for C<sub>23</sub>H<sub>17</sub>N<sub>3</sub>OS [M]<sup>+</sup> 383.1087, found 383.1084

#### 4-((3-Oxothieno[2,3-b]pyridin-2(3H)-ylidene)(*p*-tolyl)methyl)benzonitrile (**9**)

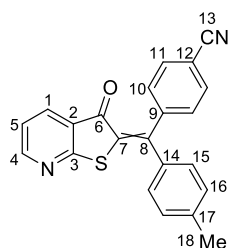

4-((3-Oxothieno[2,3-b]pyridin-2(3H)-ylidene)(*p*-tolyl)methyl)benzonitrile (**9**) was prepared from chloride (**19**) (239 mg, 0.831 mmol) and (4-cyanophenyl)boronic acid (183 mg, 1.25 mmol). The crude product was purified by MPLC (Al<sub>2</sub>O<sub>3</sub>, hexanes to hexanes/ethyl acetate 4:1) and recrystallized from methanol to afford **9** (182 mg, 62%) as orange crystals.

m.p.: 169-170 °C

*R*<sub>f</sub> = 0.62 (SiO<sub>2</sub>, hexanes/ethyl acetate 2:1)

*E*-Isomer:

$^1\text{H-NMR}$  (500 MHz,  $(\text{CD}_3)_2\text{CO}$ ):  $\delta$  = 8.71 (dd,  $J$  = 4.8, 1.8 Hz, 1H, H-C(4)), 8.01 (dd,  $J$  = 7.7, 1.8 Hz, 1H, H-C(1)), 7.83 – 7.80 (m, 2H, H-C(11)), 7.54 – 7.52 (m, 2H, H-C(10)), 7.39 (dd,  $J$  = 7.8, 4.8 Hz, 1H, H-C(5)), 7.38 – 7.34 (m, 2H, H-C(15)), 7.34 – 7.31 (m, 2H, H-C(16)), 2.39 (s, 3H, H-C(18))

$^{13}\text{C-NMR}$  (126 MHz,  $(\text{CD}_3)_2\text{CO}$ ):  $\delta$  = 185.6 (C(6)), 168.1 (C(3)), 156.8 (C(4)), 149.7 (C(8)), 145.9 (C(9)), 141.3 (C(17)), 138.8 (C(14)), 135.03 (C(1)), 132.9 (C(11)), 131.16 (C(10)), 130.38 (C(16)), 130.35 (C(15)), 127.1 (C(2)), 121.88 (C(5)), 119.3 (C(13)), 112.6 (C(12)), 21.4 (C(18)), (C(7)) could not be clearly assigned

IR:  $\tilde{\nu}$  = 2918 (w), 2224 (w), 1665 (s), 1604 (w), 1571 (s), 1527 (m), 1497 (m), 1452 (w), 1395 (s), 1279 (m), 1201 (w), 1125 (m), 1089 (m), 1050 (s), 1018 (m), 824 (s), 759 (s), 729 (m)  
HRMS (APPI,  $\text{CH}_2\text{Cl}_2$ , positive mode) calcd. for  $\text{C}_{22}\text{H}_{15}\text{N}_2\text{OS}$   $[\text{M}+\text{H}]^+$  355.0900, found 355.0907

#### 4,4'-((3-Oxothieno[2,3-b]pyridin-2(3H)-ylidene)methylene)dibenzonitrile (**10**)

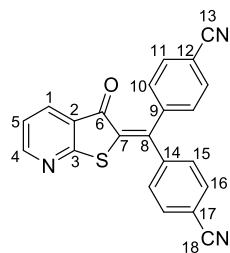

To a solution of 4,4'-carbonyldibenzonitrile (46.1 mg, 0.198 mmol) in dry 1,2-dichloroethane (1 mL) was added  $\text{BBR}_3$  (1.0 M in  $\text{CH}_2\text{Cl}_2$ , 224 mg, 0.893 mL, 0.893 mmol) under inert atmosphere. The mixture was subsequently transferred to a solution of thieno[2,3-b]pyridin-3(2H)-one (**23**) (30.0 mg, 0.198 mmol) in dry 1,2-dichloroethane (1 mL) and heated to 50 °C for 5 h. The reaction was quenched by the addition of sat. aq.  $\text{NH}_4\text{Cl}$ . The aqueous phase was extracted with ethyl acetate and dried ( $\text{MgSO}_4$ ). The crude product was purified by column chromatography ( $\text{SiO}_2$ , hexanes/ethyl acetate 1:1) and recrystallization from methanol to afford **10** as yellow crystals (38.7 mg, 53%).

m.p.: 188-189 °C

$R_f$  = 0.53 ( $\text{SiO}_2$ , hexanes/ethyl acetate 1:1)

$^1\text{H-NMR}$  (601 MHz,  $\text{CDCl}_3$ ):  $\delta$  = 8.69 (dd,  $J$  = 4.8, 1.8 Hz, 1H, H-C(4)), 7.98 (dd,  $J$  = 7.7, 1.8 Hz, 1H, H-C(1)), 7.75 – 7.73 (m, 2H, H-C(16)), 7.73 – 7.71 (m, 2H, H-C(11)),

7.53 – 7.51 (m, 2H, H-C(15)), 7.38 – 7.36 (m, 2H, H-C(10)), 7.26 (dd,  $J = 7.9, 4.8$  Hz, 1H, H-C(5))

$^{13}\text{C}$ -NMR (151 MHz,  $\text{CDCl}_3$ ):  $\delta = 185.4$  (C(6)), 167.3 (C(3)), 156.4 (C(4)), 146.3 (C(8)), 144.6 (C(14)), 143.3 (C(9)), 134.8 (C(1)), 133.5 (C(7)), 132.9 (C(16)), 132.6 (C(11)), 130.3 (C(15)), 130.1 (C(10)), 126.0 (C(2)), 121.2 (C(5)), 118.5 (C(13)), 118.1 (C(18)), 113.9 (C(17)), 113.1 (C(12))

IR:  $\tilde{\nu} = 3056$  (w), 2232 (m), 1683 (s), 1575 (s), 1541 (m), 1500 (m), 1456 (w), 1400 (s), 1286 (m), 1261 (w), 1202 (w), 1091 (m), 1053 (s), 1019 (m), 961 (m), 847 (m), 761 (s), 569 (s), 553 (s)

HRMS (APPI,  $\text{CH}_2\text{Cl}_2$ , positive mode) calcd. for  $\text{C}_{22}\text{H}_{12}\text{N}_3\text{OS}$   $[\text{M}+\text{H}]^+$  366.0696, found 366.0702

## UV/Vis Spectroscopic Measurements

### Determination of the UV/Vis Spectra of Pure *Z* and *E* Isomers

UV/Vis absorption spectra of pure *E/Z* isomer were obtained by subtraction of a *E/Z* mix absorption spectrum with known isomeric composition from a second different *E/Z* mix spectrum with known isomeric composition. Determination of the isomeric compositions of the *E/Z* isomer mixtures was based on the integration of indicative signals in the  $^1\text{H}$ -NMR spectra recorded immediately after measurement of the *E/Z* mix absorption spectra.

Stock solutions of diaryl-HTIs **2**, **3**, **4**, **7**, **8**, and **9** were prepared from 1.44 mg – 2.06 mg substance and 0.8 mL – 2.5 mL toluene- $d_8$  or DMSO- $d_6$ . The NMR-tube was filled with 0.8 mL of the stock solution and the UV/Vis cuvette (1 cm) was filled with 2.5 mL toluene or DMSO (spectroscopic grade) mixed with 14.9  $\mu\text{L}$  – 60.4  $\mu\text{L}$  stock solution. The  $^1\text{H}$ -NMR spectrum and the UV/Vis spectrum were recorded simultaneously. After the first measurement, the NMR sample was irradiated with 435 nm, 450 nm, or 470 nm to change the isomeric composition. For the second measurement 14.9  $\mu\text{L}$  – 60.4  $\mu\text{L}$  of the irradiated NMR solution was mixed with 2.5 mL of spectroscopic solvent in the UV/Vis cuvette. Again, the  $^1\text{H}$ -NMR spectrum and the UV/Vis spectrum were recorded simultaneously.

Furthermore, the following conditions must be fulfilled:

- The photosystem must consist of only two isomers and the interconversion of the *E/Z* isomers under irradiation with light must proceed without formation of side-products
- The total concentration in the UV/Vis cuvette remains constant throughout the measurement to obtain defined isosbestic points
- The *E/Z* mix spectra result from the addition of the pure *E* and *Z* spectra

Absorption spectra of pure *E* and *Z* isomer are defined as:

$$S(E) = S(X_E; Y_E) \quad (\text{eq. 1})$$

$$S(Z) = S(X_Z; Y_Z) \quad (\text{eq. 2})$$

with the absorption intensity  $Y_E$  and  $Y_Z$  at wavelengths  $X_E$  and  $X_Z$ , respectively. The *E/Z* mix absorption spectra with one isomer enriched (*E*<sup>+</sup> or *Z*<sup>+</sup>) are described as addition of pure *E* and *Z* spectra with different weighting factors for each isomer:

$$S_{mix}(E+) = S(E) \cdot z_1 + S(Z) \cdot z_2 \quad (\text{eq. 3})$$

$$S_{mix}(Z+) = S(E) \cdot z_3 + S(Z) \cdot z_4 \quad (\text{eq. 4})$$

with  $z_1$ ,  $z_2$ ,  $z_3$  and  $z_4$  as weighting factors accounting for the relative concentration of each isomer in the enriched mixtures derived from integration of characteristic signals of the *E* or *Z* isomer in the corresponding  $^1\text{H-NMR}$  spectra.

|                                           | <i>E</i> isomer | <i>Z</i> isomer |
|-------------------------------------------|-----------------|-----------------|
| <i>E</i> enriched spectrum<br>( $S(E+)$ ) | $z_1$           | $z_2$           |
| <i>Z</i> enriched spectrum<br>( $S(Z+)$ ) | $z_3$           | $z_4$           |

$S(E)$  and  $S(Z)$  can be expressed as

$$S(E) = \frac{S_{mix}(E+) \cdot z_4 - S_{mix}(Z+) \cdot z_2}{z_1 \cdot z_4 - z_3 \cdot z_2} \quad (\text{eq. 5})$$

$$S(Z) = \frac{S_{mix}(Z+) \cdot z_1 - S_{mix}(E+) \cdot z_3}{z_1 \cdot z_4 - z_2 \cdot z_3} \quad (\text{eq. 6})$$

by solving linear equations eq. 3 and eq. 4.

With the calculated absorptions of the pure *E* and *Z* isomer and known concentration in the cuvette in hand the molar extinction coefficients can be calculated according to the *Lambert-Beer* Law:

$$A = \varepsilon \cdot c \cdot d \quad (\text{eq. 7})$$

with the absorption  $A$ , the concentration  $c$ , path length of the cuvette  $d$  and the molar extinction coefficient  $\varepsilon$ .

## Molar Extinction Coefficients of Diaryl-HTIs

UV/Vis absorption spectra of diaryl-HTIs **1**, **5**, **6**, and **10** were recorded in toluene and DMSO (spectroscopic grade). Therefore, stock solutions with defined concentrations ( $3.45 \cdot 10^{-5} - 1.30 \cdot 10^{-4} \text{ mol} \cdot \text{L}^{-1}$ ) were prepared. The UV/Vis cuvette was filled with 2.5 mL of stock solution. Molar extinction coefficients were calculated according to the *Lambert-Beer* law (eq. 7).

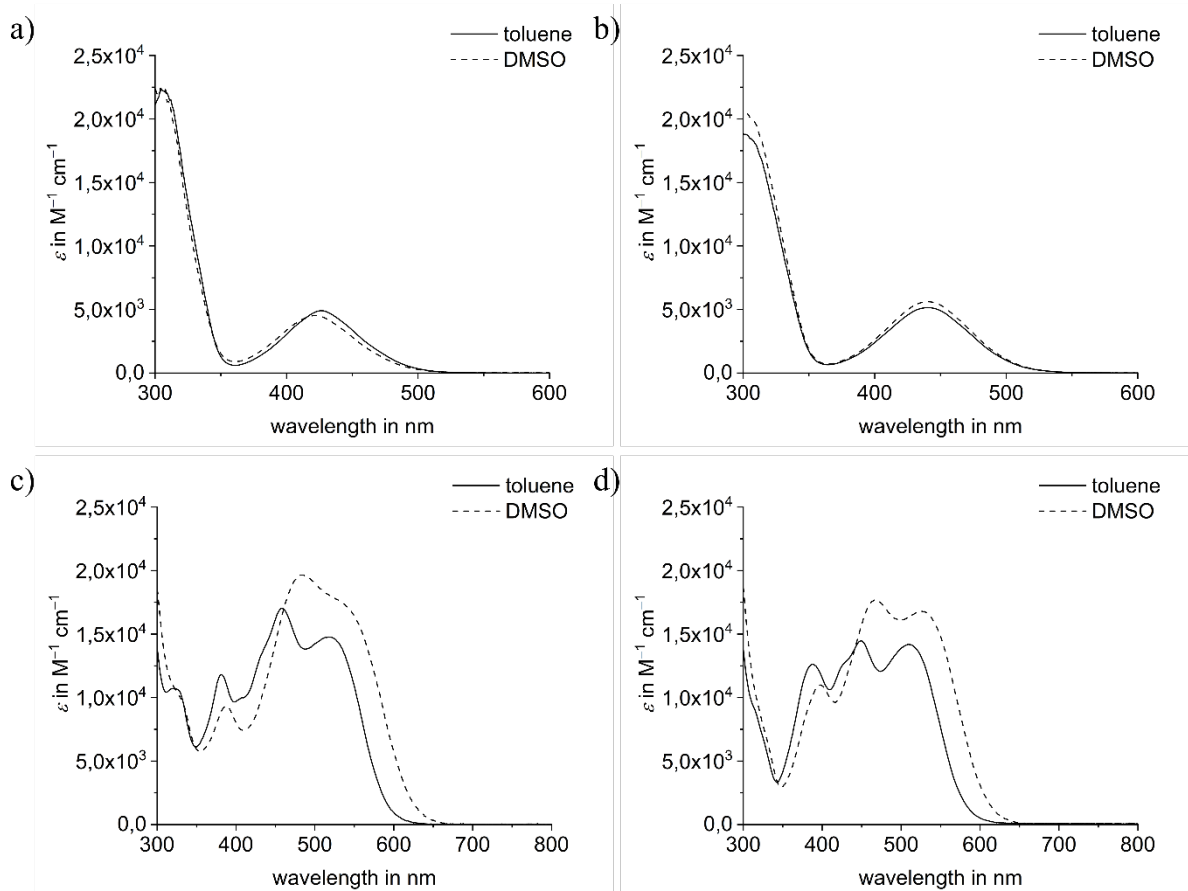

**Figure S1:** Molar extinction coefficients of diaryl-HTIs **1**, **5**, **6** and **10** in toluene and DMSO; a) molar extinction coefficients of **10** in toluene (solid line) and DMSO (dotted line); b) molar extinction coefficients of **5** in toluene (solid line) and DMSO (dotted line); c) molar extinction coefficients of **6** in toluene (solid line) and DMSO (dotted line); d) molar extinction coefficients of **1** in toluene (solid line) and DMSO (dotted line).

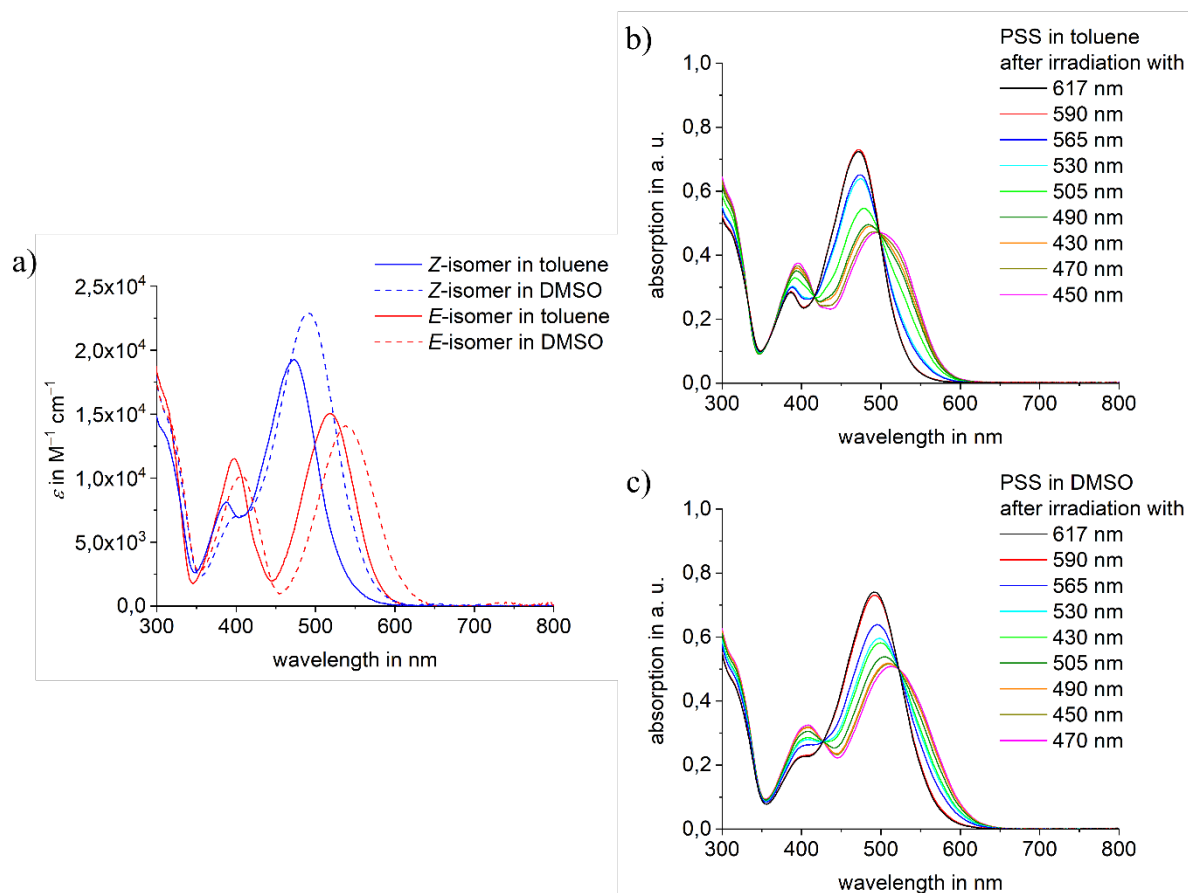

**Figure S2:** Molar extinction coefficients and irradiation behavior of diaryl-HTI **2** in toluene and DMSO; a) molar extinction coefficients of pure *E* (red) and *Z* isomer (blue) in toluene (solid line) and DMSO (dashed line); b) UV/Vis absorption spectra of enriched *E* or *Z* isomer measured in toluene at 23 °C after irradiation with 617 nm, 590 nm, 565 nm, 530 nm, 505 nm, 490 nm, 470 nm, 450 nm and 430 nm light; c) UV/Vis absorption spectra of enriched *E* or *Z* isomer measured in DMSO at 23 °C after irradiation with 617 nm, 590 nm, 565 nm, 530 nm, 505 nm, 490 nm, 470 nm, 450 nm and 430 nm light.

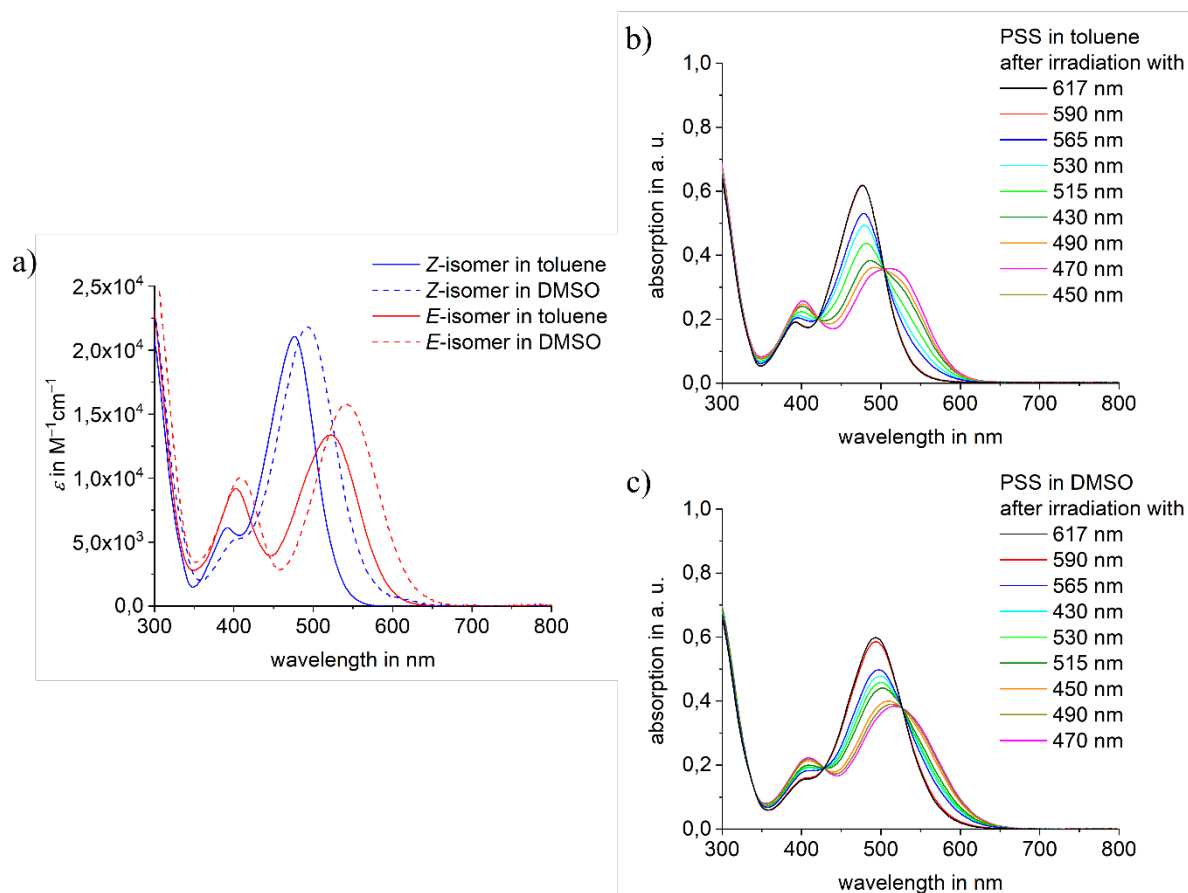

**Figure S3:** Molar extinction coefficients and irradiation behavior of diaryl-HTI **3** in toluene and DMSO; a) molar extinction coefficients of pure *E* (red) and *Z* isomer (blue) in toluene (solid line) and DMSO (dashed line); b) UV/Vis absorption spectra of enriched *E* or *Z* isomer measured in toluene at 23 °C after irradiation with 617 nm, 590 nm, 565 nm, 530 nm, 515 nm, 490 nm, 470 nm, 450 nm and 430 nm light; c) UV/Vis absorption spectra of enriched *E* or *Z* isomer measured in DMSO at 23 °C after irradiation with 617 nm, 590 nm, 565 nm, 530 nm, 515 nm, 490 nm, 470 nm, 450 nm and 430 nm light.

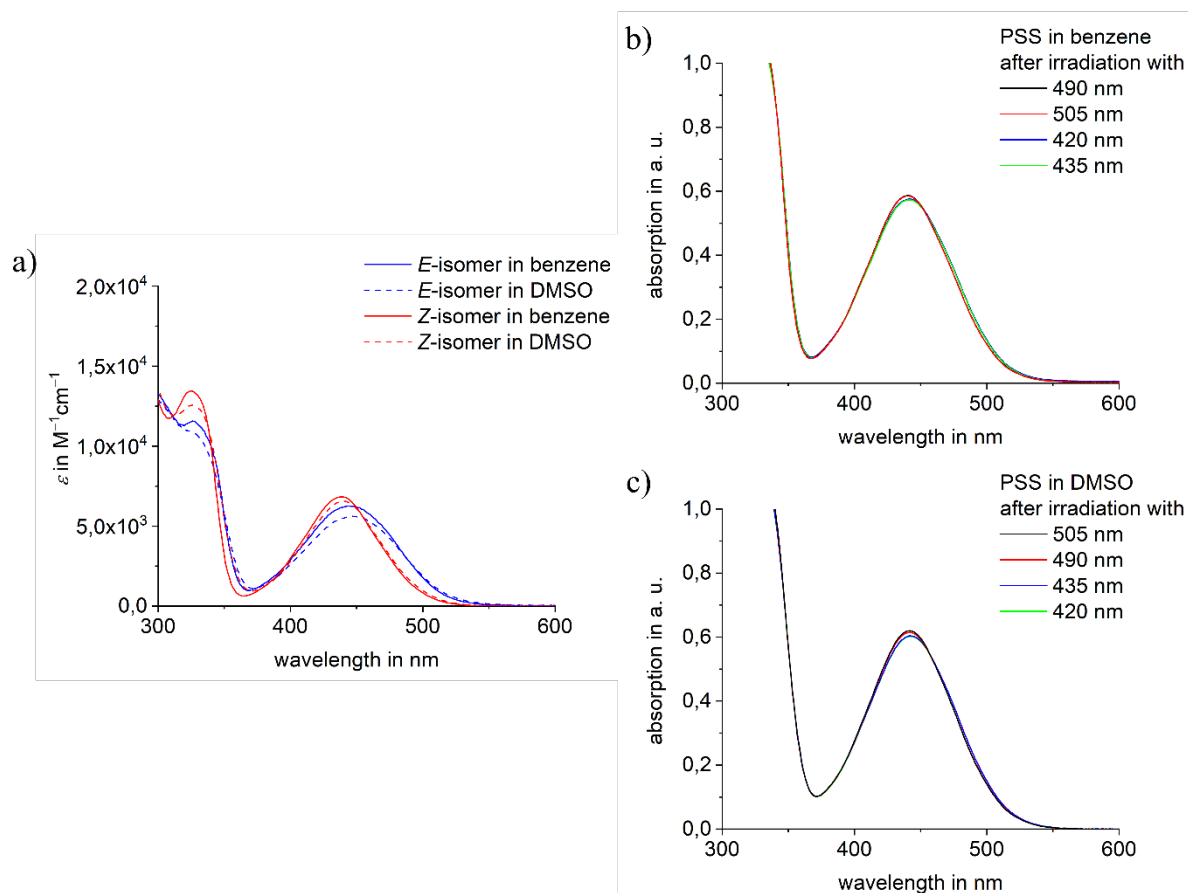

**Figure S4:** Molar extinction coefficients and irradiation behavior of diaryl-HTI 4 in benzene and DMSO; a) molar extinction coefficients of pure *E* and *Z* isomer in toluene (solid line) and DMSO (dashed line); b) UV/Vis absorption spectra of enriched *E* or *Z* isomer measured in toluene at 23 °C after irradiation with 505 nm, 490 nm, 435 nm and 420 nm light; c) UV/Vis absorption spectra of enriched *E* or *Z* isomer measured in DMSO at 23 °C after irradiation with 505 nm, 490 nm, 435 nm and 420 nm light.

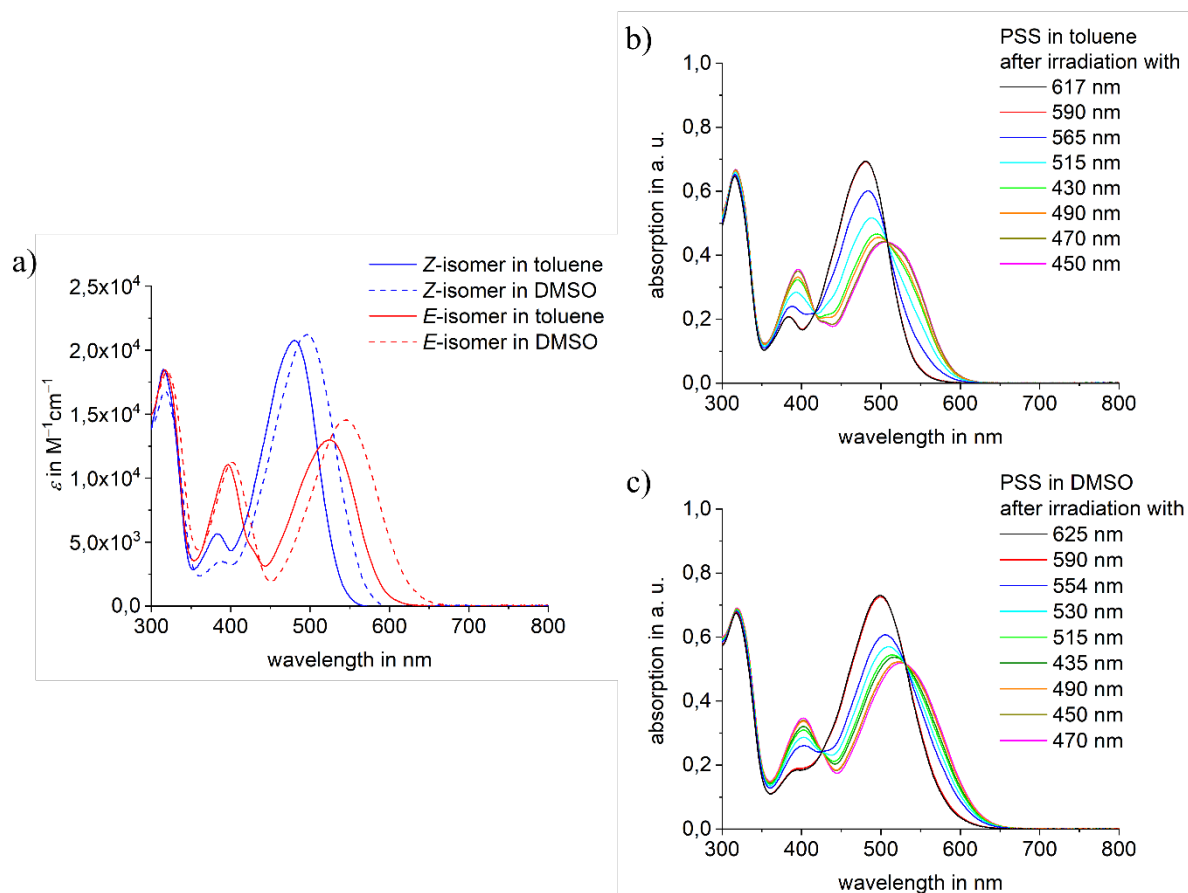

**Figure S5:** Molar extinction coefficients and irradiation behavior of diaryl-HTI **7** in toluene and DMSO; a) molar extinction coefficients of pure *E* (red) and *Z* isomer (blue) in toluene (solid line) and DMSO (dashed line); b) UV/Vis absorption spectra of enriched *E* or *Z* isomer measured in toluene at 23 °C after irradiation with 617 nm, 590 nm, 565 nm, 515 nm, 490 nm, 470 nm, 450 nm and 430 nm light; c) UV/Vis absorption spectra of enriched *E* or *Z* isomer measured in DMSO at 23 °C after irradiation with 625 nm, 590 nm, 554 nm, 530 nm, 515 nm, 490 nm, 470 nm, 450 nm and 435 nm light.

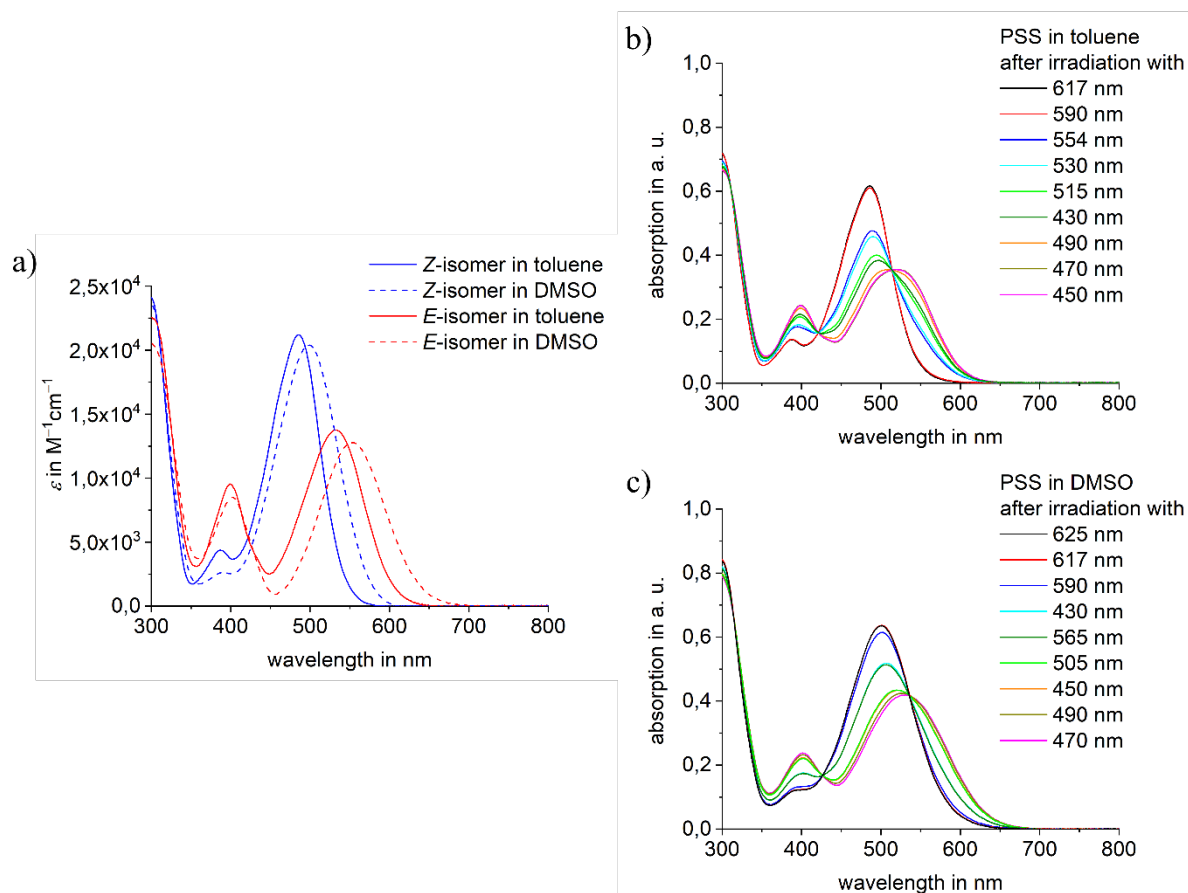

**Figure S6:** Molar extinction coefficients and irradiation behavior of diaryl-HTI **8** in toluene and DMSO; a) molar extinction coefficients of pure *E* (red) and *Z* isomer (blue) in toluene (solid line) and DMSO (dashed line); b) UV/Vis absorption spectra of enriched *E* or *Z* isomer measured in toluene at 23 °C after irradiation with 617 nm, 590 nm, 554 nm, 530 nm, 515 nm, 490 nm, 470 nm, 450 nm and 430 nm light; c) UV/Vis absorption spectra of enriched *E* or *Z* isomer measured in DMSO at 23 °C after irradiation with 625 nm, 617 nm, 590 nm, 565 nm, 505 nm, 490 nm, 470 nm, 450 nm and 430 nm light.

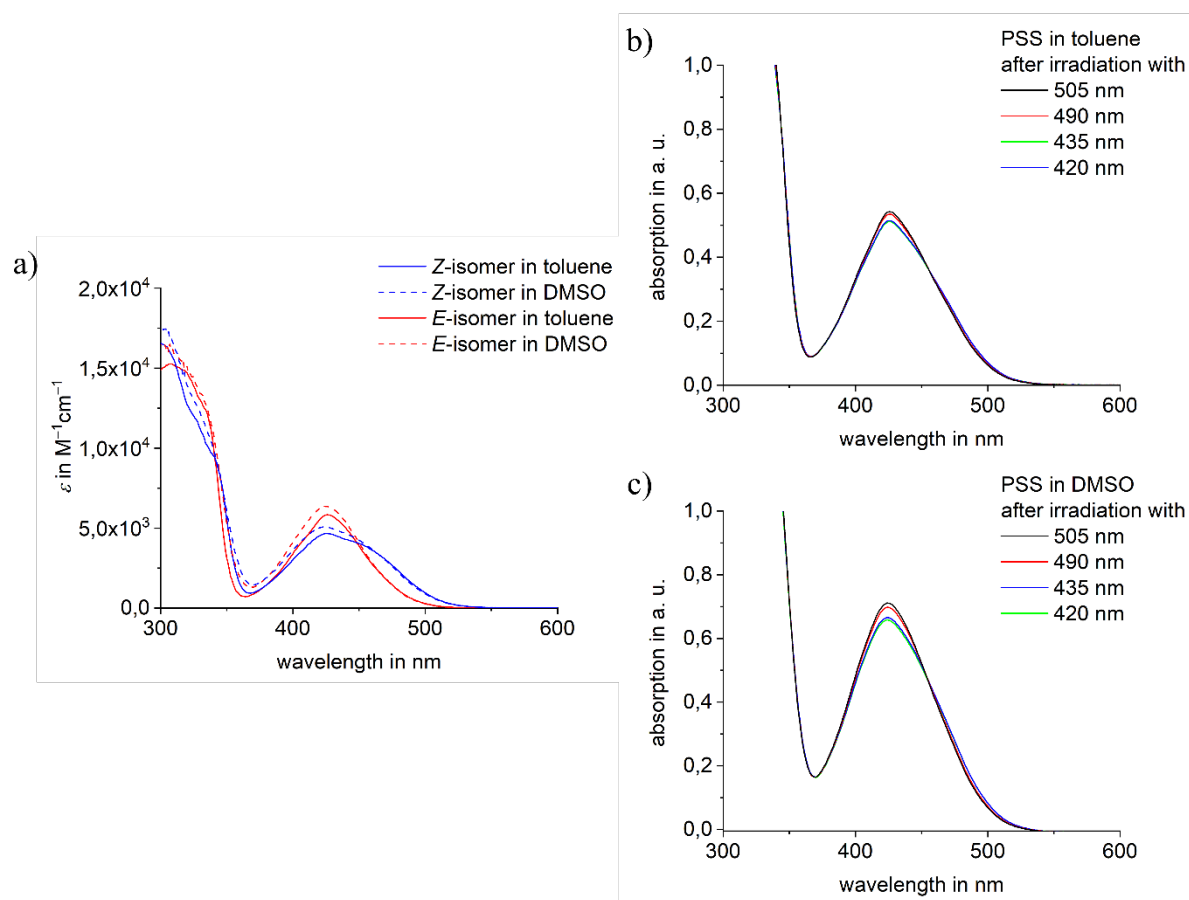

**Figure S7:** Molar extinction coefficients and irradiation behavior of diaryl-HTI **9** in toluene and DMSO; a) molar extinction coefficients of pure *E* (red) and *Z* isomer (blue) in toluene (solid line) and DMSO (dashed line); b) UV/Vis absorption spectra of enriched *E* or *Z* isomer measured in toluene at 23 °C after irradiation with 505 nm, 490 nm, 435 nm and 420 nm light; c) UV/Vis absorption spectra of enriched *E* or *Z* isomer measured in DMSO at 23 °C after irradiation with 505 nm, 490 nm, 435 nm and 420 nm light.

## NMR Irradiation experiments

The *E/Z* isomeric ratio obtained after light irradiation was determined by  $^1\text{H}$  NMR spectroscopy. NMR tubes were charged with 0.27 – 2.6 mg substance and 0.7 mL of toluene- $d_8$ , DMSO- $d_6$  or benzene- $d_6$ . The NMR samples were irradiated with various wavelengths in defined time intervals and  $^1\text{H}$ -NMR spectra were recorded afterwards until no change of the *E/Z* isomeric ratio was observed. Suitable signals for the *E* and *Z* isomer in the  $^1\text{H}$ -NMR spectrum were integrated and the integral of one signal was set to 1. The *E/Z* isomeric ratio was then calculated according to

$$\frac{I_1}{I_2} = \frac{1}{1+i} \quad (\text{eq. 8})$$

with  $I_1$  and  $I_2$  as isomer 1 and isomer 2 abundance and  $i$  as the second integral, which was not set to 1.

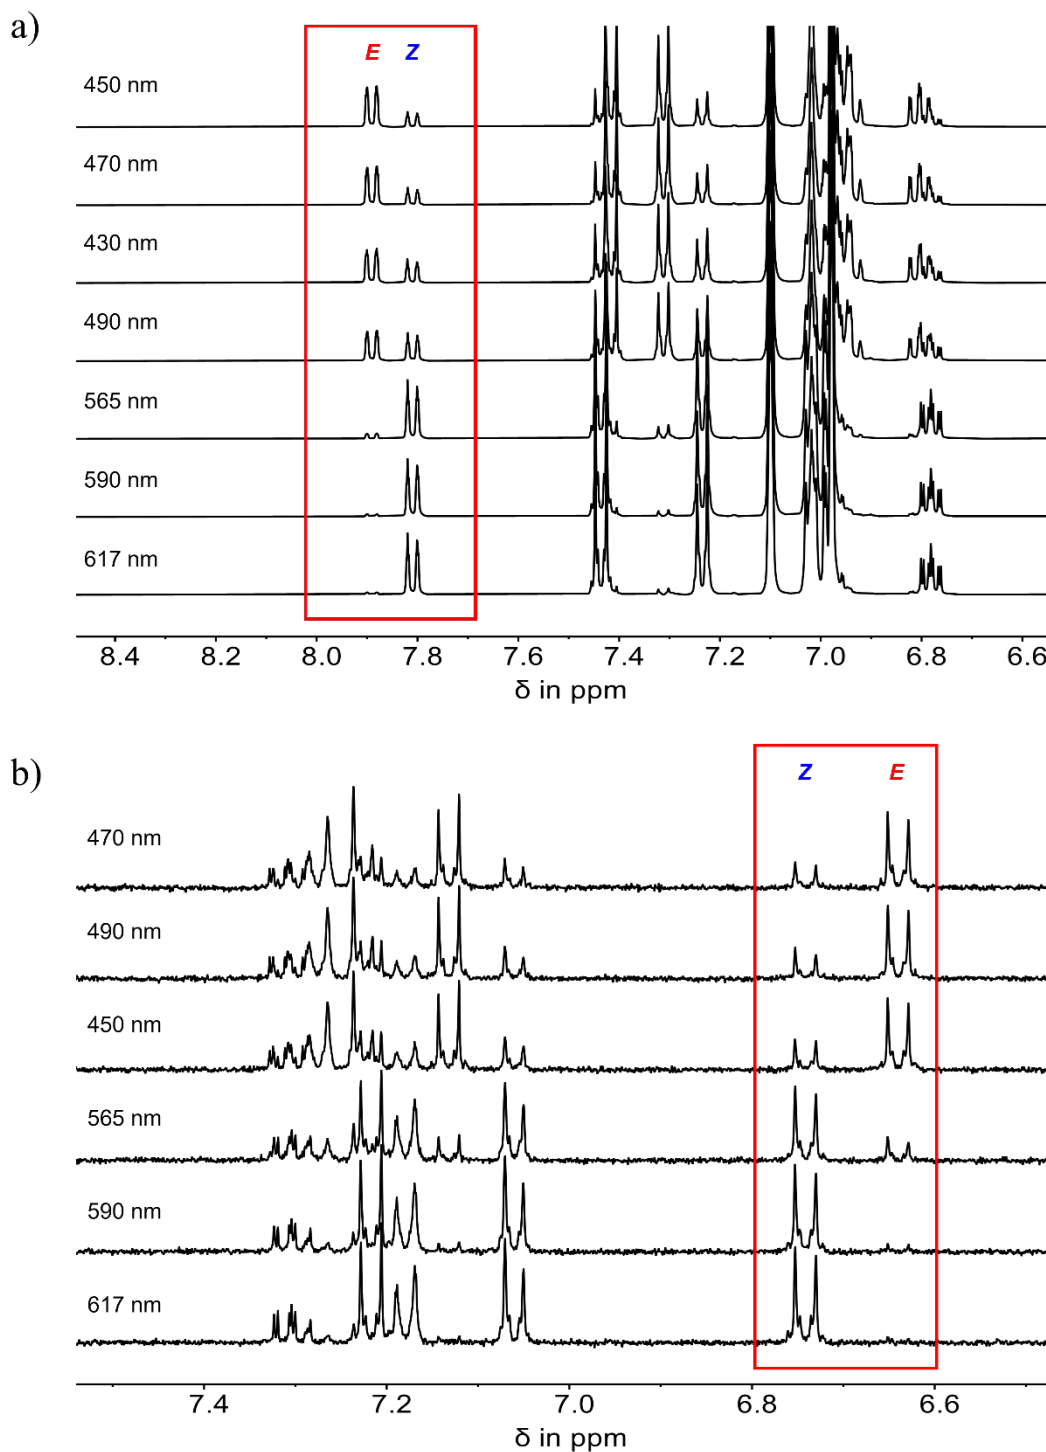

**Figure S8:** Partial  $^1\text{H}$ -NMR spectra of diaryl-HTI **2** recorded after irradiation with light of different wavelengths to enrich the *E* or *Z* isomer; a) partial  $^1\text{H}$ -NMR spectra (400 MHz, toluene- $d_8$ , 20  $^\circ\text{C}$ ) of enriched *E* and *Z* isomer after irradiation to the pss with 430 nm, 450 nm, 470 nm, 490 nm, 565 nm, 590 nm, or 617 nm light; b) partial  $^1\text{H}$ -NMR spectra (400 MHz, DMSO- $d_6$ , 20  $^\circ\text{C}$ ) of enriched *E* and *Z* isomer after irradiation to the pss with 450 nm, 470 nm, 490 nm, 565 nm, 590 nm, or 617 nm light.

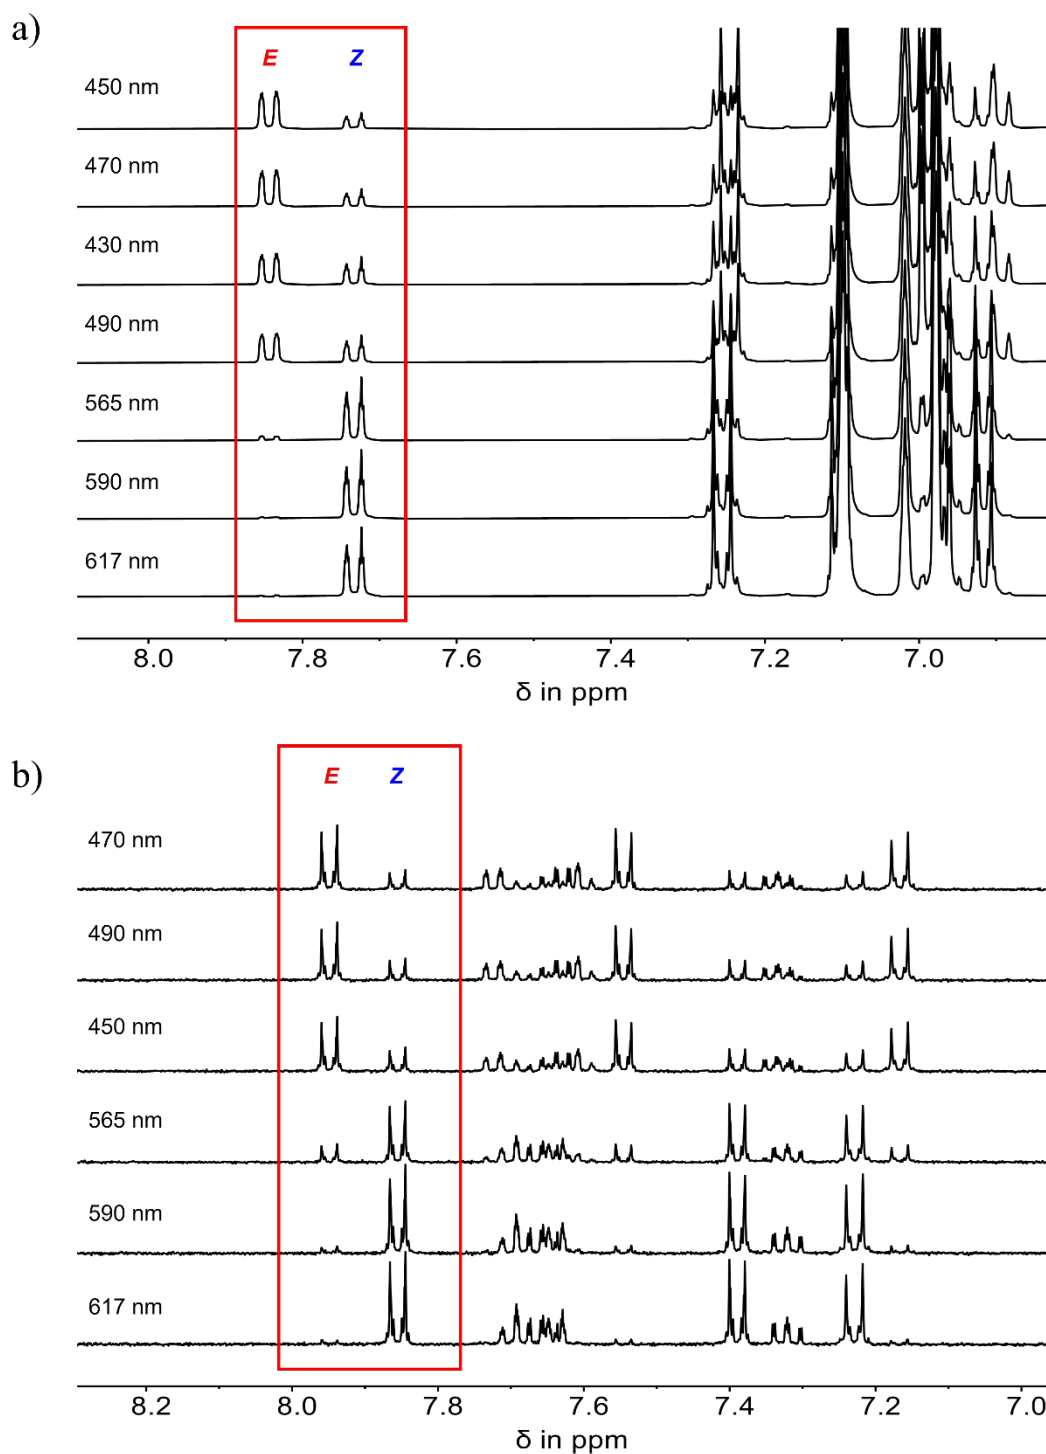

**Figure S9:** Partial  $^1\text{H}$ -NMR spectra of diaryl-HTI **3** recorded after irradiation with light of different wavelengths to enrich the *E* or *Z* isomer; a) partial  $^1\text{H}$ -NMR spectra (400 MHz, toluene- $d_8$ , 20 °C) of enriched *E* and *Z* isomer after irradiation to the pss with 430 nm, 450 nm, 470 nm, 490 nm, 565 nm, 590 nm, or 617 nm light; b) partial  $^1\text{H}$ -NMR spectra (400 MHz, DMSO- $d_6$ , 20 °C) of enriched *E* and *Z* isomer after irradiation with 450 nm, 470 nm, 490 nm, 565 nm, 590 nm, or 617 nm light.

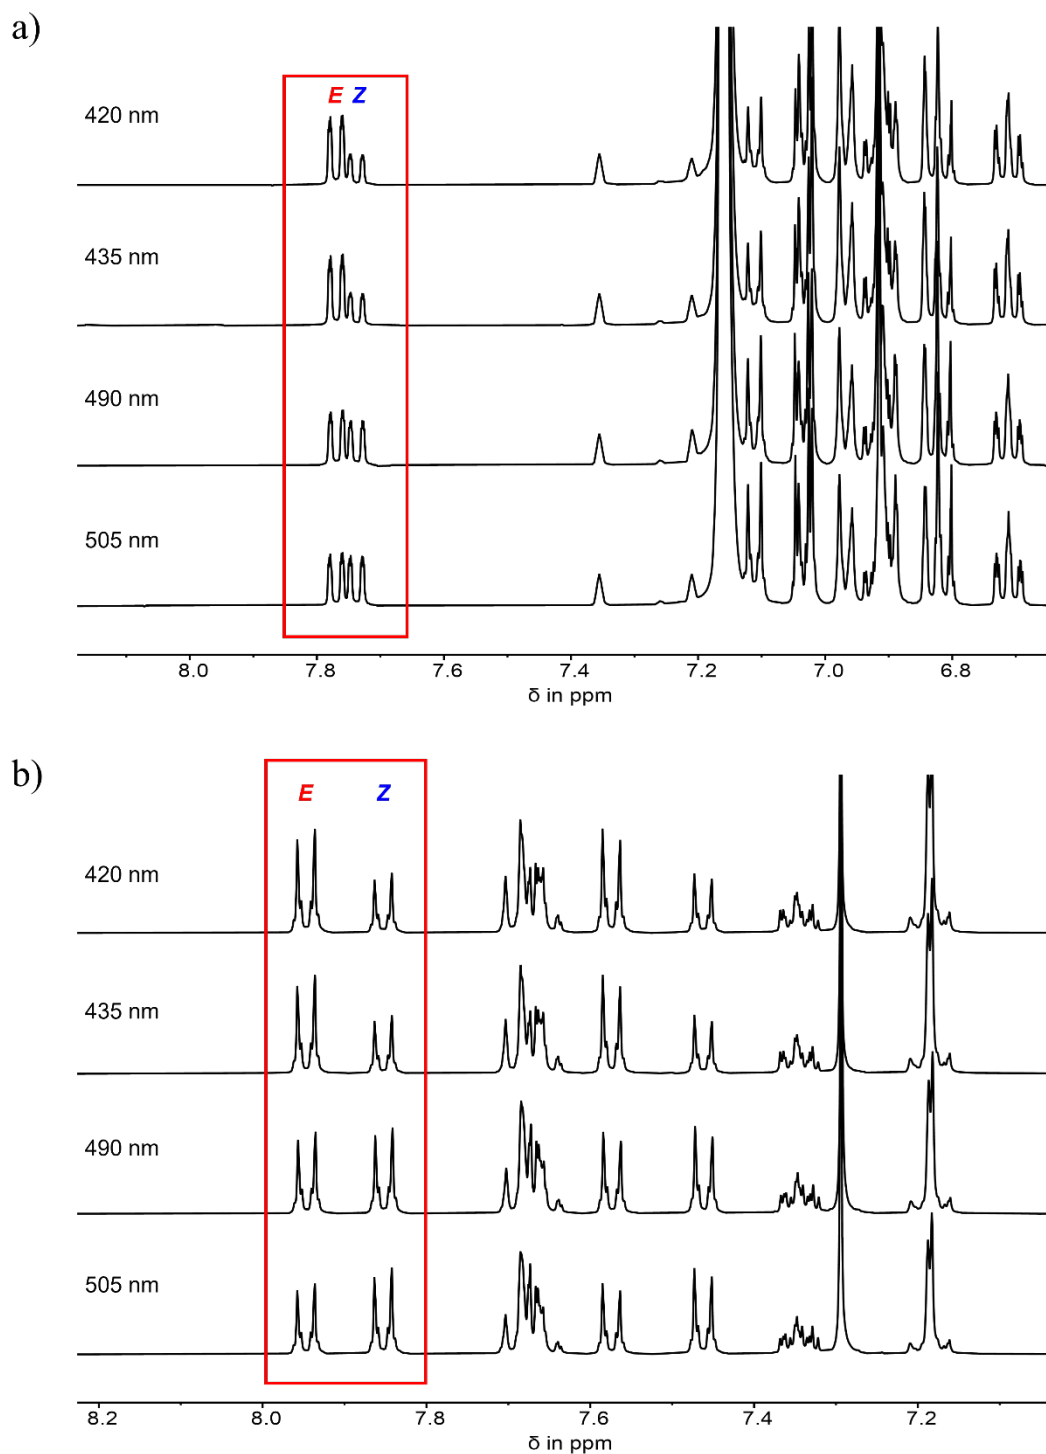

**Figure S10:** Partial  $^1\text{H}$ -NMR spectra of diacyl-HTI **4** recorded after irradiation with light of different wavelengths to enrich the *E* or *Z* isomer; a) partial  $^1\text{H}$ -NMR spectra (400 MHz, benzene- $d_6$ , 20 °C) of enriched *E* and *Z* isomer after irradiation to the pss with 420 nm, 435 nm, 490 nm, or 505 nm light; b) partial  $^1\text{H}$ -NMR spectra (400 MHz, DMSO- $d_6$ , 20 °C) of enriched *E* and *Z* isomer after irradiation to the pss with 420 nm, 435 nm, 490 nm, or 505 nm light.

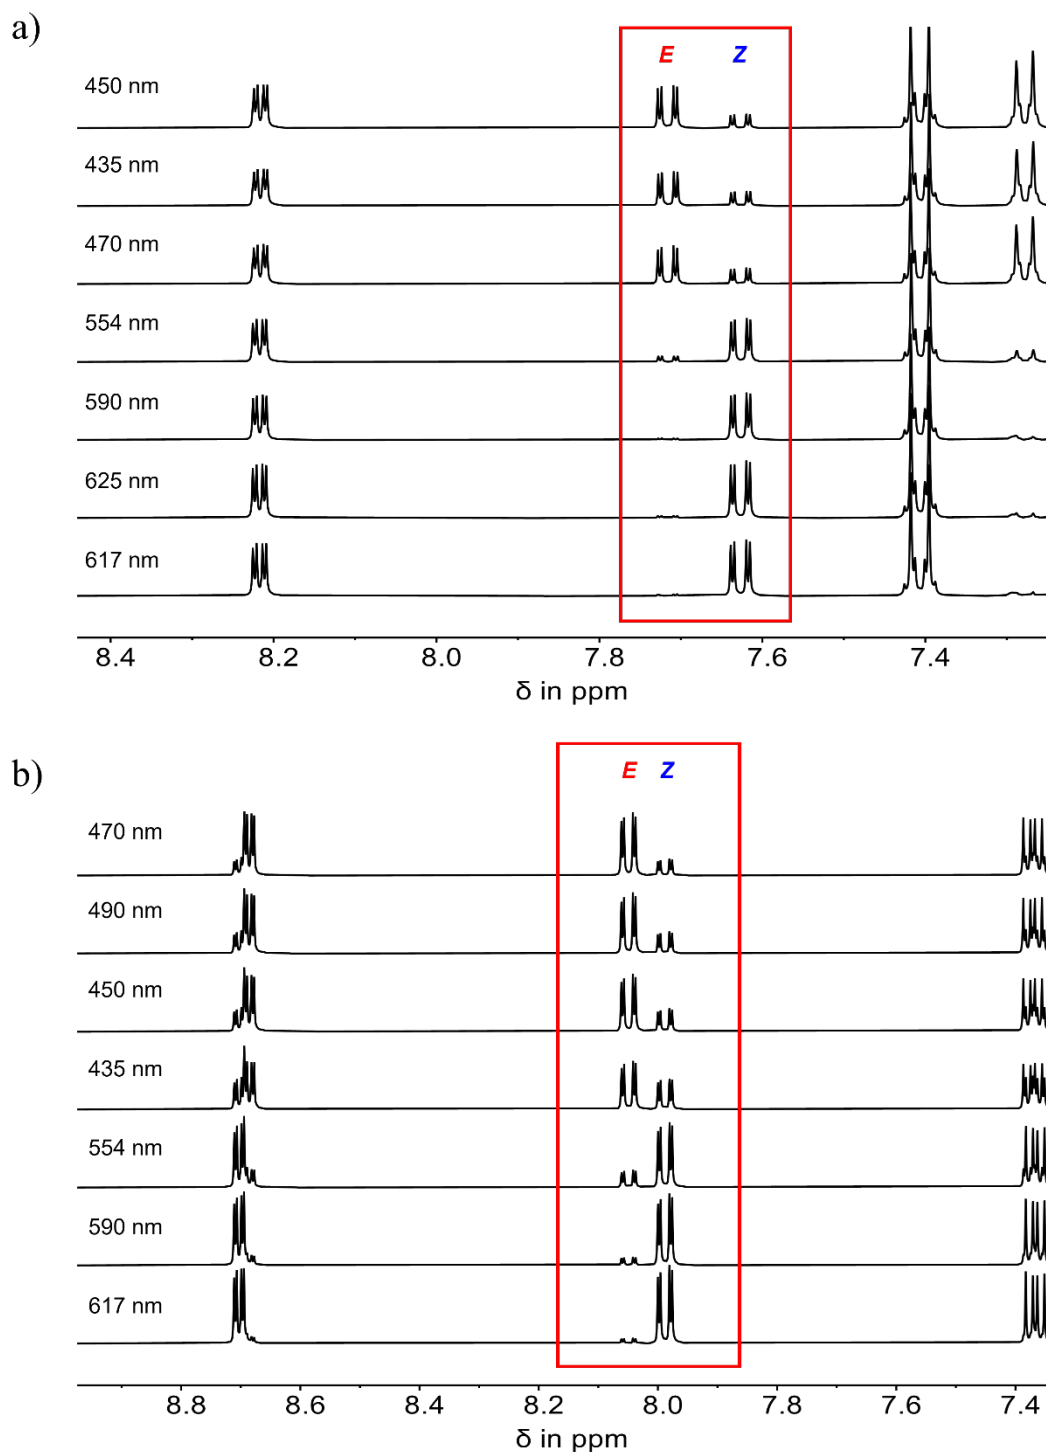

**Figure S11:** Partial  $^1\text{H}$ -NMR spectra of diaryl-HTI **7** recorded after irradiation with light of different wavelengths to enrich the *E* or *Z* isomer; a) partial  $^1\text{H}$ -NMR spectra (400 MHz, toluene- $d_8$ , 20  $^\circ\text{C}$ ) of enriched *E* and *Z* isomer after irradiation to the pss with 435 nm, 450 nm, 470 nm, 554 nm, 590 nm, 617 nm, or 625 nm light; b) partial  $^1\text{H}$ -NMR spectra (400 MHz, DMSO- $d_6$ , 20  $^\circ\text{C}$ ) of enriched *E* and *Z* isomer after irradiation to the pss with 435 nm, 450 nm, 470 nm, 490 nm, 554 nm, 590 nm, or 617 nm light.

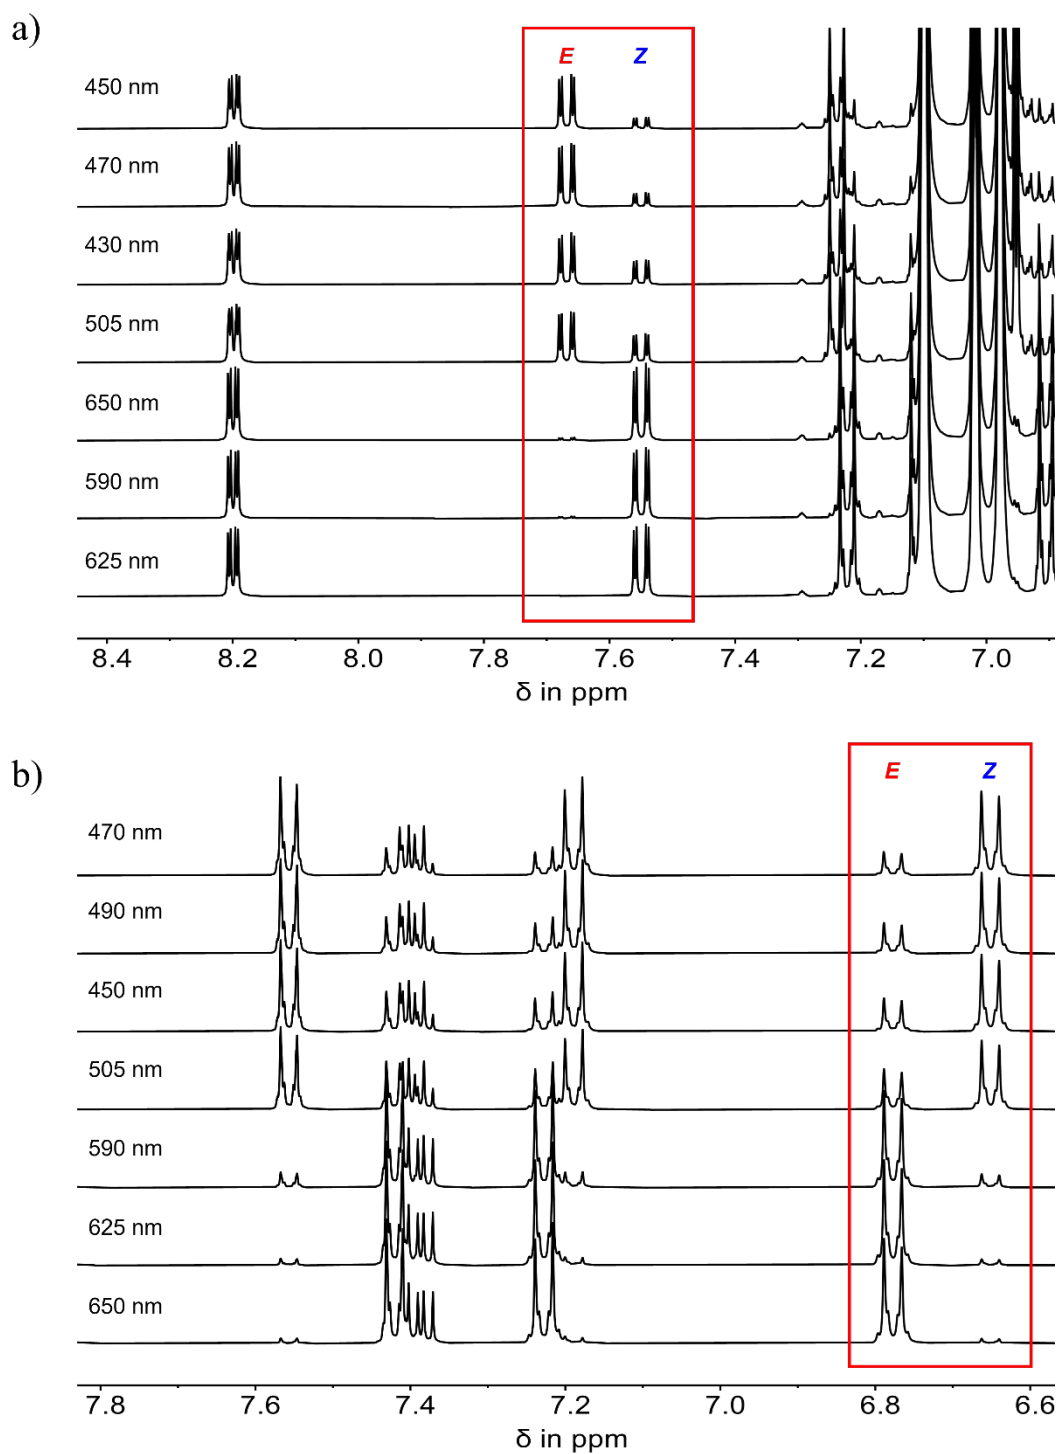

**Figure S12:** Partial  $^1\text{H}$ -NMR spectra of diaryl-HTI **8** recorded after irradiation with light of different wavelengths to enrich the *E* or *Z* isomer; a) Partial  $^1\text{H}$ -NMR spectra (400 MHz, toluene- $d_8$ , 20  $^\circ\text{C}$ ) of enriched *E* and *Z* isomer after irradiation to the pss with 430 nm, 450 nm, 470 nm, 505 nm, 590 nm, 625 nm, or 650 nm light; b) Partial  $^1\text{H}$ -NMR spectra (400 MHz, DMSO- $d_6$ , 20  $^\circ\text{C}$ ) of enriched *E* and *Z* isomer after irradiation to the pss with 450 nm, 470 nm, 490 nm, 505 nm, 590 nm, 625 nm, or 650 nm light.

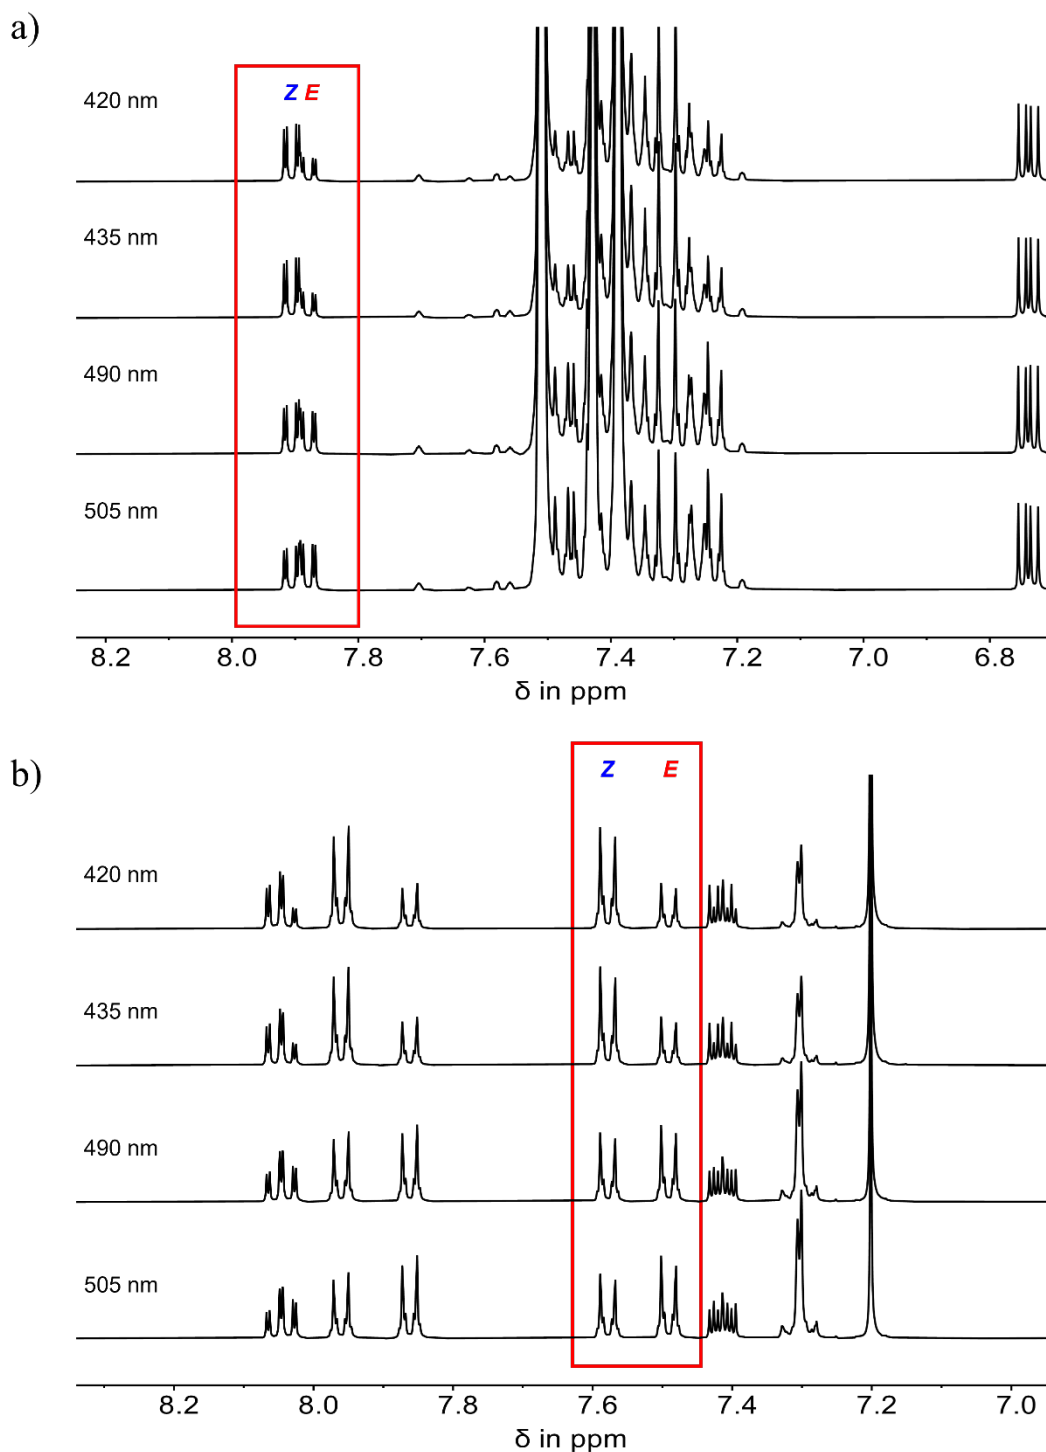

**Figure S13:** Partial  $^1\text{H}$ -NMR spectra of diaryl-HTI **9** recorded after irradiation with light of different wavelengths to enrich the *E* or *Z* isomer; a) partial  $^1\text{H}$ -NMR spectra (400 MHz, toluene- $d_8$ , 20 °C) of enriched *E* and *Z* isomer after irradiation to the pss with 420 nm, 435 nm, 490 nm, or 505 nm light; b) partial  $^1\text{H}$ -NMR spectra (400 MHz, DMSO- $d_6$ , 20 °C) of enriched *E* and *Z* isomer after irradiation to the pss with 420 nm, 435 nm, 490 nm, and 505 nm light.

**Table S1:** Isomeric composition obtained from integration of specific signals in the  $^1\text{H}$  NMR spectra after irradiation to the pss of the NMR samples with different wavelengths of light in different solvents.

| Hemithioindigo | Solvent        | Wavelength | % <i>Z</i> -isomer | % <i>E</i> -isomer |
|----------------|----------------|------------|--------------------|--------------------|
| <b>2</b>       | toluene- $d_8$ | 430 nm     | 35                 | 65                 |
|                |                | 450 nm     | 24                 | 76                 |
|                |                | 470 nm     | 28                 | 72                 |
|                |                | 490 nm     | 44                 | 56                 |
|                |                | 565 nm     | 90                 | 10                 |
|                |                | 590 nm     | 95                 | 5                  |
|                |                | 617 nm     | 96                 | 4                  |
|                | DMSO- $d_6$    | 450 nm     | 27                 | 73                 |
|                |                | 470 nm     | 25                 | 75                 |
|                |                | 490 nm     | 30                 | 70                 |
|                |                | 565 nm     | 78                 | 22                 |
|                |                | 590 nm     | 93                 | 7                  |
|                |                | 617 nm     | 97                 | 3                  |
| <b>3</b>       | toluene- $d_8$ | 430 nm     | 40                 | 60                 |
|                |                | 450 nm     | 25                 | 75                 |
|                |                | 470 nm     | 26                 | 74                 |
|                |                | 490 nm     | 42                 | 58                 |
|                |                | 565 nm     | 90                 | 10                 |
|                |                | 590 nm     | 97                 | 3                  |
|                |                | 617 nm     | 97                 | 3                  |
|                | DMSO- $d_6$    | 450 nm     | 30                 | 70                 |
|                |                | 470 nm     | 23                 | 77                 |
|                |                | 490 nm     | 27                 | 73                 |
|                |                | 565 nm     | 77                 | 23                 |
|                |                | 590 nm     | 93                 | 7                  |
|                |                | 617 nm     | 96                 | 4                  |
| <b>4</b>       | benzene- $d_6$ | 420 nm     | 31                 | 69                 |
|                |                | 435 nm     | 31                 | 69                 |
|                |                | 490 nm     | 45                 | 55                 |
|                |                | 505 nm     | 49                 | 51                 |

|   |                |        |    |    |
|---|----------------|--------|----|----|
| 7 | DMSO- $d_6$    | 420 nm | 36 | 64 |
|   |                | 435 nm | 37 | 63 |
|   |                | 490 nm | 51 | 49 |
|   |                | 505 nm | 55 | 45 |
|   | toluene- $d_8$ | 435 nm | 30 | 70 |
|   |                | 450 nm | 25 | 75 |
|   |                | 470 nm | 30 | 70 |
|   |                | 554 nm | 87 | 13 |
|   |                | 590 nm | 96 | 4  |
|   |                | 617 nm | 97 | 3  |
|   |                | 625 nm | 96 | 4  |
|   | DMSO- $d_6$    | 435 nm | 39 | 61 |
|   |                | 450 nm | 29 | 71 |
|   |                | 470 nm | 21 | 79 |
|   |                | 490 nm | 26 | 74 |
|   |                | 554 nm | 78 | 22 |
|   |                | 590 nm | 90 | 10 |
|   |                | 617 nm | 94 | 6  |
|   |                | 650 nm | 84 | 16 |
| 8 | toluene- $d_8$ | 430 nm | 33 | 67 |
|   |                | 450 nm | 17 | 83 |
|   |                | 470 nm | 18 | 82 |
|   |                | 505 nm | 35 | 65 |
|   |                | 590 nm | 97 | 3  |
|   |                | 625 nm | 98 | 2  |
|   |                | 650 nm | 96 | 4  |
|   | DMSO- $d_6$    | 450 nm | 30 | 70 |
|   |                | 470 nm | 22 | 78 |
|   |                | 490 nm | 27 | 73 |
|   |                | 505 nm | 37 | 63 |
|   |                | 590 nm | 88 | 12 |
|   |                | 625 nm | 94 | 6  |
|   |                | 650 nm | 96 | 4  |
|   |                | 650 nm | 96 | 4  |
| 9 | toluene- $d_8$ | 420 nm | 71 | 29 |
|   |                | 420 nm | 71 | 29 |

|                             |        |    |    |
|-----------------------------|--------|----|----|
|                             | 435 nm | 71 | 29 |
|                             | 490 nm | 55 | 45 |
|                             | 505 nm | 51 | 49 |
| DMSO- <i>d</i> <sub>6</sub> | 420 nm | 69 | 31 |
|                             | 435 nm | 68 | 32 |
|                             | 490 nm | 48 | 52 |
|                             | 505 nm | 44 | 46 |

---

## Thermal Double Bond Isomerization

Thermal double bond isomerization of diaryl-HTIs **2**, **3**, **4**, **7**, **8**, and **9** was investigated by heating experiments in the dark. First NMR-tubes were charged with 0.19 to 2.30 mg of the particular diaryl-HTI and 0.7 mL of toluene- $d_8$  or DMSO- $d_6$ . For enrichment of the metastable isomers in solution, the NMR-samples were irradiated with 435 nm, 450 nm, or 470 nm. Afterwards, the NMR-tubes were heated (30 to 100 °C) in the dark and the kinetics of thermal isomerizations were followed by  $^1\text{H}$ -NMR spectra measured in defined time intervals. Concentrations of *E* and *Z* isomer were determined by integration of indicative  $^1\text{H}$ -NMR signals. The measurements were stopped after reaching the thermal equilibrium between the *E* and *Z* isomer.

Equation 9 describes the thermal double bond isomerization process of a unimolecular first order reaction towards an equilibrium between the two isomers isomer 1 and isomer 2:

$$\ln \left( \frac{[I_1]_{t_0} - [I_1]_{eq}}{[I_1]_t - [I_1]_{eq}} \right) = (k_{I_1/I_2} + k_{I_2/I_1})t \quad (\text{eq. 9})$$

with  $[I_1]_{t_0}$  as the initial concentration of isomer 1 at time  $t = 0$ ,  $[I_1]_{eq}$  as the concentration of isomer 1 in the equilibrium,  $[I_1]_t$  as the concentration of isomer 1 at a defined time  $t$ ,  $k_{I_1/I_2}$  as the rate constant for the isomerization of isomer 1 to isomer 2,  $k_{I_2/I_1}$  as the rate constant for the isomerization of isomer 2 to isomer 1 and  $t$  as the elapsed time. The slope  $m = k_{I_1/I_2} + k_{I_2/I_1}$  obtained from the plot of the logarithmic part in equation 9 against time  $t$  contains the rate constants for both isomerization processes. Consequently, the rate constant can be calculated according to:

$$k_{I_1/I_2} = \frac{m}{1 + \frac{[I_1]_{eq}}{[I_2]_{eq}}} \quad (\text{eq. 10})$$

when the law of mass action (eq. 11) is considered:

$$\frac{[I_1]_{eq}}{[I_2]_{eq}} = \frac{k_{I_2/I_1}}{k_{I_1/I_2}} \quad (\text{eq. 11})$$

The Gibbs energy of activation  $\Delta G^\ddagger$  can then be calculated from the rate constants by using the *Eyring* equation (eq. 12):

$$k = \frac{k_B \cdot T}{h} \cdot e^{\frac{-\Delta G^\ddagger}{R \cdot T}} \quad (\text{eq. 12})$$

with the *Boltzmann* constant  $k_B$  ( $1.381 \cdot 10^{-23} \text{ J} \cdot \text{K}^{-1}$ ), temperature  $T$ , *Planck* constant  $h$  ( $6.626 \cdot 10^{-34} \text{ J} \cdot \text{s}$ ) and the rate constant  $k$ . After rearrangement of equation 12 the Gibbs energy of activation  $\Delta G^\ddagger$  is obtained:

$$\Delta G^\ddagger = -R \cdot T \cdot \ln \left( \frac{k \cdot h}{k_B \cdot T} \right) \quad (\text{eq. 13})$$

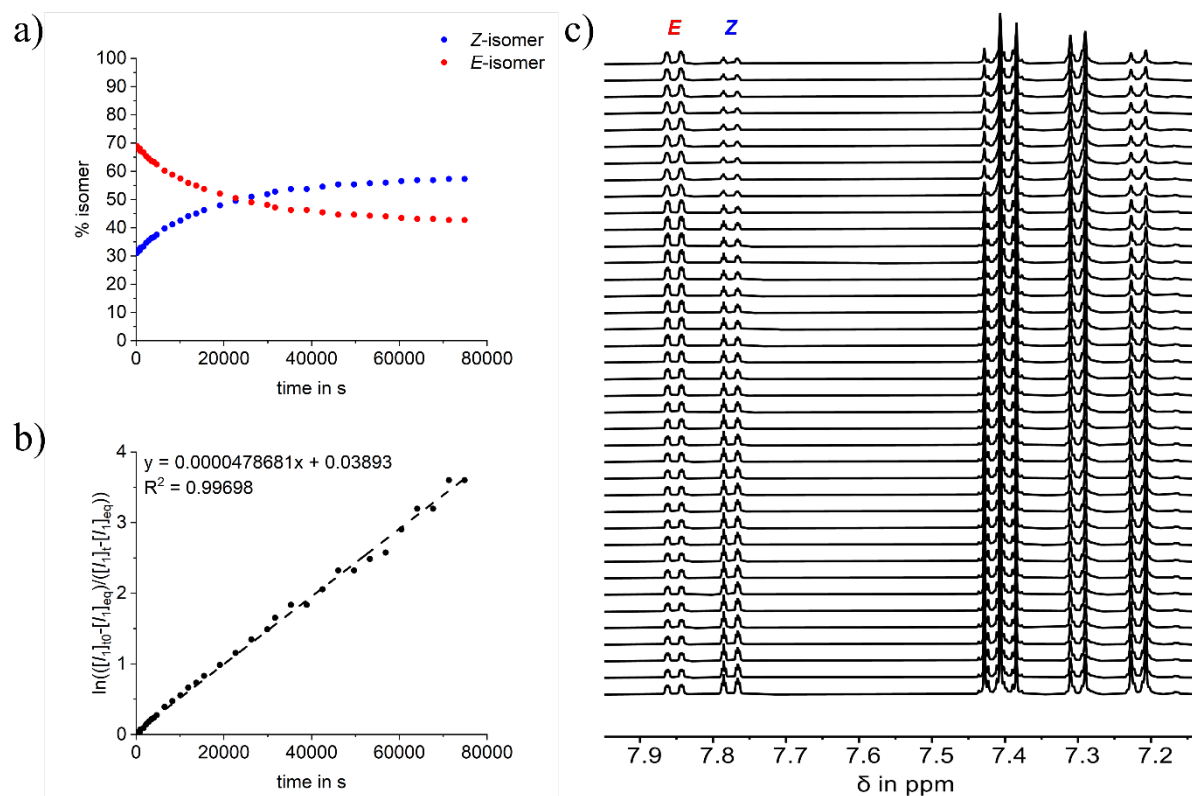

**Figure S14:** Thermal *E* to *Z* isomerization of diaryl-HTI **2** at 50 °C in toluene-*d*<sub>8</sub> solution in the dark. The metastable *E*-isomer was enriched with 470 nm light irradiation before the measurement; a) temporal change of the isomeric composition while heating at 50 °C; b) first order kinetic analysis of the thermal *E* to *Z* isomerization by plotting equation 9. The rate constant  $k_{E/Z}$  is obtained from the slope of the linear fit; c) partial <sup>1</sup>H NMR spectra (400 MHz, toluene-*d*<sub>8</sub>, 50 °C) measured in defined time intervals while heating the NMR-sample at 50 °C.

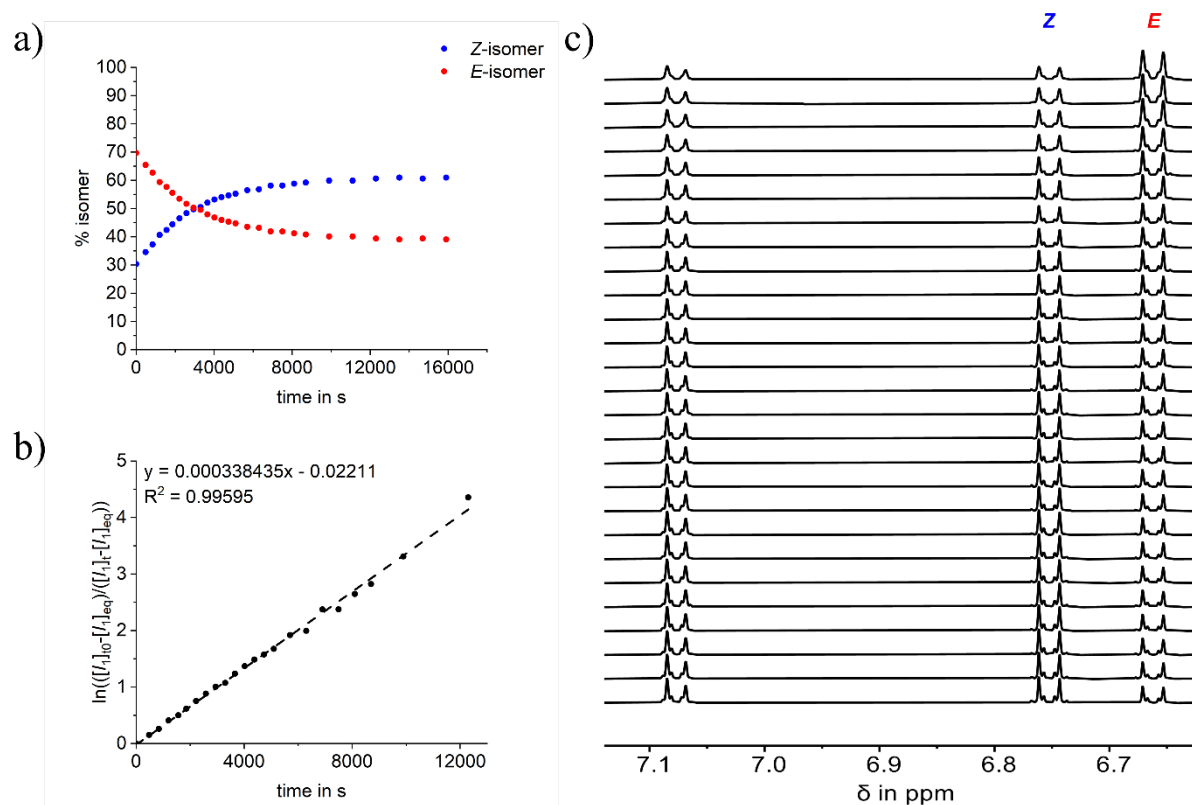

**Figure S15:** Thermal *E* to *Z* isomerization of diaryl-HTI **2** at 100 °C in DMSO-*d*<sub>6</sub> solution in the dark. The metastable *E*-isomer was enriched with 470 nm light irradiation before the measurement; a) temporal change of the isomeric composition while heating at 100 °C; b) first order kinetic analysis of the thermal *E* to *Z* isomerization by plotting equation 9. The rate constant  $k_{E/Z}$  is obtained from the slope of the linear fit; c) partial <sup>1</sup>H NMR spectra (500 MHz, DMSO-*d*<sub>6</sub>, 100 °C) measured in defined time intervals while heating the NMR-sample at 100 °C.

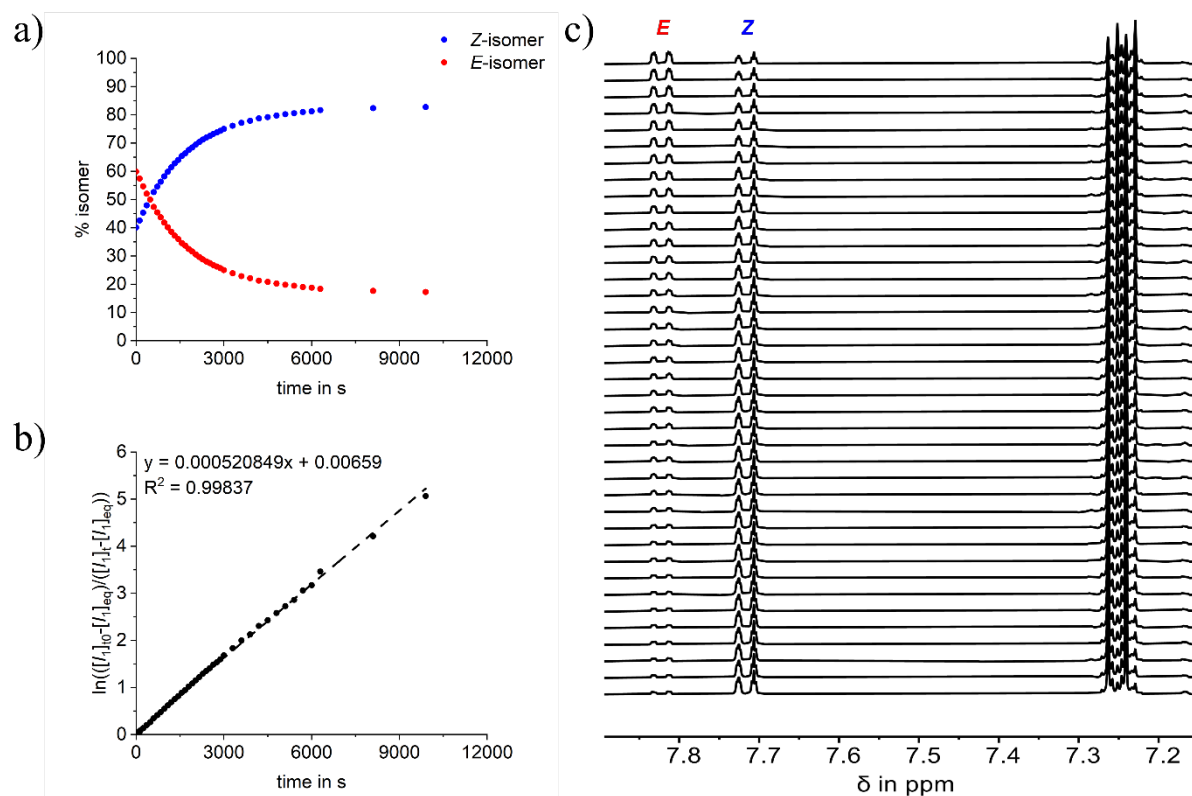

**Figure S16:** Thermal *E* to *Z* isomerization of diaryl-HTI **3** at 40 °C in toluene-*d*<sub>8</sub> solution in the dark. The metastable *E*-isomer was enriched with 470 nm light irradiation before the measurement; a) temporal change of the isomeric composition while heating at 40 °C; b) first order kinetic analysis of the thermal *E* to *Z* isomerization by plotting equation 9. The rate constant  $k_{E/Z}$  is obtained from the slope of the linear fit; c) partial <sup>1</sup>H NMR spectra (400 MHz, toluene-*d*<sub>8</sub>, 40 °C) measured in defined time intervals while heating the NMR-sample at 40 °C.

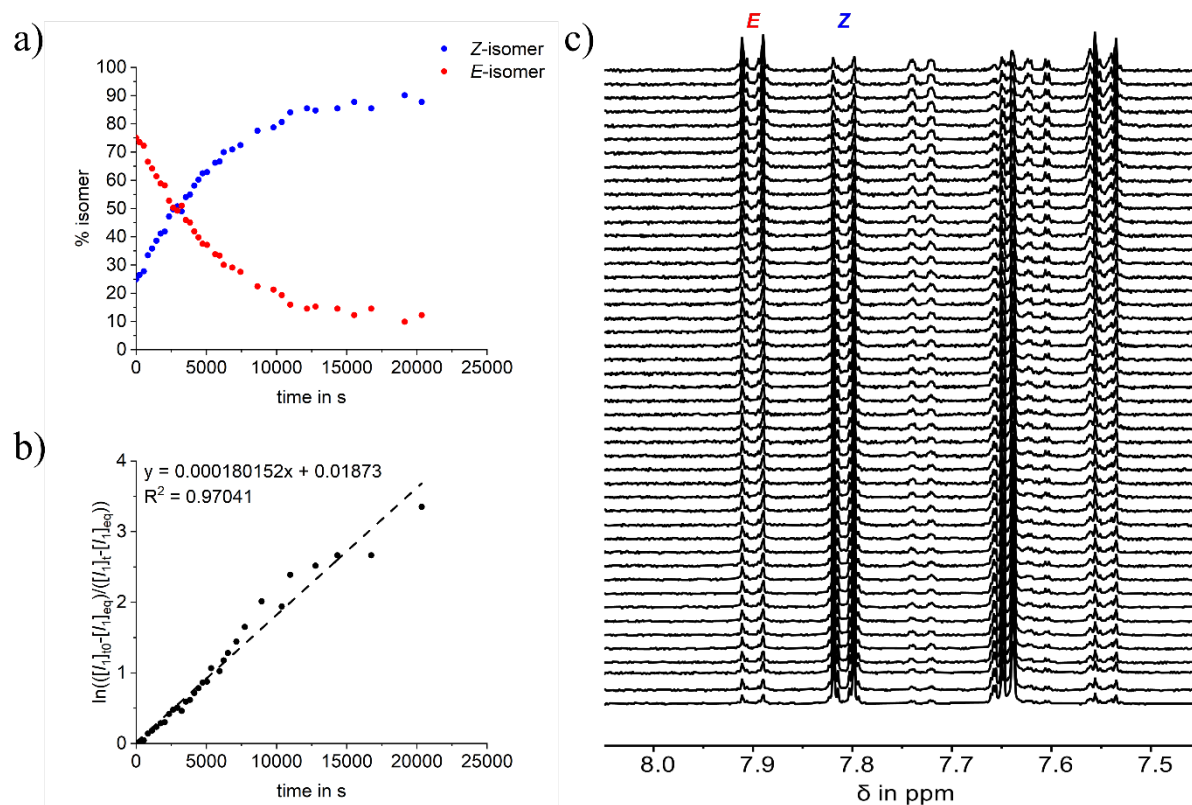

**Figure S17:** Thermal *E* to *Z* isomerization of diaryl-HTI **3** at 90 °C in DMSO-*d*<sub>6</sub> solution in the dark. The metastable *E*-isomer was enriched with 470 nm light irradiation before the measurement; a) temporal change of the isomeric composition while heating at 90 °C; b) first order kinetic analysis of the thermal *E* to *Z* isomerization by plotting equation 9. The rate constant  $k_{E/Z}$  is obtained from the slope of the linear fit; c) partial <sup>1</sup>H NMR spectra (400 MHz, DMSO-*d*<sub>6</sub>, 90 °C) measured in defined time intervals while heating the NMR-sample at 90 °C.

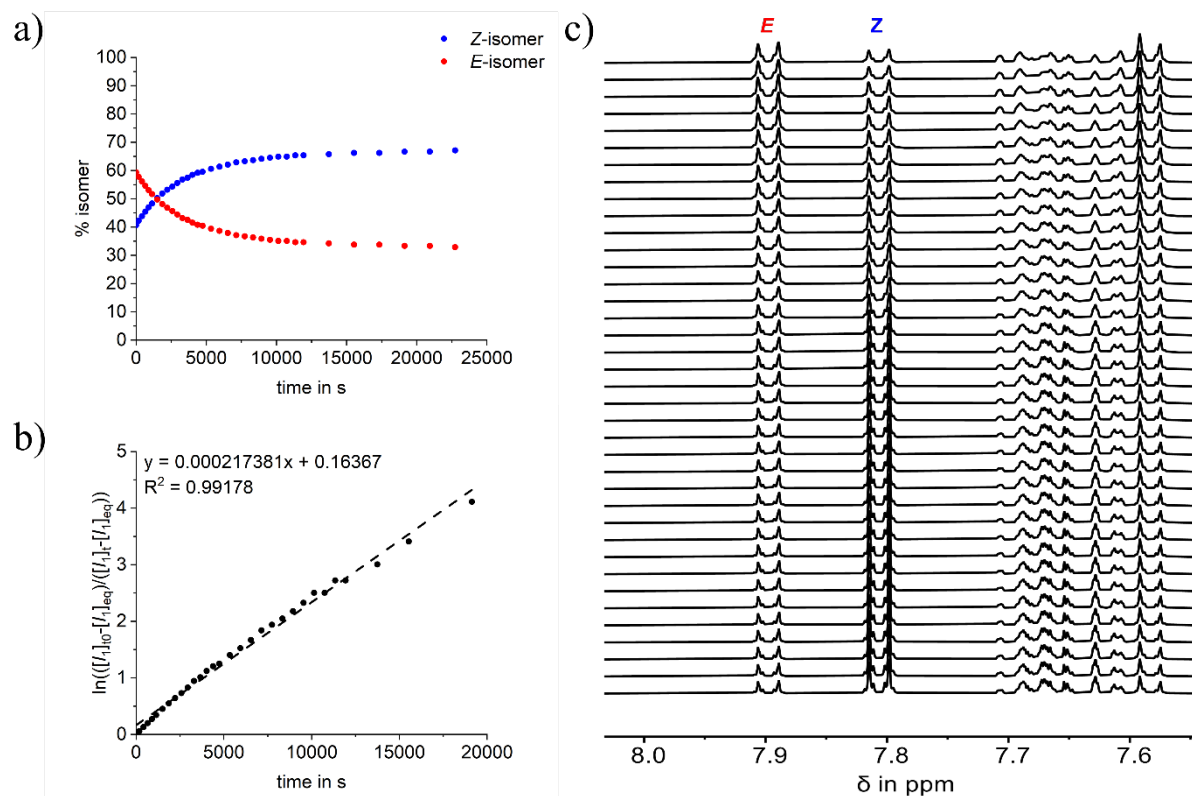

**Figure S18:** Thermal *E* to *Z* isomerization of diaryl-HTI **4** at 90 °C in DMSO-*d*<sub>6</sub> solution in the dark. The metastable *E*-isomer was enriched with 420 nm light irradiation before the measurement; a) temporal change of the isomeric composition while heating at 90 °C; b) first order kinetic analysis of the thermal double bond isomerization by plotting equation 9. The rate constant  $k_{E/Z}$  is obtained from the slope of the linear fit; c) partial <sup>1</sup>H NMR spectra (500 MHz, DMSO-*d*<sub>6</sub>, 90 °C) measured in defined time intervals while heating the NMR-sample at 90 °C.

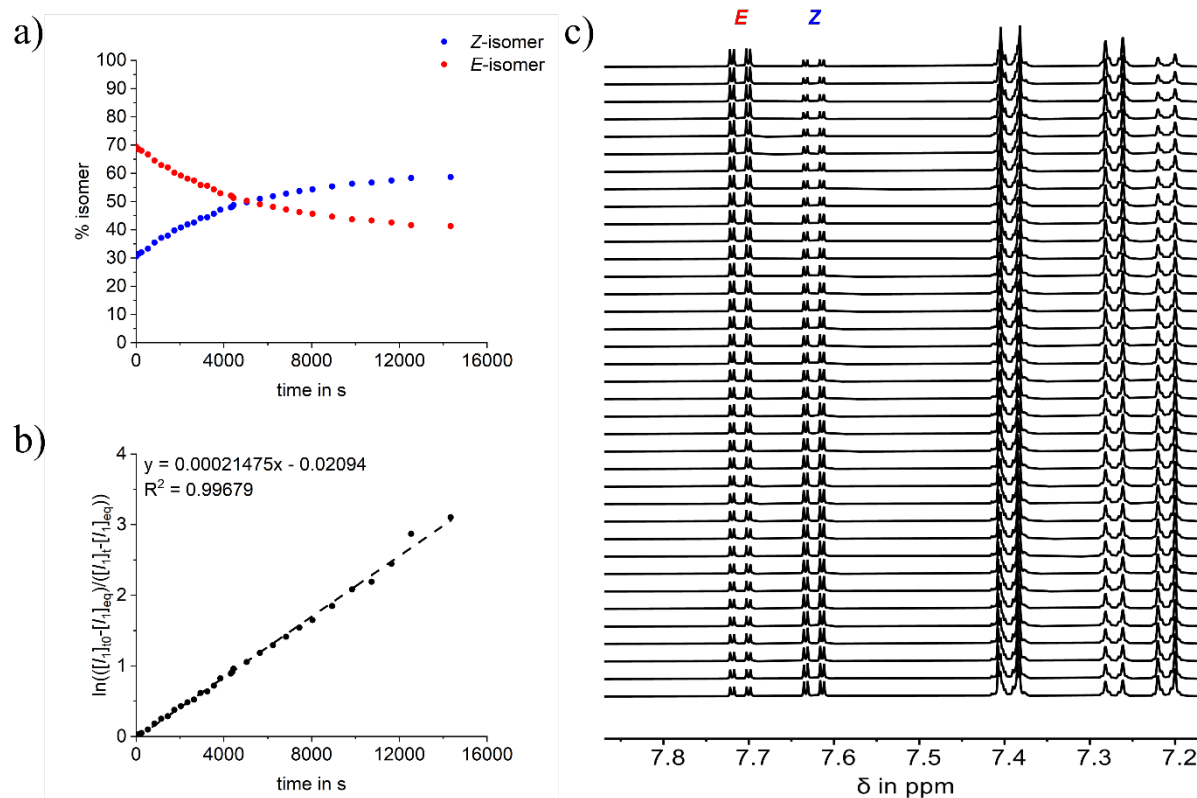

**Figure S19:** Thermal *E* to *Z* isomerization of diaryl-HTI 7 at 40 °C in toluene- $d_8$  solution in the dark. The metastable *E*-isomer was enriched with 470 nm light irradiation before the measurement; a) temporal change of the isomeric composition while heating at 40 °C; b) first order kinetic analysis of the thermal *E* to *Z* isomerization by plotting equation 9. The rate constant  $k_{E/Z}$  is obtained from the slope of the linear fit; c) partial  $^1\text{H}$  NMR spectra (400 MHz, toluene- $d_8$ , 40 °C) measured in defined time intervals while heating the NMR-sample at 40 °C.

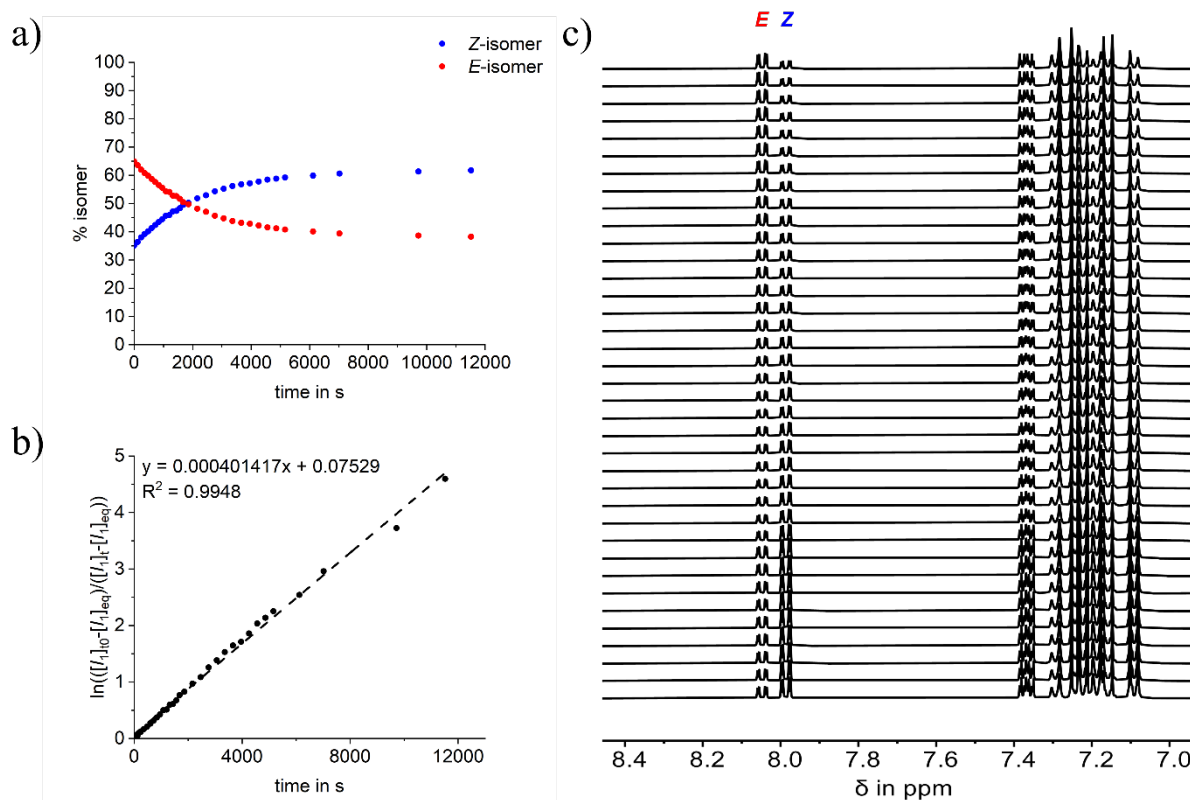

**Figure S20:** Thermal *E* to *Z* isomerization of diaryl-HTI 7 at 30 °C in DMSO- $d_6$  solution in the dark. The metastable *E*-isomer was enriched with 470 nm light irradiation before the measurement; a) temporal change of the isomeric composition while heating at 30 °C; b) first order kinetic analysis of the thermal *E* to *Z* isomerization by plotting equation 9. The rate constant  $k_{E/Z}$  is obtained from the slope of the linear fit; c) partial  $^1\text{H}$  NMR spectra (400 MHz, DMSO- $d_6$ , 30 °C) measured in defined time intervals while heating the NMR-sample at 30 °C.

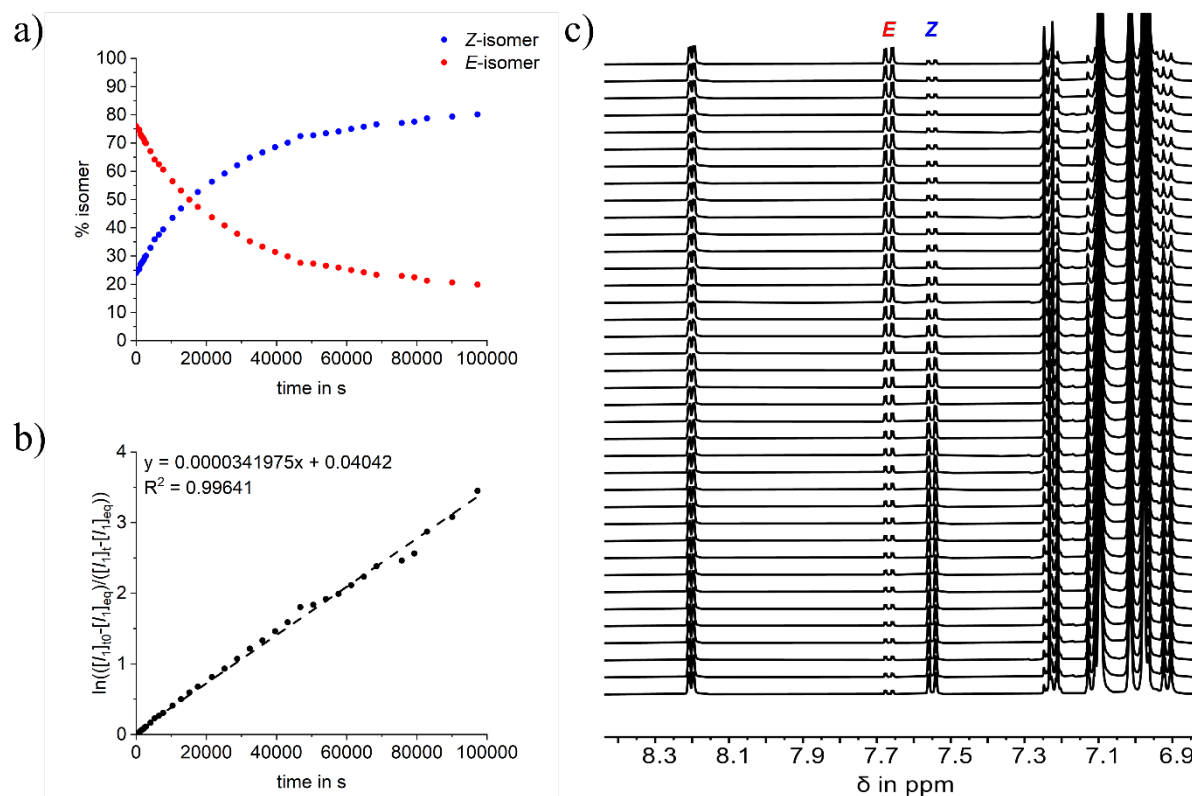

**Figure S21:** Thermal *E* to *Z* isomerization of diaryl-HTI **8** at 30 °C in toluene-*d*<sub>8</sub> solution in the dark. The metastable *E*-isomer was enriched with 450 nm light irradiation before the measurement; a) temporal change of the isomeric composition while heating at 30 °C. b) first order kinetic analysis of the thermal *E* to *Z* isomerization by plotting equation 9. The rate constant  $k_{E/Z}$  is obtained from the slope of the linear fit. c) partial <sup>1</sup>H NMR spectra (400 MHz, toluene-*d*<sub>8</sub>, 30 °C) measured in defined time intervals while heating the NMR-sample at 30 °C.

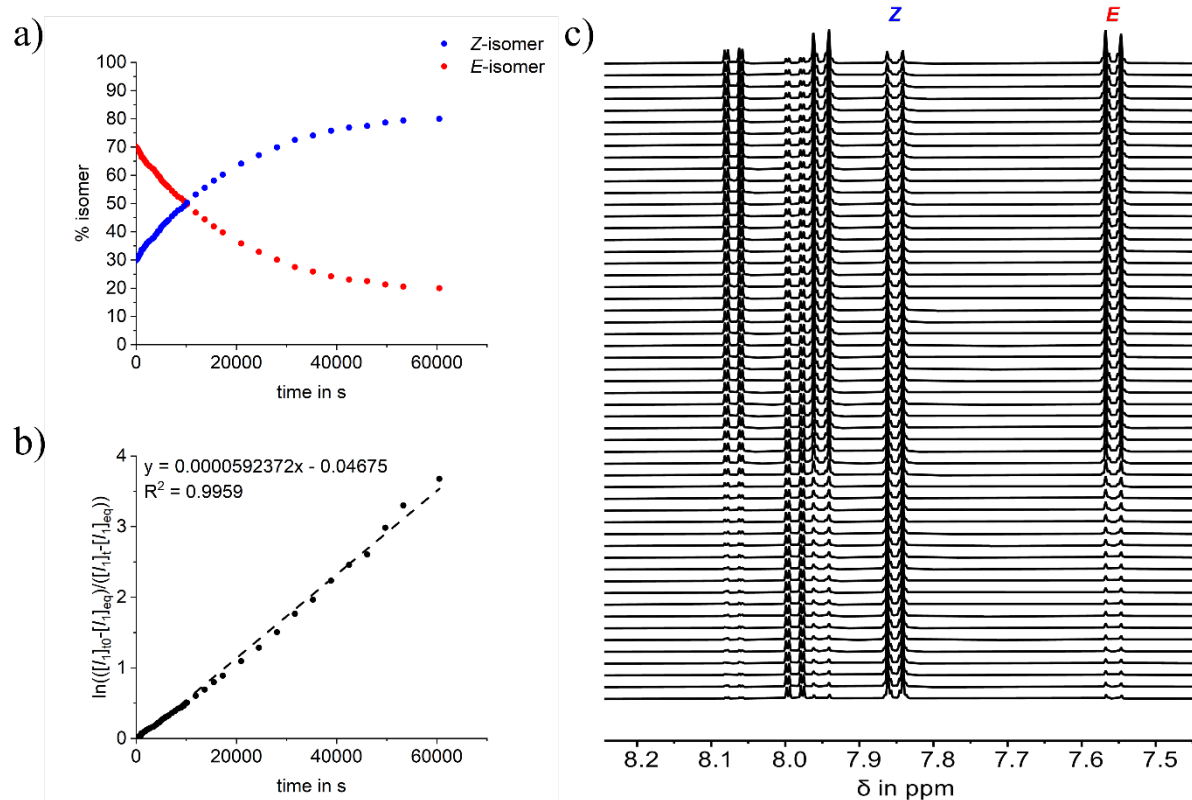

**Figure S22:** Thermal *E* to *Z* isomerization of diaryl-HTI **8** at 40 °C in DMSO- $d_6$  solution in the dark. The metastable *E*-isomer was enriched with 470 nm light irradiation before the measurement; a) temporal change of the isomeric composition while heating at 40 °C; b) first order kinetic analysis of the thermal *E* to *Z* isomerization by plotting equation 9. The rate constant  $k_{E/Z}$  is obtained from the slope of the linear fit; c) partial  $^1\text{H}$  NMR spectra (400 MHz, DMSO- $d_6$ , 40 °C) measured in defined time intervals while heating the NMR-sample at 40 °C.

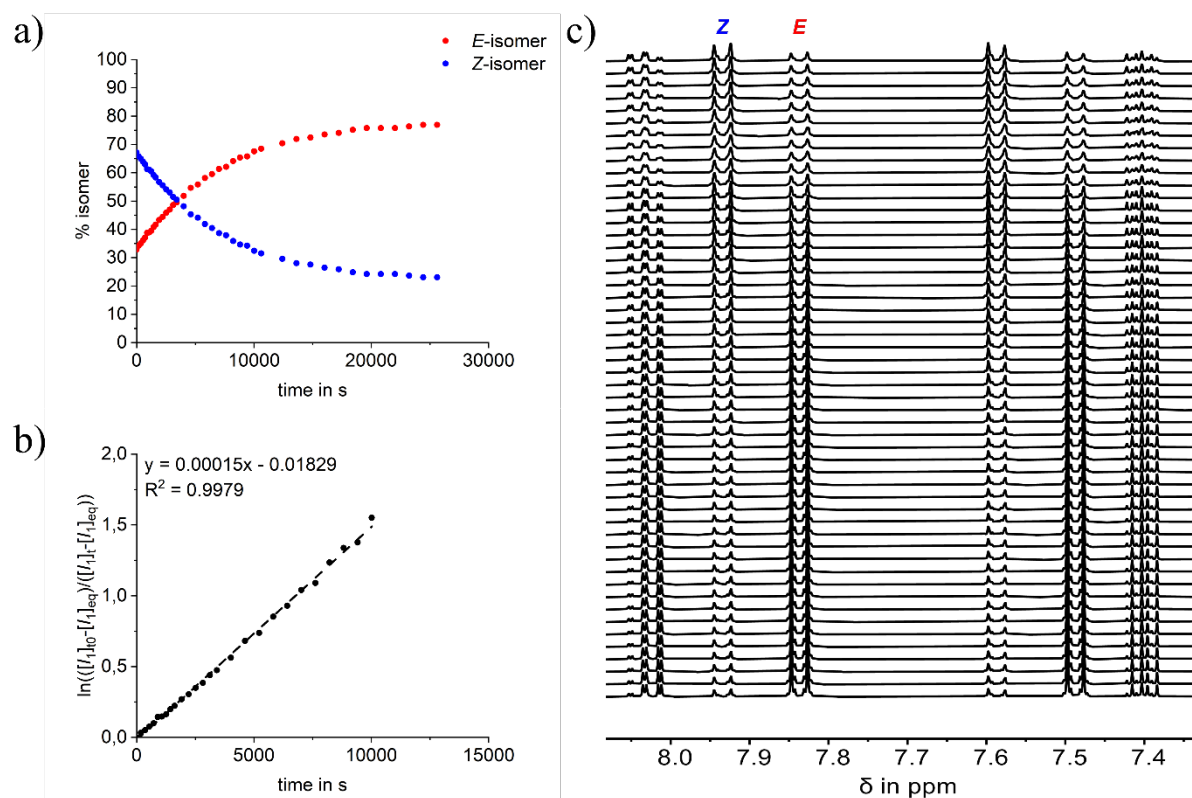

**Figure S23:** Thermal Z to E isomerization of diaryl-HTI **9** at 60 °C in DMSO-*d*<sub>6</sub> solution in the dark. The metastable Z-isomer was enriched with 435 nm light irradiation before the measurement; a) temporal change of the isomeric composition while heating at 60 °C; b) first order kinetic analysis of the thermal Z to E isomerization by plotting equation 9. The rate constant  $k_{E/Z}$  is obtained from the slope of the linear fit; c) partial <sup>1</sup>H NMR spectra (500 MHz, DMSO-*d*<sub>6</sub>, 60 °C) measured in defined time intervals while heating the NMR-sample at 60 °C.

**Table S2:** Gibbs energies of activation  $\Delta G^\ddagger$  and corresponding half-lives (linearly extrapolated to 23 °C) for the thermal *E* to *Z* isomerization of diaryl-HTIs **2**, **3**, **4**, **7**, **8**, and **9** in toluene and/or DMSO solution.

| Diaryl-HTI | Solvent | $\Delta G^\ddagger$ (thermal <i>E/Z</i> equil)<br>kcal·mol <sup>-1</sup> | Equilibration half-life of pure <i>E</i> isomer at 23 °C | Slope of the linear fit<br>(error)                    | Intercept of the linear fit<br>(error) |
|------------|---------|--------------------------------------------------------------------------|----------------------------------------------------------|-------------------------------------------------------|----------------------------------------|
| <b>8</b>   | toluene | 24.054±0.006                                                             | 16 h                                                     | 3.4198·10 <sup>-5</sup><br>(± 3.42·10 <sup>-7</sup> ) | 0.04042<br>(± 0.01456)                 |
|            | DMSO    | 24.546±0.006                                                             | 38 h                                                     | 5.9237·10 <sup>-5</sup><br>(± 5.66·10 <sup>-7</sup> ) | -0.04675<br>(± 0.01172)                |
| <b>7</b>   | toluene | 23.934±0.007                                                             | 14 h                                                     | 2.1475·10 <sup>-4</sup><br>(± 2.30·10 <sup>-6</sup> ) | -0.02094<br>(± 0.01445)                |
|            | DMSO    | 22.753±0.008                                                             | 2 h                                                      | 4.0142·10 <sup>-4</sup><br>(± 5.39·10 <sup>-6</sup> ) | 0.07529<br>(± 0.02140)                 |
| <b>3</b>   | toluene | 23.181±0.004                                                             | 4 h                                                      | 5.2085·10 <sup>-4</sup><br>(± 3.46·10 <sup>-6</sup> ) | 0.06590<br>(± 0.01248)                 |
|            | DMSO    | 27.696±0.023                                                             | 1 a                                                      | 1.8015·10 <sup>-4</sup><br>(± 5.84·10 <sup>-6</sup> ) | 0.01873<br>(± 0.04430)                 |
| <b>2</b>   | toluene | 25.704±0.006                                                             | 12 d                                                     | 4.7868·10 <sup>-5</sup><br>(± 4.39·10 <sup>-7</sup> ) | 0.03893<br>(± 0.01470)                 |
|            | DMSO    | 28.300±0.010                                                             | 3 a                                                      | 3.3844·10 <sup>-4</sup><br>(± 4.71·10 <sup>-6</sup> ) | -0.02211<br>(± 0.02603)                |
| <b>4</b>   | DMSO    | 27.773±0.012                                                             | 1 a                                                      | 2.1738·10 <sup>-4</sup><br>(± 3.67·10 <sup>-6</sup> ) | 0.16367<br>(± 0.02842)                 |
| <b>9</b>   | DMSO    | 25.577±0.008                                                             | 16 d                                                     | 1.5040·10 <sup>-4</sup><br>(± 1.38·10 <sup>-6</sup> ) | -0.01829<br>(± 0.00669)                |

## Quantum Yield Determination

Quantum yield measurements were performed on the instrumental setup developed by the group of *E. Riedle*.<sup>[6]</sup> A defined volume (2 mL) of toluene or benzene were filled in a cuvette and the illumination power  $P_{\text{ill}}$  was measured. Afterwards, diaryl-HTIs **2**, **3**, **4**, **7**, **8**, or **9** were added to the cuvette and the absorption was adjusted between 1.2 and 2.5 intensity. The solution was irradiated with 455 nm or 425 nm light in defined time intervals. After each irradiation cycle, the power readout of the solar cell detector was recorded and UV/Vis absorption spectra were measured. The change in concentration and therefore the number of isomerized molecules is calculated from the extinction coefficients.

The photochemical quantum yield  $\Phi$  of a particular wavelength is calculated from the ratio between the number of isomerized molecules and the number of absorbed photons:

$$\Phi(\lambda) = \frac{N(\text{isomerized molecules})}{N(\text{absorbed photons})} \quad (\text{eq. 14})$$

The change in the number of isomerized molecules over a defined time interval is expressed by the following differential equations 15 and 16:

$$\frac{dN_Z(t)}{dt} = -\Phi_{Z \rightarrow E} \int \frac{c_Z(t) \cdot \varepsilon_Z(\lambda)}{c_Z(t) \cdot \varepsilon_Z(\lambda) + c_E(t) \cdot \varepsilon_E(\lambda)} \cdot \frac{P_{\text{ill}} f(\lambda) \cdot \lambda}{h \cdot c} \cdot A(t, \lambda) d\lambda \quad (\text{eq. 15})$$

$$+ \Phi_{E \rightarrow Z} \int \frac{c_E(t) \cdot \varepsilon_E(\lambda)}{c_Z(t) \cdot \varepsilon_Z(\lambda) + c_E(t) \cdot \varepsilon_E(\lambda)} \cdot \frac{P_{\text{ill}} f(\lambda) \cdot \lambda}{h \cdot c} \cdot A(t, \lambda) d\lambda$$

$$\frac{dN_E(t)}{dt} = -\Phi_{E \rightarrow Z} \int \frac{c_E(t) \cdot \varepsilon_E(\lambda)}{c_Z(t) \cdot \varepsilon_Z(\lambda) + c_E(t) \cdot \varepsilon_E(\lambda)} \cdot \frac{P_{\text{ill}} f(\lambda) \cdot \lambda}{h \cdot c} \cdot A(t, \lambda) d\lambda \quad (\text{eq. 16})$$

$$+ \Phi_{Z \rightarrow E} \int \frac{c_Z(t) \cdot \varepsilon_Z(\lambda)}{c_Z(t) \cdot \varepsilon_Z(\lambda) + c_E(t) \cdot \varepsilon_E(\lambda)} \cdot \frac{P_{\text{ill}} f(\lambda) \cdot \lambda}{h \cdot c} \cdot A(t, \lambda) d\lambda$$

with the number of molecules in *Z* configuration  $N_Z$ , the number of molecules in *E* configuration  $N_E$ , the concentration of the *Z*-isomer at time  $t$   $c_Z(t)$ , the concentration of *E*-isomer at time  $t$   $c_E(t)$ , the extinction coefficients at wavelength  $\lambda$  of the *Z*- and *E*-isomer  $\varepsilon_Z(\lambda)$  and  $\varepsilon_E(\lambda)$ , respectively, the illumination power  $P_{\text{ill}}$ , the spectral distribution of the LED light  $f(\lambda)$ , the Planck's constant  $h$  ( $6.62607 \cdot 10^{-34}$  J·s), the speed of light  $c$  ( $2.99792 \cdot 10^8$  m·s<sup>-1</sup>), and the absorbance at time  $t$  and wavelength  $\lambda$   $A(t, \lambda)$ .

Furthermore, the absorbance depends on the thickness of the cuvette  $d$ , the concentration  $c$  of the  $Z$ - and  $E$ -isomer and the respective extinction coefficient  $\varepsilon$ :

$$A(t, \lambda) = 1 - 10^{-d(c_Z(t) \cdot \varepsilon_Z(\lambda) + c_E(t) \cdot \varepsilon_E(\lambda))} \quad (\text{eq. 16})$$

The forward and backward quantum yields  $\Phi_{Z \rightarrow E}$  and  $\Phi_{E \rightarrow Z}$  are both included in the calculation after modelling of the conversion. Therefore, only one measurement is required to extract the quantum yields for both photoisomerizations  $Z$  to  $E$  and vice versa.

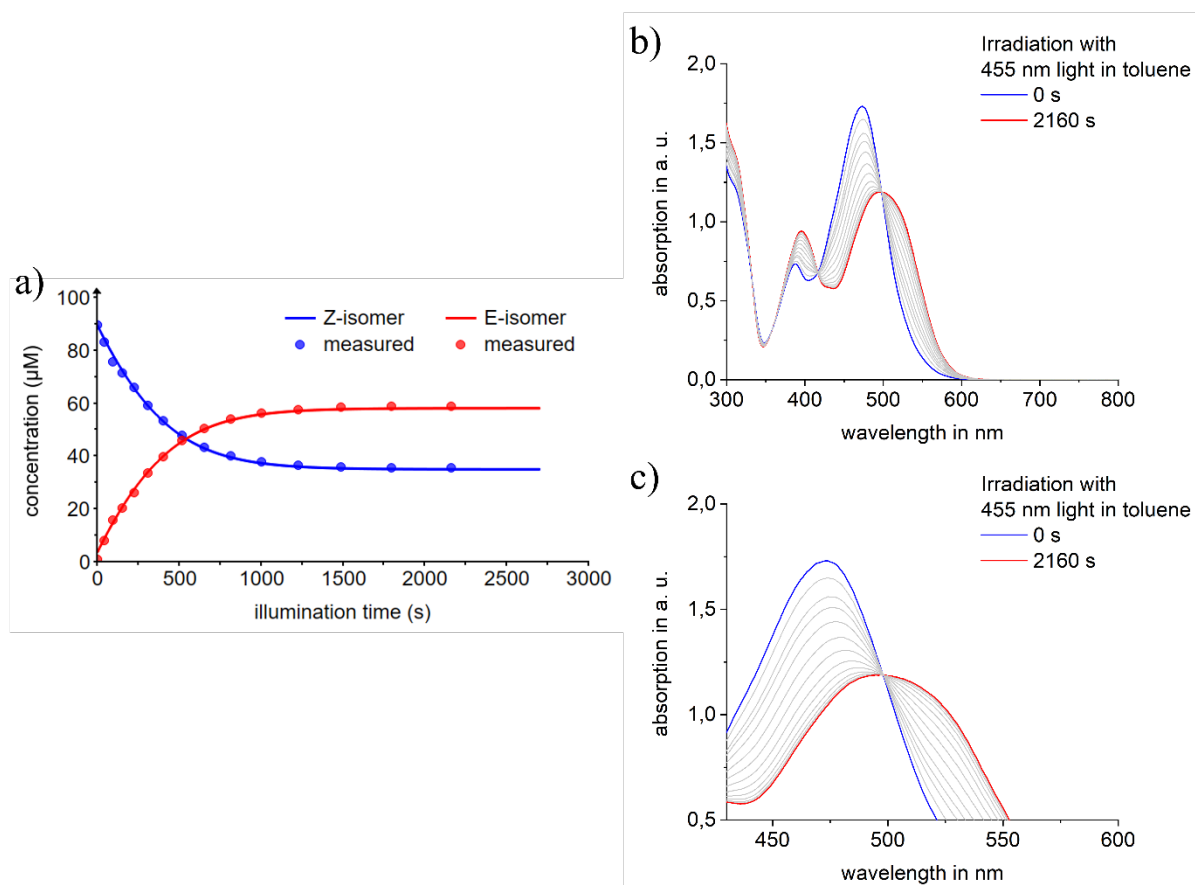

**Figure S24:** Quantum yield determination for the *Z* to *E* and *E* to *Z* photoisomerization of diaryl-HTI **2** in toluene solution during irradiation with 455 nm light; a) concentration change of *Z* and *E* isomer during the irradiation with 455 nm light; b) UV/Vis absorption spectra measured in defined time intervals during irradiation with 455 nm light; c) section of the UV/Vis absorption spectra depicting the isosbestic point at longer wavelengths.

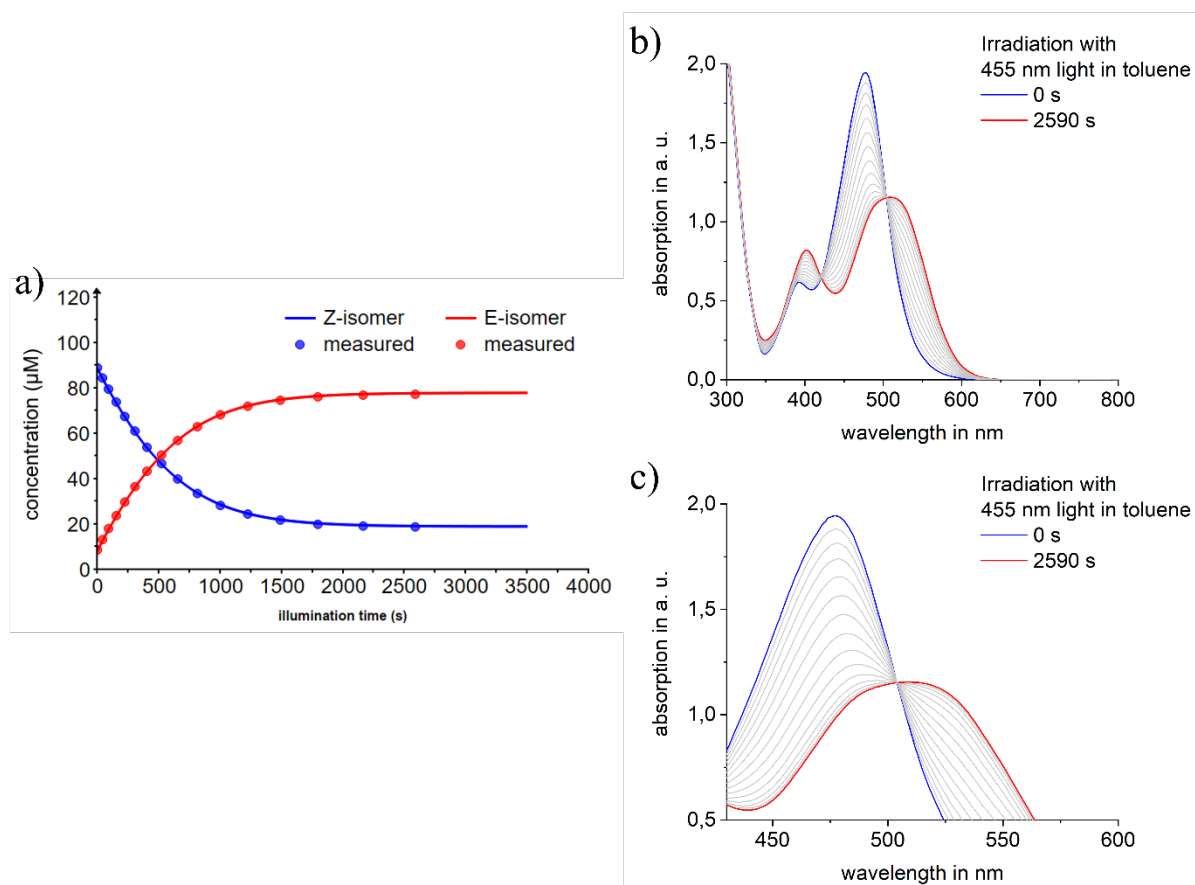

**Figure S25:** Quantum yield determination for the *Z* to *E* and *E* to *Z* photoisomerization of diaryl-HTI 3 in toluene solution during irradiation with 455 nm light; a) concentration change of *Z* and *E* isomer during the irradiation with 455 nm light; b) UV/Vis absorption spectra measured in defined time intervals during irradiation with 455 nm light; c) section of the UV/Vis absorption spectra depicting the isosbestic point at longer wavelengths.

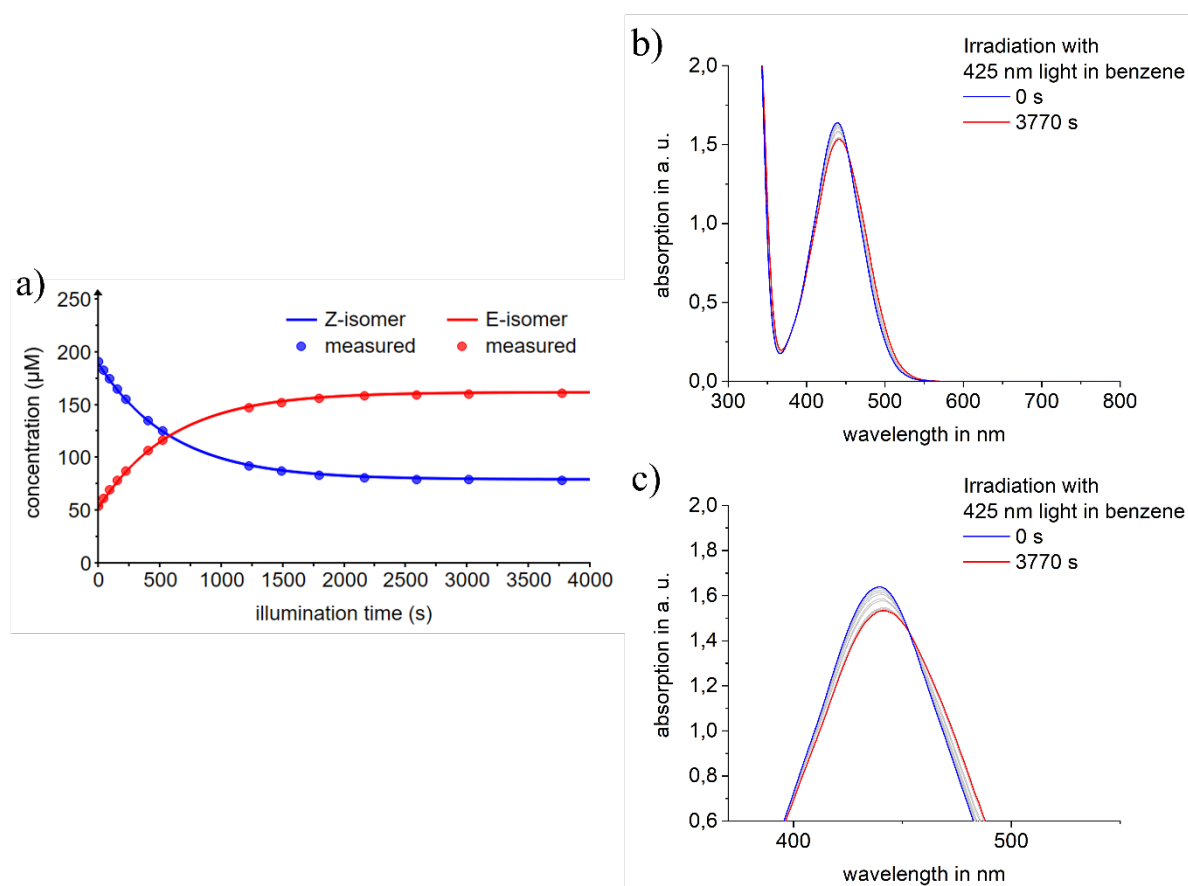

**Figure S26:** Quantum yield determination for the *Z* to *E* and *E* to *Z* photoisomerization of diaryl-HTI 4 in benzene solution during irradiation with 425 nm light; a) concentration change of *Z* and *E* isomer during the irradiation with 425 nm light; b) UV/Vis absorption spectra measured in defined time intervals during irradiation with 425 nm light; c) section of the UV/Vis absorption spectra depicting the isosbestic point at longer wavelengths.

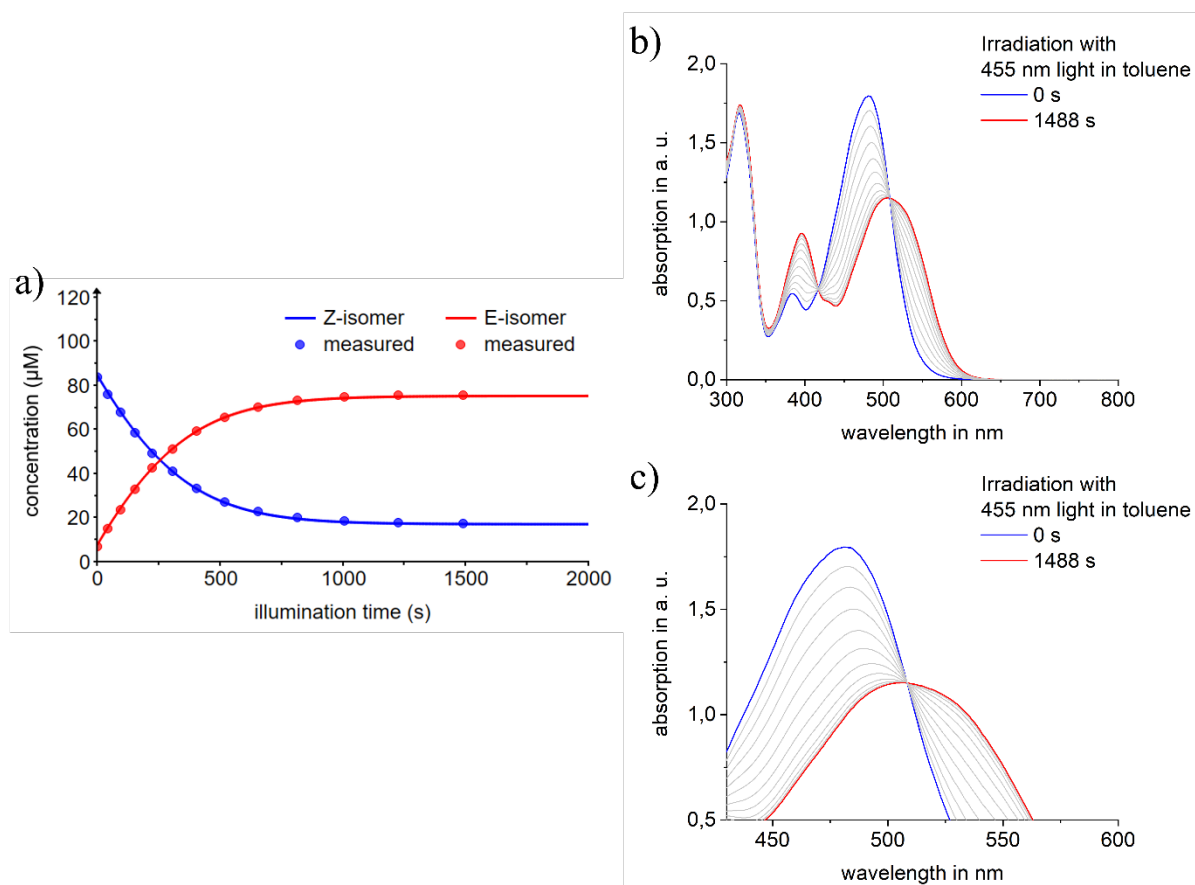

**Figure S27:** Quantum yield determination for the *Z* to *E* and *E* to *Z* photoisomerization of diaryl-HTI 7 in toluene solution during irradiation with 455 nm light; a) concentration change of *Z* and *E* isomer during the irradiation with 455 nm light; b) UV/Vis absorption spectra measured in defined time intervals during irradiation with 455 nm light; c) section of the UV/Vis absorption spectra depicting the isosbestic point at longer wavelengths.

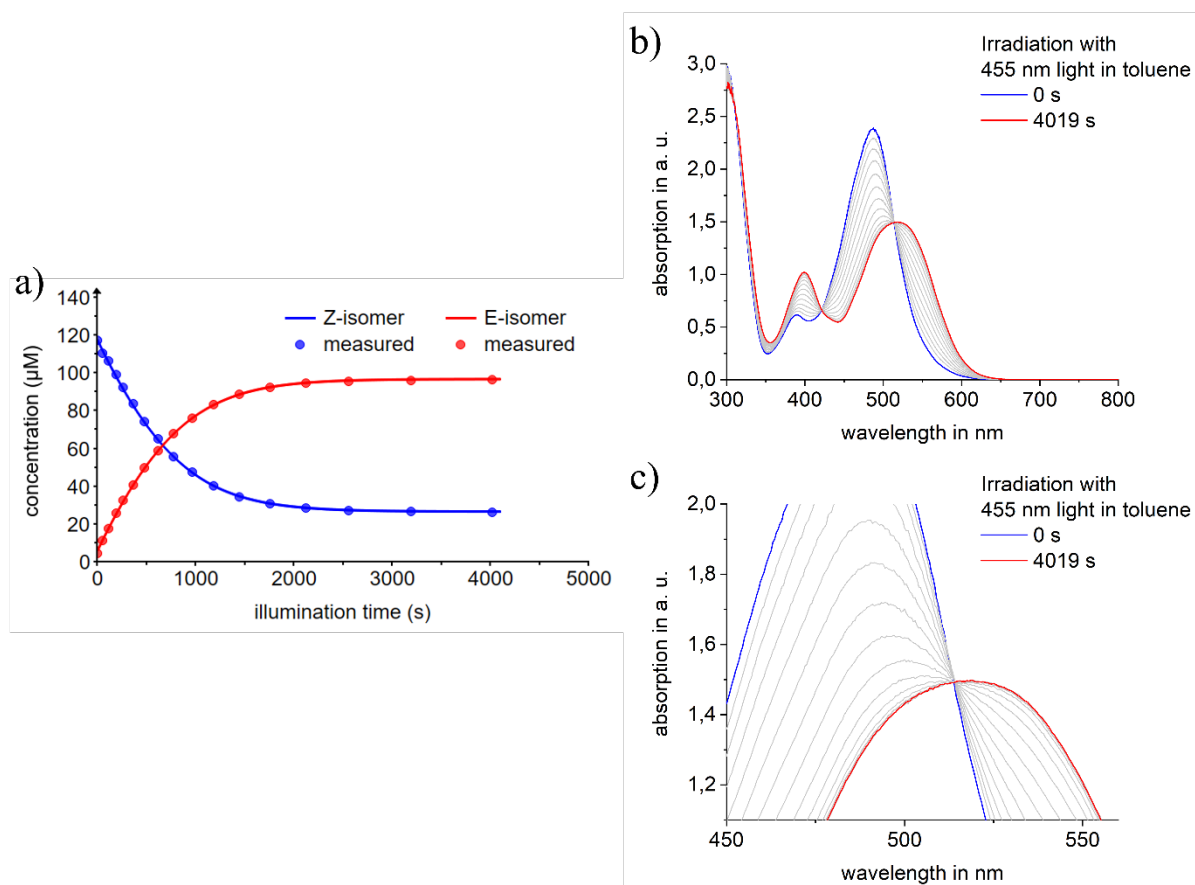

**Figure S28:** Quantum yield determination for the *Z* to *E* and *E* to *Z* photoisomerization of diaryl-HTI **8** in toluene solution during irradiation with 455 nm light; a) concentration change of *Z* and *E* isomer during the irradiation with 455 nm light; b) UV/Vis absorption spectra measured in defined time intervals during irradiation with 455 nm light; c) section of the UV/Vis absorption spectra depicting the isosbestic point at longer wavelengths.

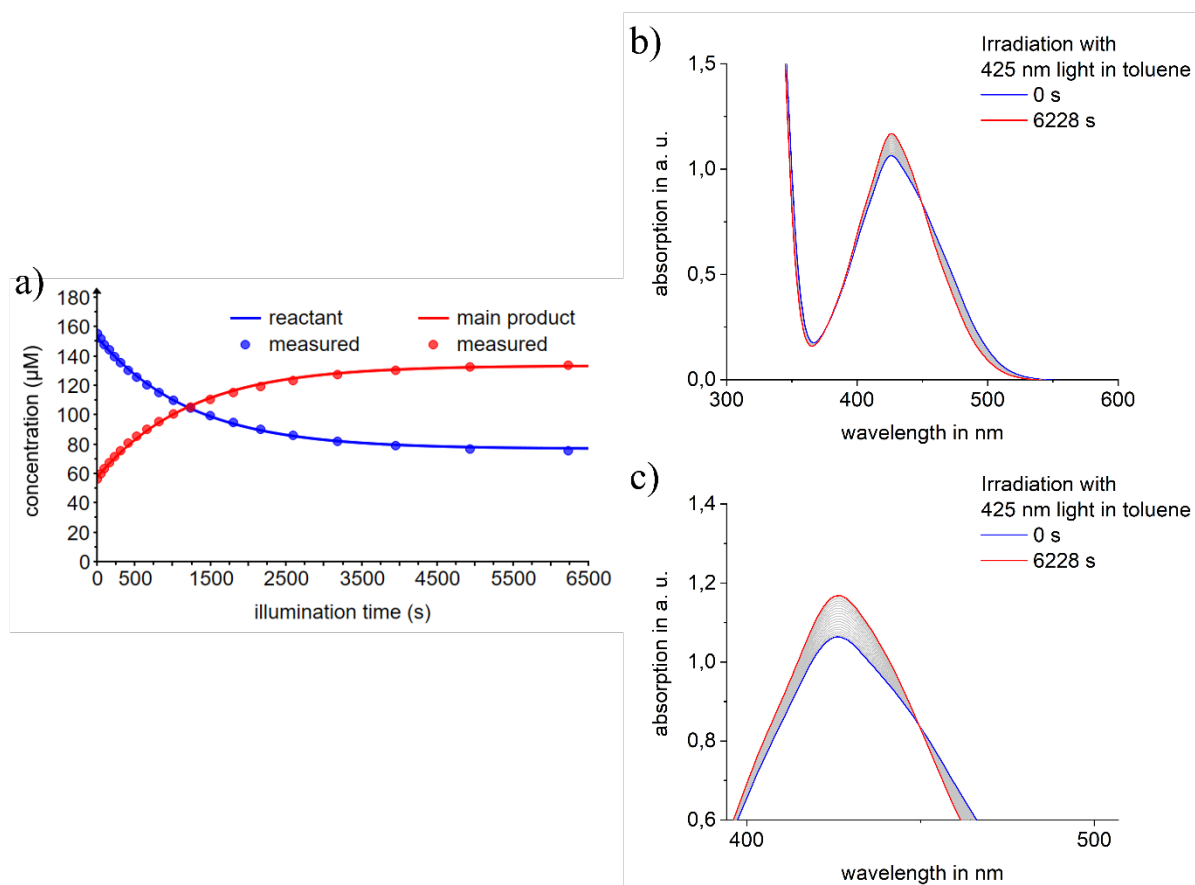

**Figure S29:** Quantum yield determination for the *Z* to *E* and *E* to *Z* photoisomerization of diaryl-HTI **9** in toluene solution during irradiation with 425 nm light; a) concentration change of *Z* and *E* isomer during the irradiation with 425 nm light; b) UV/Vis absorption spectra measured in defined time intervals during irradiation with 425 nm light; c) section of the UV/Vis absorption spectra depicting the isosbestic point at longer wavelengths.

**Table S3:** Measured quantum yields for the *Z* to *E* and *E* to *Z* photoisomerizations of diaryl-HTIs **2**, **3**, **4**, **7**, **8**, and **9** in toluene solution.

| Diaryl-HTI | Solvent | Wavelength | $\Phi_{Z \text{ to } E}$ | $\Phi_{E \text{ to } Z}$ |
|------------|---------|------------|--------------------------|--------------------------|
| <b>9</b>   | toluene | 425 nm     | 5%                       |                          |
|            |         | 425 nm     |                          | 3%                       |
| <b>8</b>   | toluene | 455 nm     | 4%                       |                          |
|            |         | 455 nm     |                          | 4%                       |
| <b>7</b>   | toluene | 455 nm     | 6%                       |                          |
|            |         | 455 nm     |                          | 5%                       |
| <b>4</b>   | benzene | 425 nm     | 11%                      |                          |
|            |         | 425 nm     |                          | 6%                       |
| <b>3</b>   | toluene | 455 nm     | 3%                       |                          |
|            |         | 455 nm     |                          | 3%                       |
| <b>2</b>   | toluene | 455 nm     | 3%                       |                          |
|            |         | 455 nm     |                          | 11%                      |

## Molecular Logic Application of Diaryl-HTIs **3** and **8** in Logic Gates and Keypad Locks

The behavior of diaryl-HTIs **3** and **8** under acidic conditions was investigated by UV/Vis absorption spectroscopy in toluene solution. Therefore, stock solutions of **3** and **8** with defined concentrations ( $2.99 \cdot 10^{-5}$  mol/L and  $3.03 \cdot 10^{-5}$  mol/L) were prepared and 2.0 mL were filled into a cuvette. A solution of trifluoroacetic acid (TFA) in toluene was added (0-2,000 equiv.) stepwise to the cuvette and UV/Vis absorption spectra were recorded until no changes were observed.

Diaryl-HTI **8** bears two protonation sides on the pyridine-nitrogen and the dimethylamine moiety. After protonation, two new absorption maxima at 420 nm and 549 nm evolved associated with protonation on both the amine and the pyridine. Due to the lack of separate addressability of only one protonation side at the one time further studies regarding the use of diaryl-HTI **8** in logic gates were not carried out.

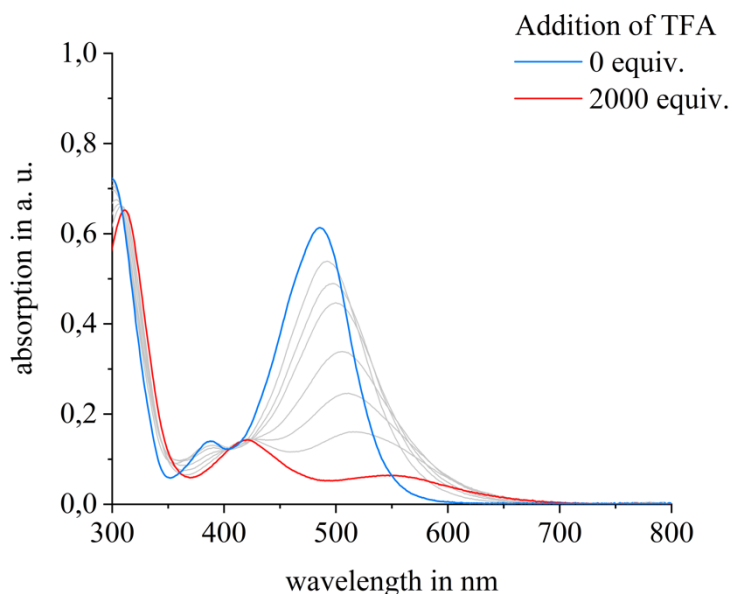

**Figure S30:** UV/Vis absorption spectra of diaryl-HTI **8** in toluene solution recorded after stepwise addition of TFA (0-2,000 equiv. grey to red spectra).

In diaryl-HTI **3** only the dimethylamine moiety is predestined for protonation with TFA. The absorption changes during stepwise protonation with TFA were investigated by UV/Vis absorption spectroscopy in toluene solution. Deprotonation of protonated diaryl-HTI **3** was

carried out by the addition of 2,000 equiv. triethylamine (TEA) to recover unprotonated diaryl-HTI **3**. After one protonation and deprotonation cycle, irradiation with 470 nm and 617 nm light induced enrichment of the *E*- and *Z*-isomer, respectively. Thus, the photoswitching properties were recovered after acid and base induced changes and the application of diaryl-HTI **3** in logic gates could be further investigated.

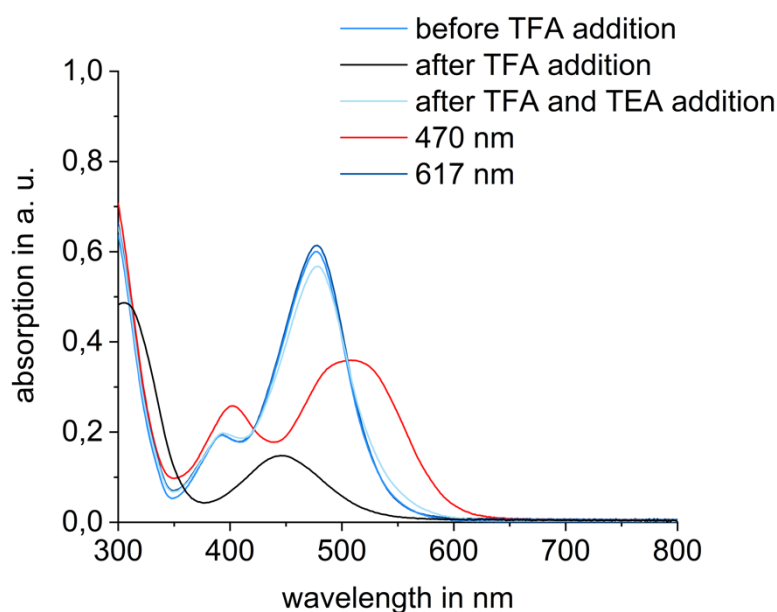

**Figure S31:** UV/Vis absorption spectra of diaryl-HTI **3** in toluene solution before addition of TFA, after addition of TFA, after addition of TFA and TEA, and after irradiation with 470 nm and 617 nm light following the protonation and deprotonation cycle.

With the presence of a protonation site at the dimethylamine moiety and the photoisomerizable double-bond as independently triggerable units in diaryl-HTI **3**, a system composed of three states (*E*-**3**, *Z*-**3**, and *Z*-**3H**<sup>+</sup>) can be setup. By using four different orthogonal inputs (470 nm light, 617 nm light, TFA and TEA) the three states are reversibly interconverted. For protonation and deprotonation 2,000 equiv. of TFA and TEA are used. The difference in the absorption spectra of *E*-**3**, *Z*-**3**, and *Z*-**3H**<sup>+</sup> allows the definition of four threshold limits at different output readouts (Absorption (A)>0.05 at 580 nm, A>0.2 at 500 nm, A>0.5 at 480 nm, and A>0.27 at 328 nm). Therefore, a variety of different molecular logic operations can be elicited with diaryl-HTI **3** as outlined below.

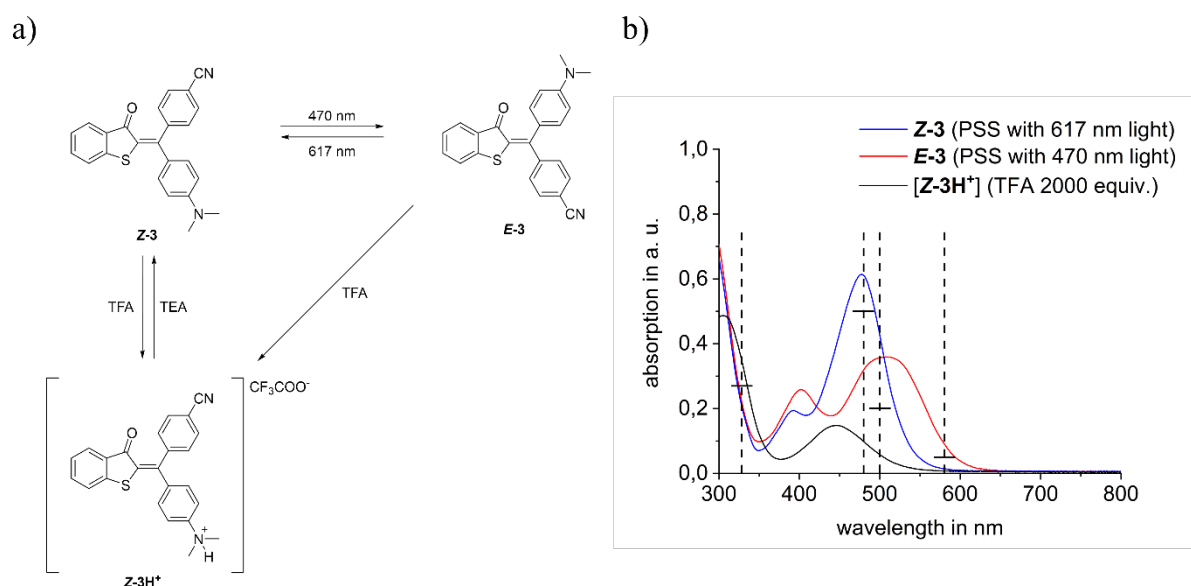

**Figure S32:** Overview of a three-state molecular logic system composed of *E*-3, *Z*-3, and *Z*-3H<sup>+</sup>; a) schematic representation for the interconversion of *E*-3, *Z*-3, and *Z*-3H<sup>+</sup> with 470 nm light, 617 nm light, TFA and TEA as orthogonal inputs; b) UV/Vis absorption spectra of *E*-3, *Z*-3, and *Z*-3H<sup>+</sup> in toluene solution with the output readouts (vertical dashed lines) and the threshold levels (horizontal lines).

Five different 2-bit logic gates are generated starting from *E*-3 and *Z*-3H<sup>+</sup>. A NOR, NOT, SAND and Identity gate are setup with *E*-3 as initial state and TFA and 617 nm light as orthogonal inputs. As reset the two triggers TEA and 470 nm light have to be given. Furthermore, a AND, SAND, Identity and NOT gate can be constructed from *Z*-3H<sup>+</sup> as starting state with TEA and 470 nm light serving as inputs. As reset the two triggers TFA and 617 nm light have to be given in this case.

a)

| Input 1     | Input 2 | Out 1: NOR | Out 2: SAND | Out 3: NOT | Out 4: Identity |
|-------------|---------|------------|-------------|------------|-----------------|
| TFA         | 617 nm  | A>0.05 at  | A>0.4 at    | A>0.2 at   | A>0.27 at       |
| 2000 equiv. | light   | 580 nm     | 480 nm      | 500 nm     | 328 nm          |
| 0           | 0       | 1          | 0           | 1          | 0               |
| 0           | 1       | 0          | 1           | 1          | 0               |
| 1           | 0       | 0          | 0           | 0          | 1               |
| 1           | 1       | 0          | 0           | 0          | 1               |

b)

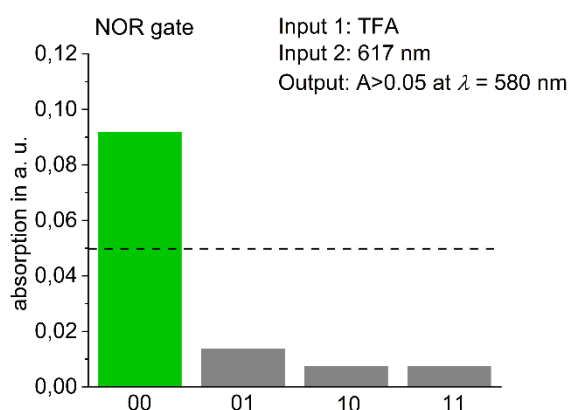

c)

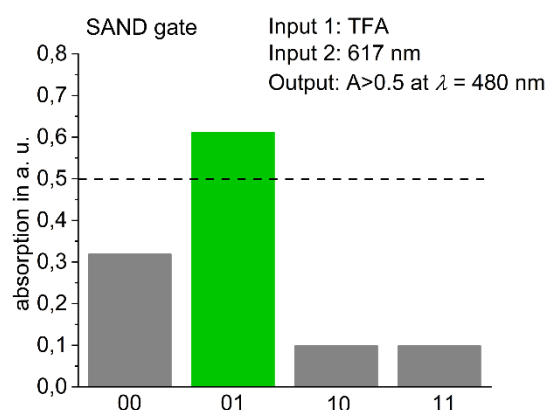

d)

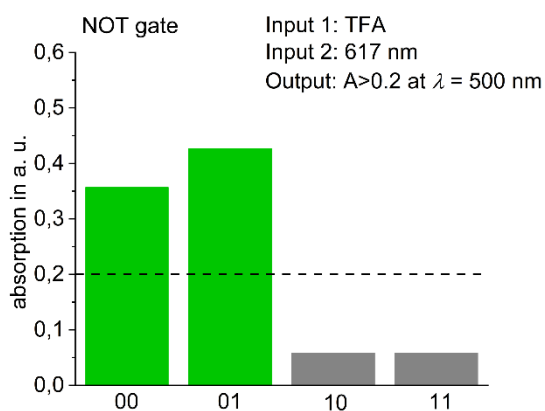

e)

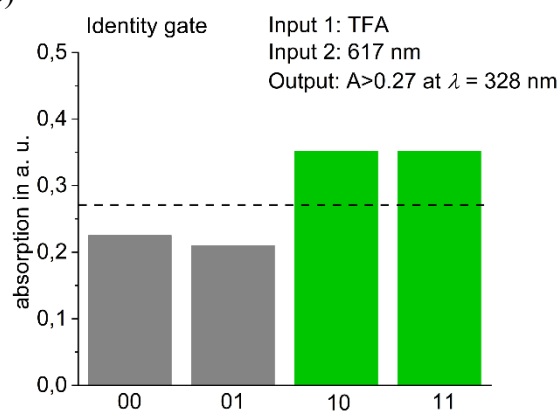

**Figure S33:** Overview for 2-bit molecular logic systems starting from **E-3** and using TFA (2,000 equiv.) and 617 nm light as inputs; a) truth table for the NOR-, SAND-, NOT-, and Identity gates; b) absorptions at output readout 580 nm (threshold level shown as horizontal dashed line) representing a NOR-gate (truth output colored in green and false output colored in grey); c) absorptions at output readout 480 nm (threshold level shown as horizontal dashed line) representing a SAND-gate (truth output colored in green and false output colored in grey); d) absorptions at output readout 500 nm (threshold level shown as horizontal dashed line) representing a NOT-gate (truth output colored in green and false output colored in grey); e) absorptions at output readout 328 nm (threshold level shown as horizontal dashed line) representing an Identity gate (truth output colored in green and false output colored in grey).

a)

| Input 1<br>TEA<br>2000 equiv. | Input 2<br>470 nm<br>light | Out 1: AND<br>A>0.05 at<br>580 nm | Out 2: SAND<br>A>0.4 at<br>480 nm | Out 3: Identity<br>A>0.2 at<br>500 nm | Out 4: NOT<br>A>0.27 at<br>328 nm |
|-------------------------------|----------------------------|-----------------------------------|-----------------------------------|---------------------------------------|-----------------------------------|
| 0                             | 0                          | 0                                 | 0                                 | 0                                     | 1                                 |
| 0                             | 1                          | 0                                 | 0                                 | 0                                     | 1                                 |
| 1                             | 0                          | 0                                 | 1                                 | 1                                     | 0                                 |
| 1                             | 1                          | 1                                 | 0                                 | 1                                     | 0                                 |

b)

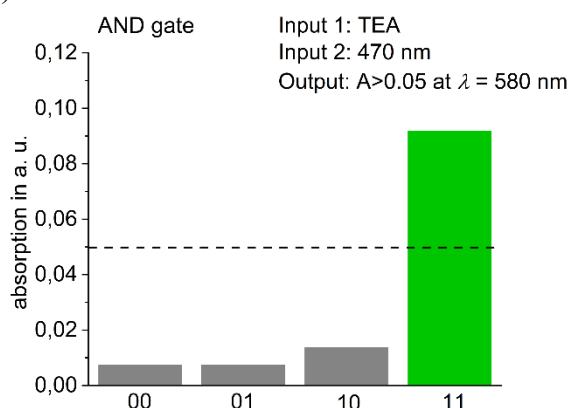

c)

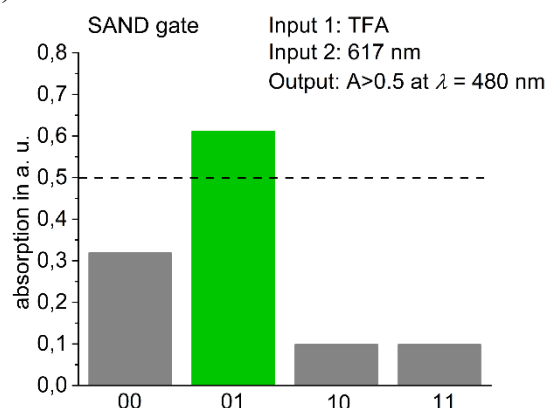

d)

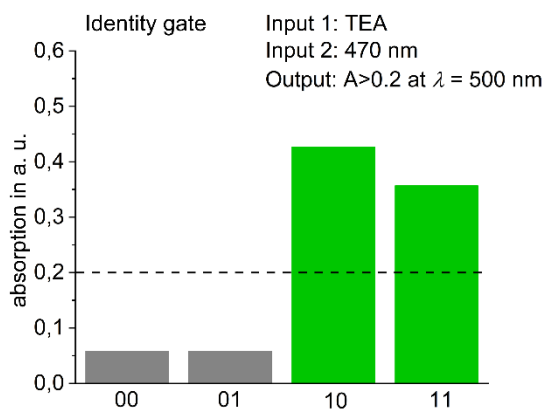

e)

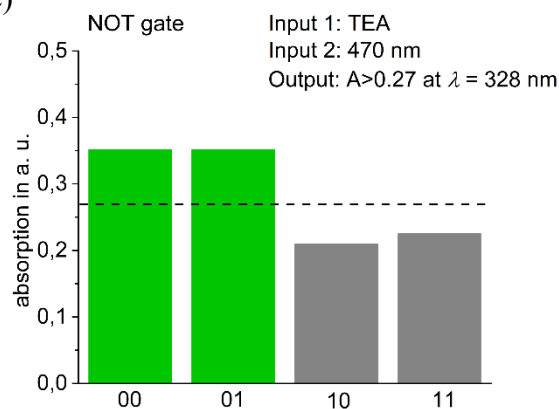

**Figure S34:** Overview for 2-bit molecular logic systems starting from **Z-3H<sup>+</sup>** and using TEA (2,000 equiv.) and 470 nm light as inputs; a) truth table for the AND, SAND, Identity, and NOT gates; b) absorptions at output readout 580 nm (threshold level shown as horizontal dashed line) representing an AND gate (truth output colored in green and false output colored in grey); c) absorptions at output readout 480 nm (threshold level shown as horizontal dashed line) representing a SAND gate (truth output colored in green and false output colored in grey); d) absorptions at output readout 500 nm (threshold level shown as horizontal dashed line) representing an Identity gate (truth output colored in green and false output colored in grey); e) absorptions at output readout 328 nm (threshold level shown as horizontal dashed line) representing a NOT gate (truth output colored in green and false output colored in grey).

A molecular binary multiplier can be setup with two inputs (TEA and 470 nm light) and the output readout at 580 nm ( $A > 0.05$ ). Herein, the binary numbers of the two inputs are multiplied to give the binary combination of the corresponding binary products. The binary products are finally translated to the decimal values.

**Table S4:** Truth table for a binary multiplier with TEA and 470 nm light as inputs and the output readout at 580 nm.

| Input 1<br>TEA<br>2000 equiv. | Input 2<br>470 nm light | Out 1:<br>$A > 0.05$ at<br>580 nm | Binary Product | Decimal Value |
|-------------------------------|-------------------------|-----------------------------------|----------------|---------------|
| 0                             | 0                       | 0                                 | 00             | 0             |
| 0                             | 1                       | 0                                 | 00             | 0             |
| 1                             | 0                       | 0                                 | 00             | 0             |
| 1                             | 1                       | 1                                 | 01             | 1             |

The irradiation (470 nm and 617 nm light) and protonation/deprotonation (TFA and TEA) inputs are further utilized to realize 3-input and 4-input molecular keypad locks starting from the **Z-3H<sup>+</sup>** state. For this purpose, TFA (2,000 equiv.), TEA (2,000 equiv.) and 470 nm light are used to generate a 3-input molecular keypad lock with one true input combination (one out of six) and a 3-input molecular keypad lock with two true input combinations (two out of six) using TEA, 470 nm and 617 nm light. At last, all four inputs are integrated into a 4-input molecular keypad lock with three true input combinations (three out of 24).

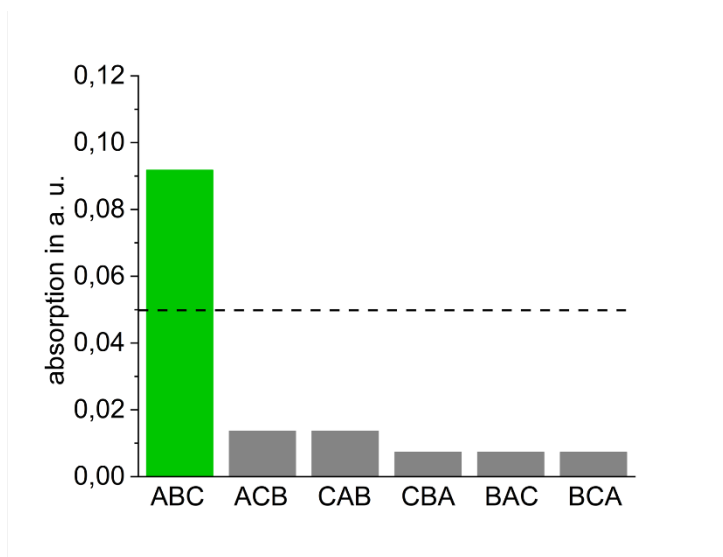

| Sequence | State after input 1 | State after input 1 and 2 | State after input 1, 2, and 3 | Output<br>A>0.05 at 580 nm |
|----------|---------------------|---------------------------|-------------------------------|----------------------------|
| ABC      | Z-3H <sup>+</sup>   | Z-3                       | E-3                           | 1                          |
| ACB      | Z-3H <sup>+</sup>   | Z-3H <sup>+</sup>         | Z-3                           | 0                          |
| CAB      | Z-3H <sup>+</sup>   | Z-3H <sup>+</sup>         | Z-3                           | 0                          |
| CBA      | Z-3H <sup>+</sup>   | Z-3                       | Z-3H <sup>+</sup>             | 0                          |
| BAC      | Z-3                 | Z-3H <sup>+</sup>         | Z-3H <sup>+</sup>             | 0                          |
| BCA      | Z-3                 | E-3                       | Z-3H <sup>+</sup>             | 0                          |

**Figure S35:** Output readouts at 580 nm and the threshold limit at A>0.05 (dashed line) for a molecular keypad lock with three inputs, A (addition of TFA (2,000 equiv.)), B (addition of TEA (2,000 equiv.)), and C (irradiation with 470 nm light), beginning from **Z-3H<sup>+</sup>**. True and false readouts are colored in green and grey, respectively. The input sequences and states after each input are summarized in the table.

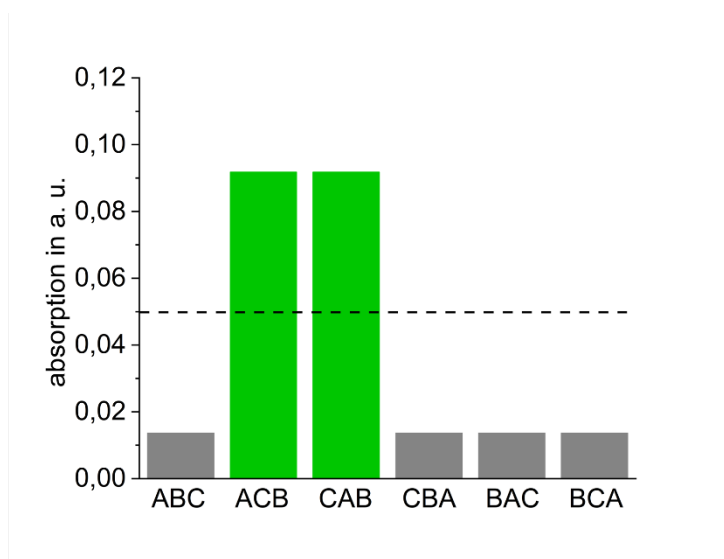

| Sequence | State after input 1 | State after input 1 and 2 | State after input 1, 2, and 3 | Output<br>A>0.05 at 580 nm |
|----------|---------------------|---------------------------|-------------------------------|----------------------------|
| ABC      | Z-3                 | E-3                       | Z-3                           | 0                          |
| ACB      | Z-3                 | Z-3                       | E-3                           | 1                          |
| CAB      | Z-3H <sup>+</sup>   | Z-3                       | E-3                           | 1                          |
| CBA      | Z-3H <sup>+</sup>   | Z-3H <sup>+</sup>         | Z-3                           | 0                          |
| BAC      | Z-3H <sup>+</sup>   | Z-3                       | Z-3                           | 0                          |
| BCA      | Z-3H <sup>+</sup>   | Z-3H <sup>+</sup>         | Z-3                           | 0                          |

**Figure S36:** Output readouts at 580 nm and the threshold limit at A>0.05 (dashed line) for a molecular keypad lock with three inputs, A (addition of TEA (2,000 equiv.)), B (irradiation with 470 nm light), and C (irradiation with 617 nm light), beginning from **Z-3H<sup>+</sup>**. True and false readouts are colored in green and grey, respectively. The input sequences and states after each input are summarized in the table.

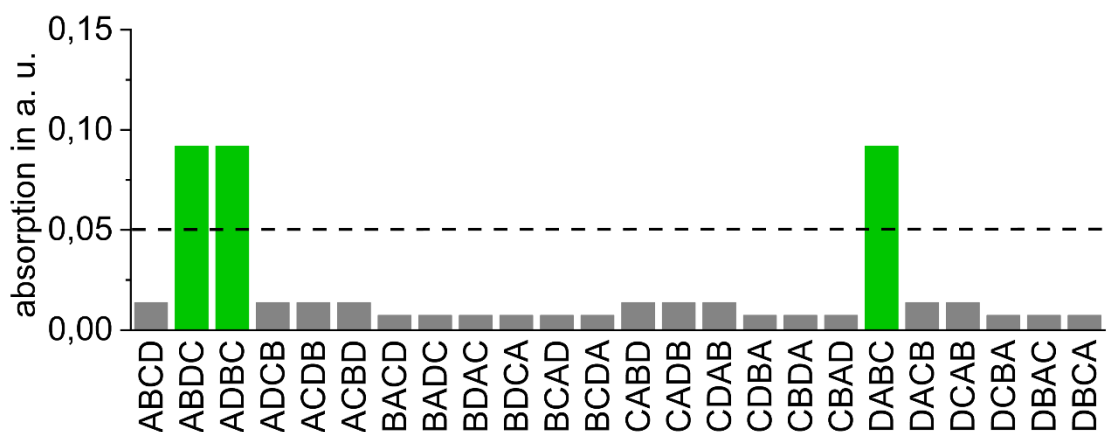

| Sequence | State after<br>input 1 | State after<br>input 1 and 2 | State after<br>input 1, 2, and 3 | State after input<br>1, 2, 3, and 4 | Output<br>A>0.05 at 580 nm |
|----------|------------------------|------------------------------|----------------------------------|-------------------------------------|----------------------------|
| ABCD     | Z-3H <sup>+</sup>      | Z-3                          | E-3                              | Z-3                                 | 0                          |
| ABDC     | Z-3H <sup>+</sup>      | Z-3                          | Z-3                              | E-3                                 | 1                          |
| ADBC     | Z-3H <sup>+</sup>      | Z-3H <sup>+</sup>            | Z-3                              | E-3                                 | 1                          |
| ADCB     | Z-3H <sup>+</sup>      | Z-3H <sup>+</sup>            | Z-3H <sup>+</sup>                | Z-3                                 | 0                          |
| ACDB     | Z-3H <sup>+</sup>      | Z-3H <sup>+</sup>            | Z-3H <sup>+</sup>                | Z-3                                 | 0                          |
| ACBD     | Z-3H <sup>+</sup>      | Z-3H <sup>+</sup>            | Z-3                              | Z-3                                 | 0                          |
| BACD     | Z-3                    | Z-3H <sup>+</sup>            | Z-3H <sup>+</sup>                | Z-3H <sup>+</sup>                   | 0                          |
| BADC     | Z-3                    | Z-3H <sup>+</sup>            | Z-3H <sup>+</sup>                | Z-3H <sup>+</sup>                   | 0                          |
| BDAC     | Z-3                    | Z-3                          | Z-3H <sup>+</sup>                | Z-3H <sup>+</sup>                   | 0                          |
| BDCA     | Z-3                    | Z-3                          | E-3                              | Z-3H <sup>+</sup>                   | 0                          |
| BCAD     | Z-3                    | E-3                          | Z-3H <sup>+</sup>                | Z-3H <sup>+</sup>                   | 0                          |
| BCDA     | Z-3                    | E-3                          | Z-3                              | Z-3H <sup>+</sup>                   | 0                          |
| CABD     | Z-3H <sup>+</sup>      | Z-3H <sup>+</sup>            | Z-3                              | Z-3                                 | 0                          |
| CADB     | Z-3H <sup>+</sup>      | Z-3H <sup>+</sup>            | Z-3H <sup>+</sup>                | Z-3                                 | 0                          |
| CDAB     | Z-3H <sup>+</sup>      | Z-3H <sup>+</sup>            | Z-3H <sup>+</sup>                | Z-3                                 | 0                          |
| CDBA     | Z-3H <sup>+</sup>      | Z-3H <sup>+</sup>            | Z-3                              | Z-3H <sup>+</sup>                   | 0                          |
| CBDA     | Z-3H <sup>+</sup>      | Z-3                          | Z-3                              | Z-3H <sup>+</sup>                   | 0                          |
| CBAD     | Z-3H <sup>+</sup>      | Z-3                          | Z-3H <sup>+</sup>                | Z-3H <sup>+</sup>                   | 0                          |
| DABC     | Z-3H <sup>+</sup>      | Z-3H <sup>+</sup>            | Z-3                              | E-3                                 | 1                          |
| DACB     | Z-3H <sup>+</sup>      | Z-3H <sup>+</sup>            | Z-3H <sup>+</sup>                | Z-3                                 | 0                          |
| DCAB     | Z-3H <sup>+</sup>      | Z-3H <sup>+</sup>            | Z-3H <sup>+</sup>                | Z-3                                 | 0                          |
| DCBA     | Z-3H <sup>+</sup>      | Z-3H <sup>+</sup>            | Z-3                              | Z-3H <sup>+</sup>                   | 0                          |
| DBAC     | Z-3H <sup>+</sup>      | Z-3                          | Z-3H <sup>+</sup>                | Z-3H <sup>+</sup>                   | 0                          |
| DBCA     | Z-3H <sup>+</sup>      | Z-3                          | E-3                              | Z-3H <sup>+</sup>                   | 0                          |

**Figure S37:** Output readouts at 580 nm and threshold limit at A>0.05 (dashed line) for a molecular keypad lock with four inputs, A (addition of TFA (2,000 equiv.)), B (addition of TEA (2,000 equiv.)), C (irradiation with 470 nm light), and D (irradiation with 617 nm light), beginning from **Z-3H<sup>+</sup>**. True and false readouts are colored in green and grey, respectively. The input sequences and states after each input sequence are summarized in the table.

## Theoretical Description of Diaryl-HTI **3** and Diaryl-HTI **8**

The structures for the *Z*- and *E*-isomer of diaryl-HTI **3** and **8** in toluene were optimized on the B3LYP level of theory using the IEFPCM solvent model. The basis set 6-311+G(d,p) with ultrafine integration grid and tight optimization thresholds was employed. The minima were confirmed by frequency analysis of the obtained structures. Molecular Orbitals (MOs) were visualized from the fchk file.

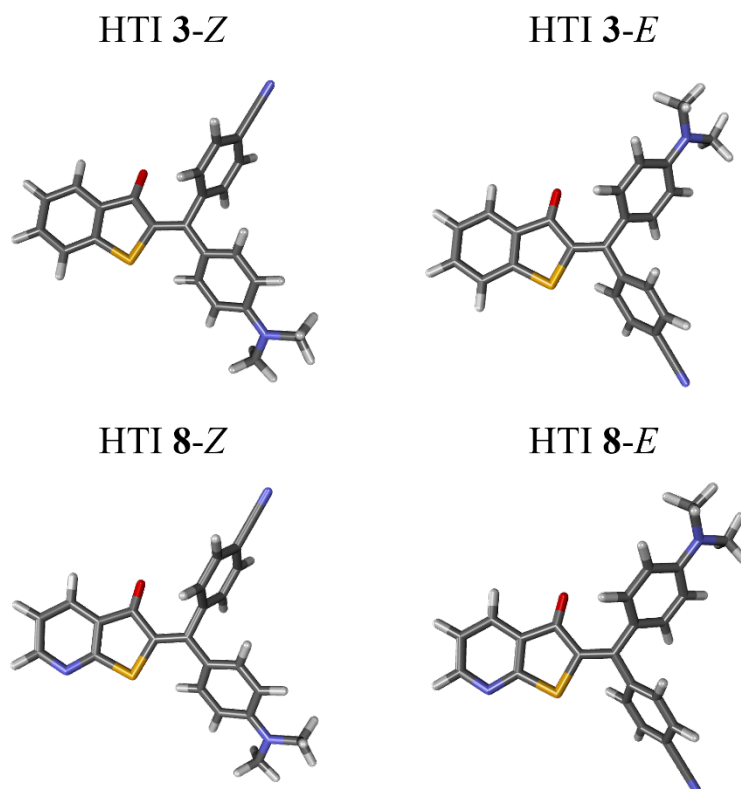

**Figure S38:** Theoretically obtained optimized molecular structures for the *Z*- and *E*-isomers of diaryl-HTIs **3** and **8** in toluene calculated on the B3LYP/6-311G(d,p) level of theory using the IEFPCM solvent model. Calculated  $\Delta G$  differences between the *E* and *Z* isomers, i.e.  $\Delta G_{E-Z}(\mathbf{3}) = 1.1$  kcal/mol and  $\Delta G_{E-Z}(\mathbf{8}) = 1.4$  kcal/mol, are in good agreement with the experimental values obtained at 40 °C and 30 °C, respectively.

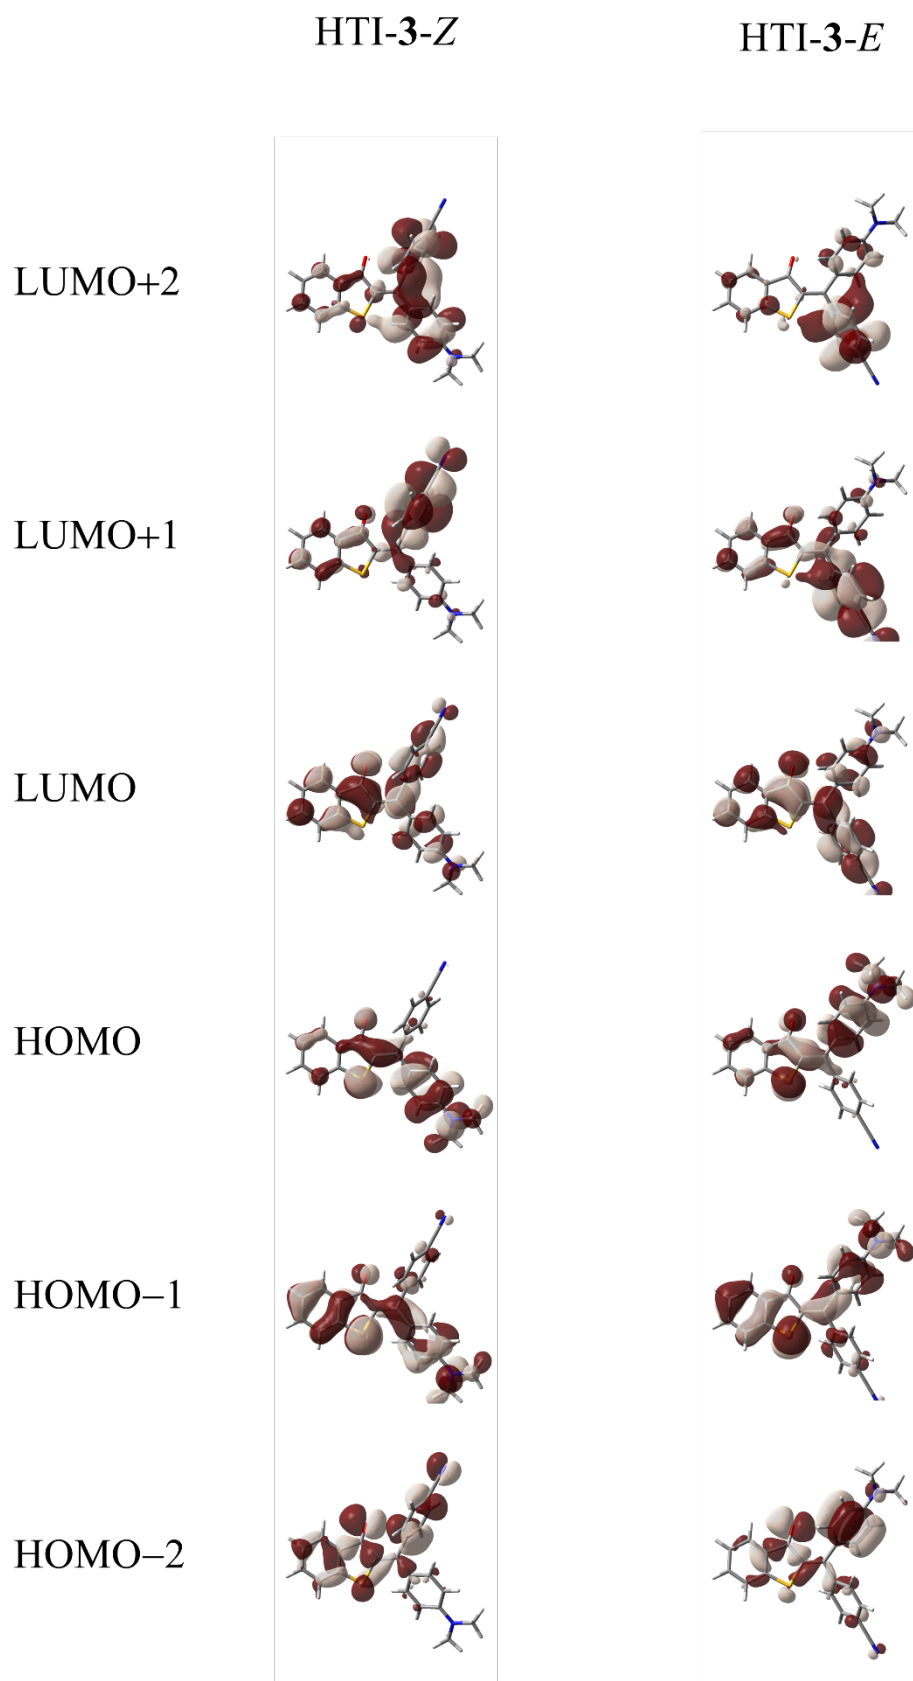

**Figure S39:** Theoretically obtained MOs for the Z- and E-isomer of diaryl-HTI **3** in toluene calculated on the B3LYP/6-311G(d,p) level of theory using the IEFPCM solvent model

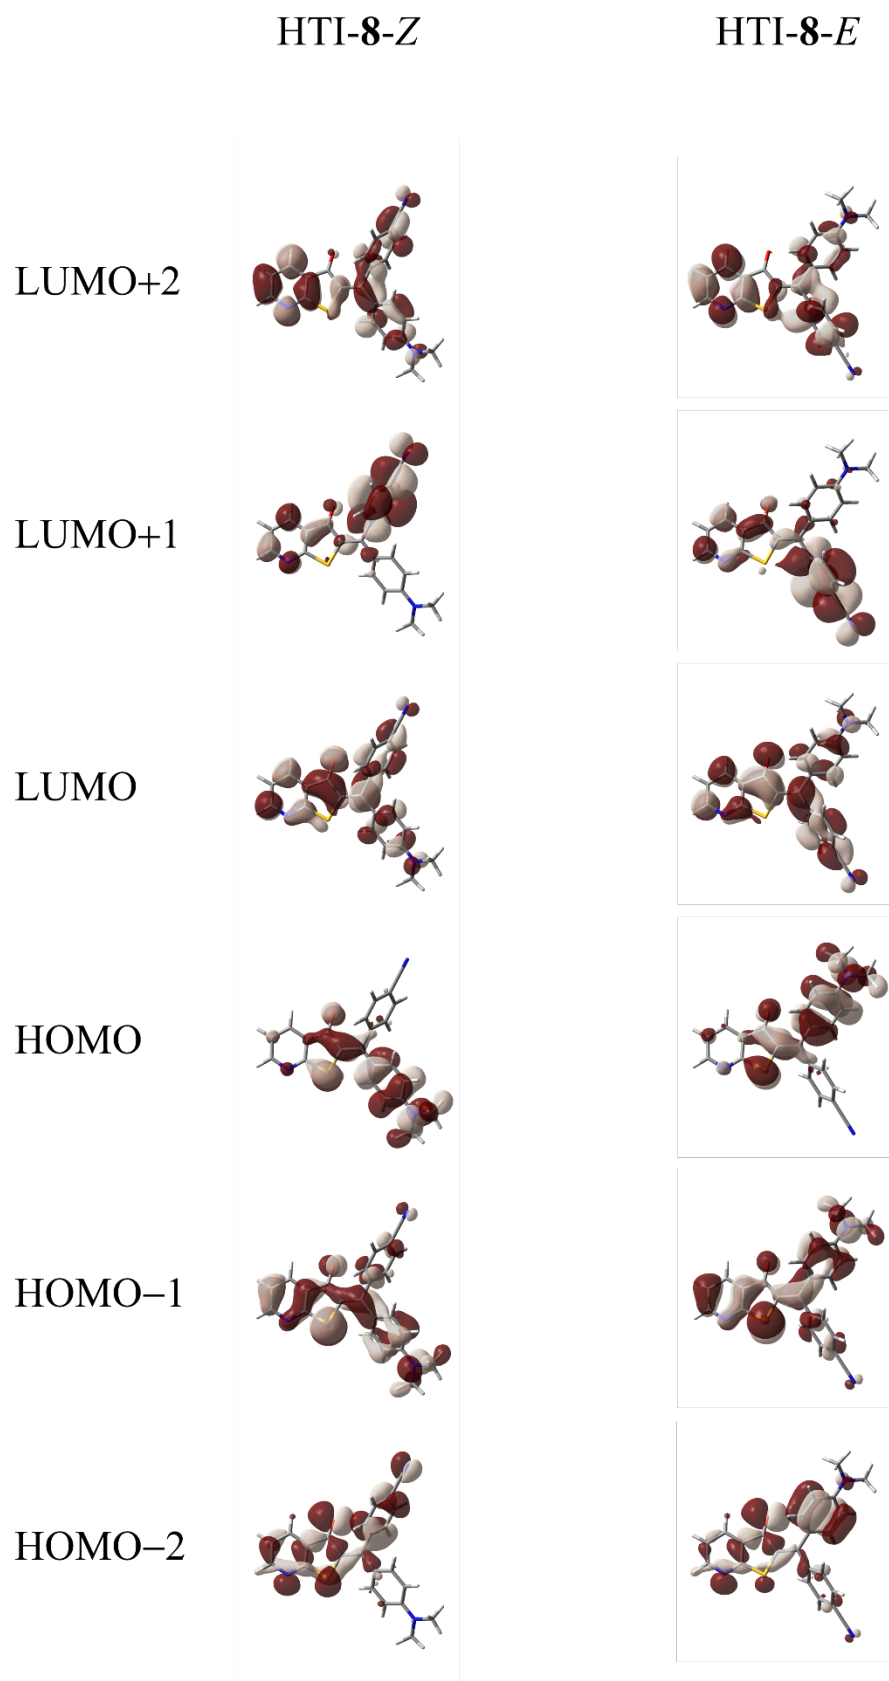

**Figure S40:** Theoretically obtained MOs for the Z- and E-isomer of diaryl-HTI **8** in toluene calculated on the B3LYP/6-311G(d,p) level of theory using the IEFPCM solvent model.

## 1D NOE NMR Spectra for Determination of Isomer Configuration

For elucidation of the double bond configuration of diaryl-HTIs 1D NOE NMR experiments were performed. Samples with 2-5 mg of substance were dissolved in deuterated solvents and the samples were irradiated with specific frequencies to observe through-space coupling from the aryl substituents to the benzothiophenone fragment of the diaryl-HTIs.

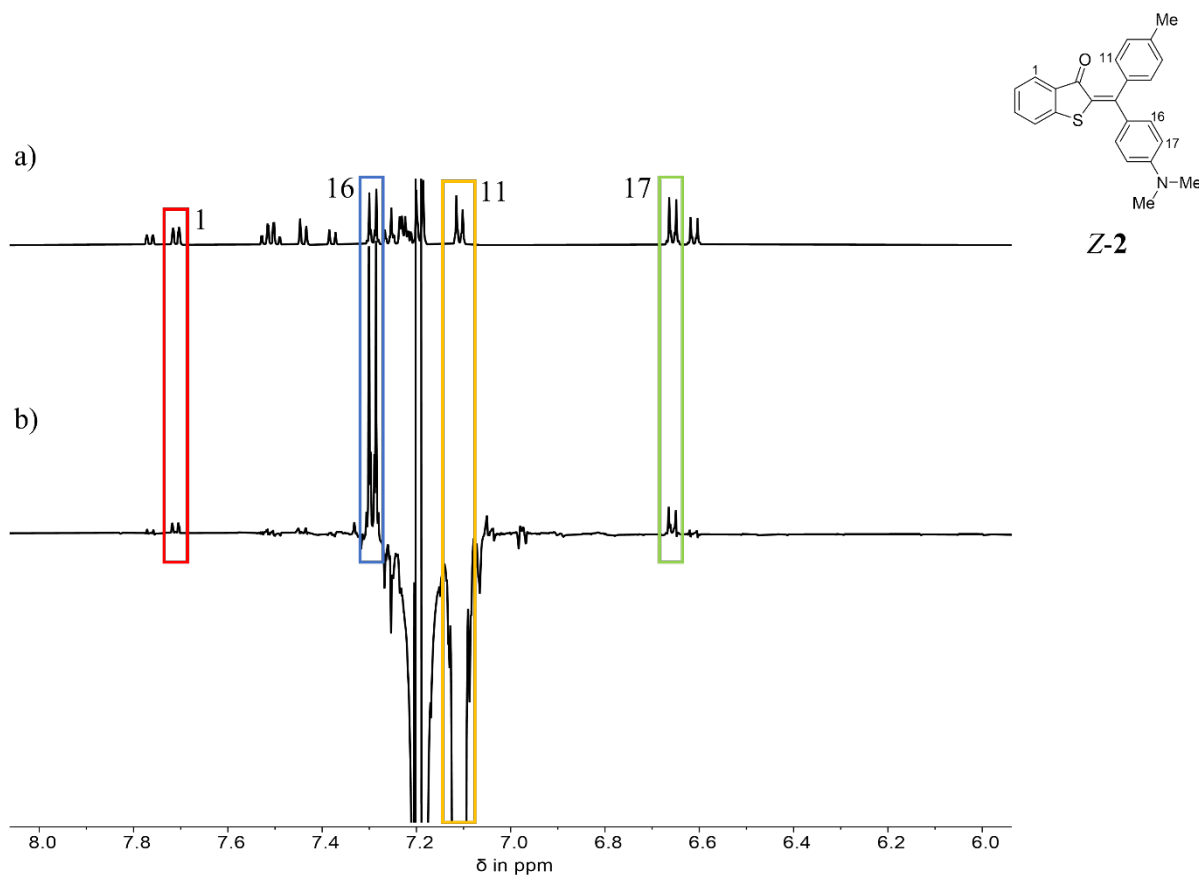

**Figure S41:** Aromatic region of the NMR spectra of diaryl-HTI **2** (mixture of *E* and *Z* isomer). Irradiation of the proton H(11) (yellow) leads to a through-space coupling to H(1) (red), H(16) (blue) and H(17) (green); a) <sup>1</sup>H NMR spectrum (601 MHz, CD<sub>2</sub>Cl<sub>2</sub>, 0°C); b) 1D NOE NMR spectrum (601 MHz, CD<sub>2</sub>Cl<sub>2</sub>, 0°C).

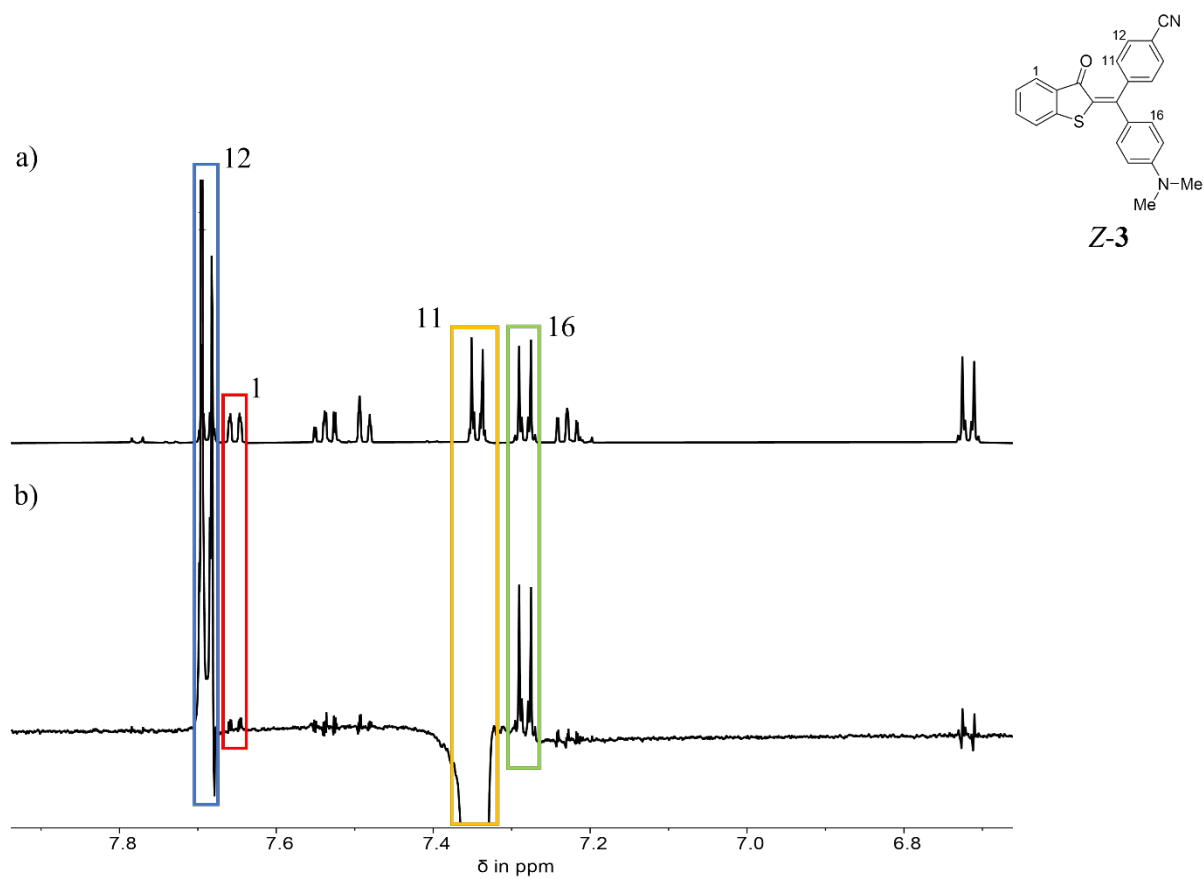

**Figure S42:** Aromatic region of the NMR spectra of diaryl-HTI **3** (mixture of *E* and *Z* isomer). Irradiation of the proton H(11) (yellow) leads to a trough-space coupling to H(1) (red), H(12) (blue) and H(16) (green); a)  $^1\text{H}$  NMR spectrum (601 MHz,  $\text{THF-}d_8$ ,  $25^\circ\text{C}$ ); b) 1D NOE NMR spectrum (601 MHz,  $\text{THF-}d_8$ ,  $25^\circ\text{C}$ ).

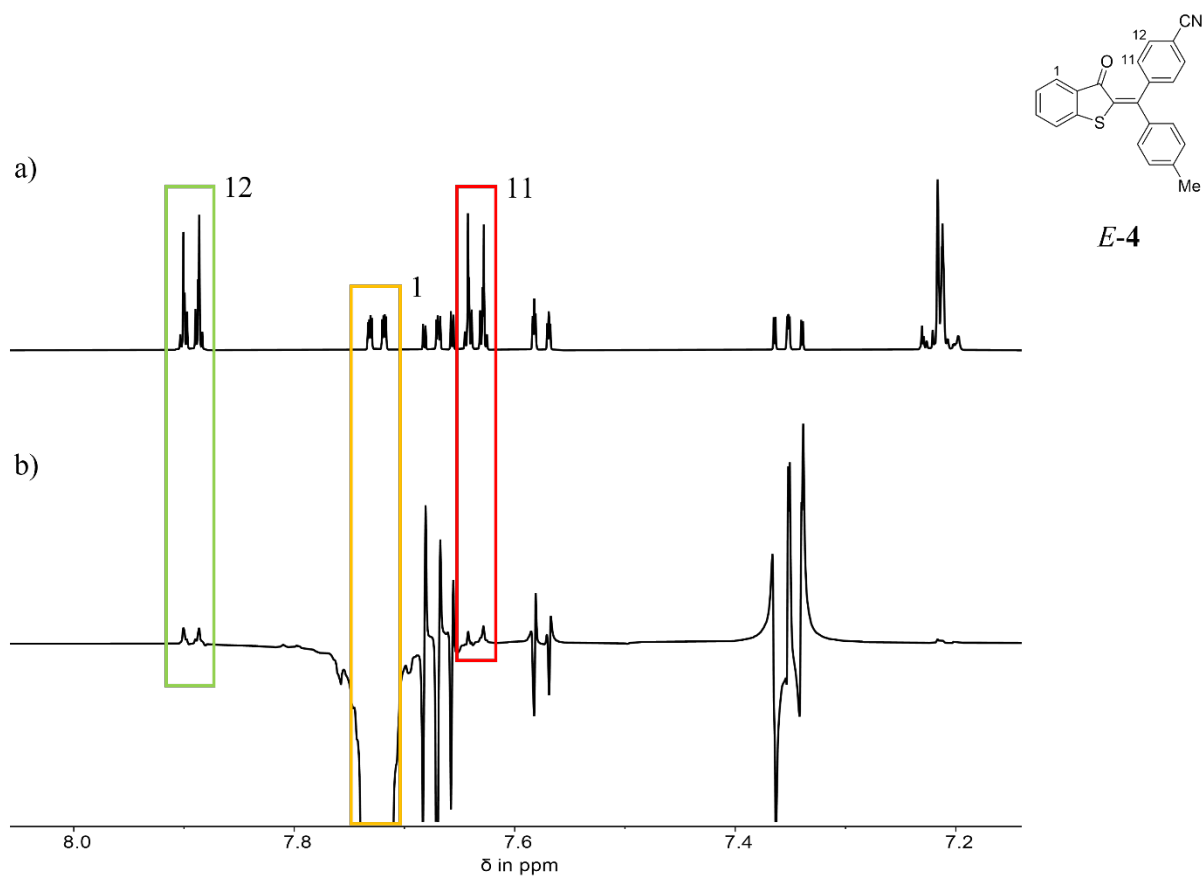

**Figure S43:** Aromatic region of the NMR spectra of diaryl-HTI **4** (*E*-isomer). Irradiation of the proton H(1) (yellow) leads to a trough-space coupling to H(11) (red) and H(12) (green); a)  $^1\text{H}$  NMR spectrum (601 MHz,  $(\text{CD}_3)_2\text{CO}$ , 25°C); b) 1D NOE NMR spectrum (601 MHz,  $(\text{CD}_3)_2\text{CO}$ , 25°C).

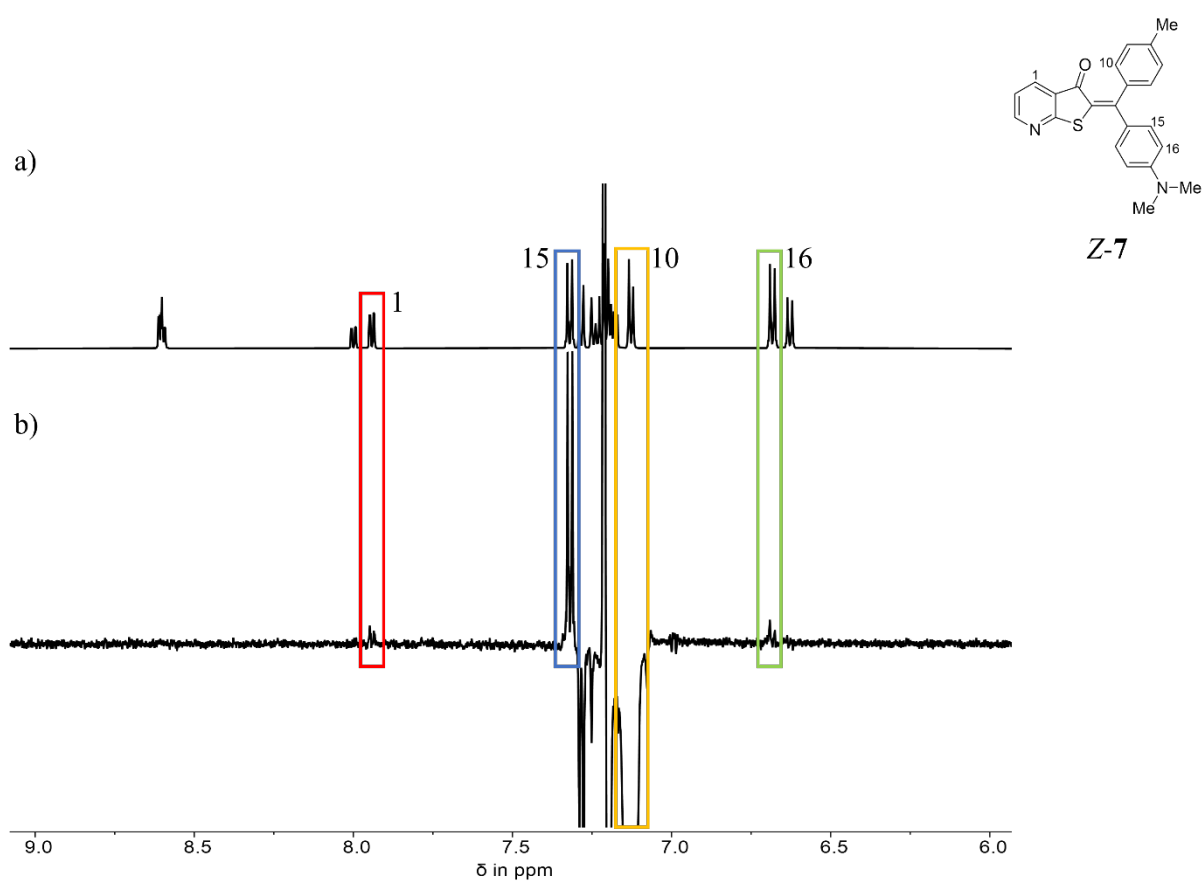

**Figure S44:** Aromatic region of the NMR spectra of diaryl-HTI 7 (mixture of *E* and *Z* isomer). Irradiation of the proton H(10) (yellow) leads to a trough-space coupling to H(1) (red), H(15) (blue) and H(16) (green); a)  $^1\text{H}$  NMR spectrum (601 MHz,  $\text{CD}_2\text{Cl}_2$ , 25°C); b) 1D NOE NMR spectrum (601 MHz,  $\text{CD}_2\text{Cl}_2$ , 25°C).

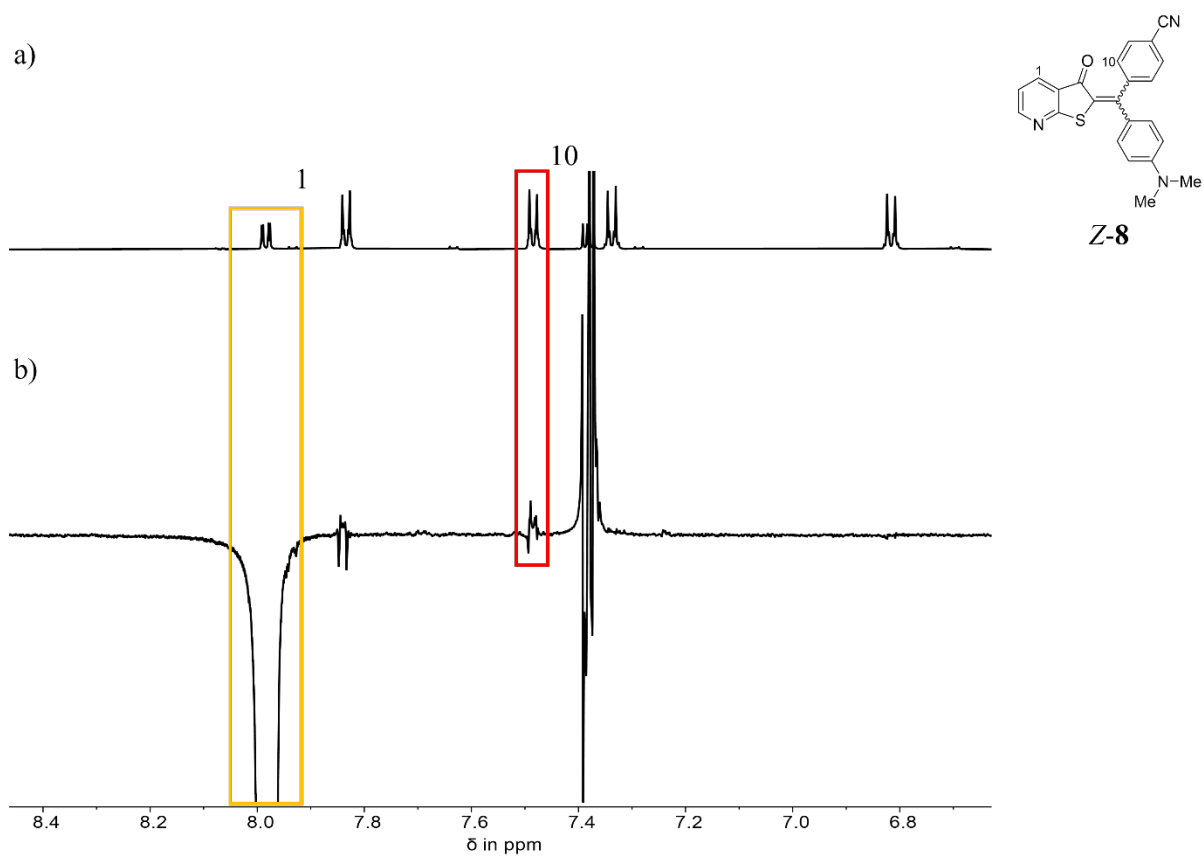

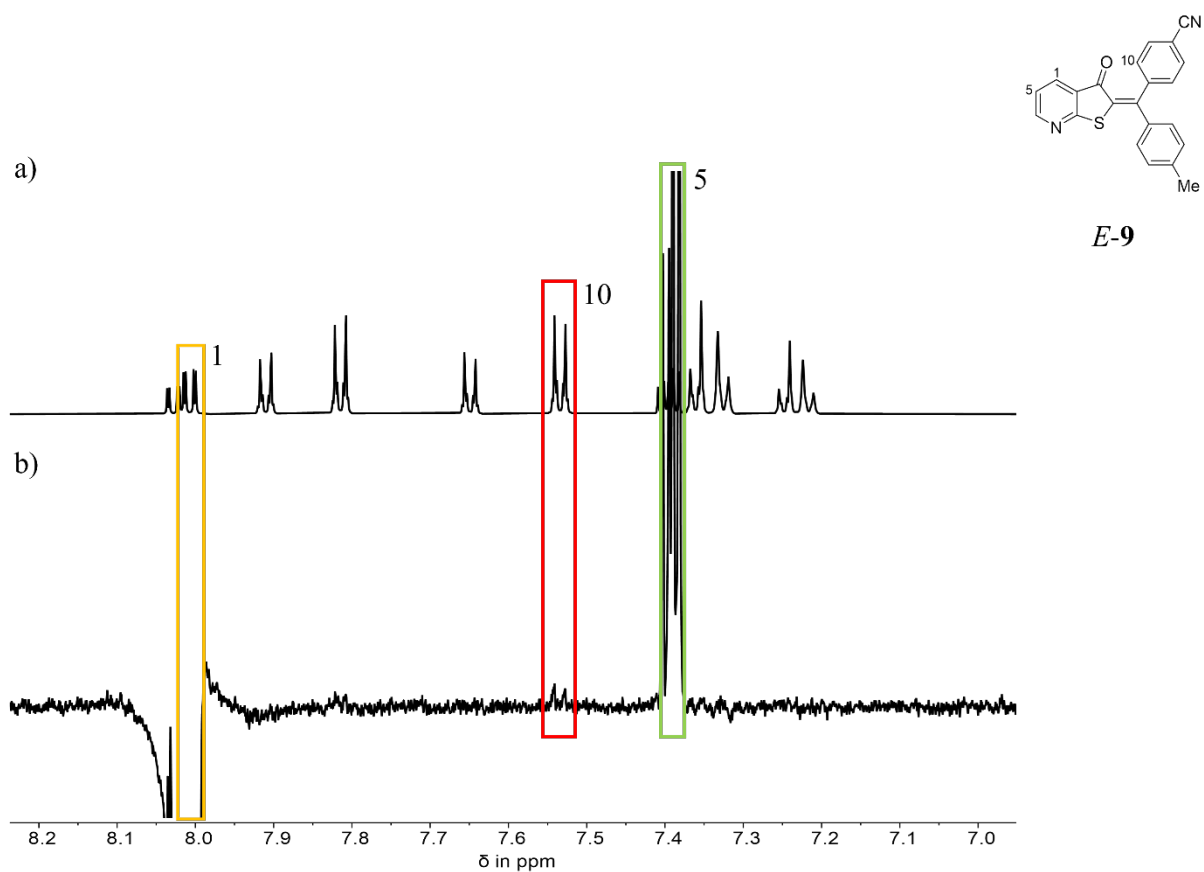

**Figure S46:** Aromatic region of the NMR spectra of diaryl-HTI **9** (mixture of *E* and *Z* isomer). Irradiation of the proton H(1) (yellow) leads to a trough-space coupling to H(10) (red) and H(5) (green); a)  $^1\text{H}$  NMR spectrum (601 MHz,  $(\text{CD}_3)_2\text{CO}$ , 25°C); b) 1D NOE NMR spectrum (601 MHz,  $(\text{CD}_3)_2\text{CO}$ , 25°C).

## Crystal Structural Data

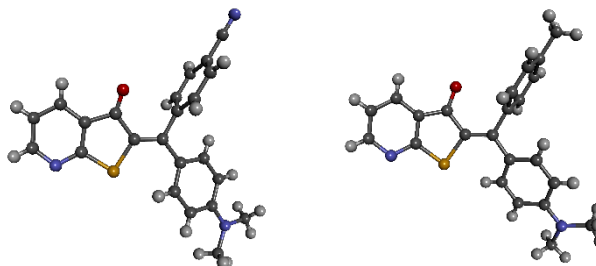

| Compound                     | Diaryl-HTI 8<br>CCDC 2227018                      | Diaryl-HTI 7<br>CCDC 2227017                      |
|------------------------------|---------------------------------------------------|---------------------------------------------------|
| Formula                      | C <sub>23</sub> H <sub>17</sub> N <sub>3</sub> OS | C <sub>23</sub> H <sub>20</sub> N <sub>2</sub> OS |
| $D_{calc.}/\text{g cm}^{-3}$ | 1.333                                             | 1.286                                             |
| $\mu/\text{mm}^{-1}$         | 1.648                                             | 1.601                                             |
| Formula Weight               | 383.45                                            | 372.47                                            |
| Colour                       | light red                                         | clear reddish red                                 |
| Shape                        | plate-shaped                                      | plate-shaped                                      |
| Size/mm <sup>3</sup>         | 0.33×0.31×0.08                                    | 0.24×0.12×0.10                                    |
| $T/\text{K}$                 | 153(1)                                            | 153.00(10)                                        |
| Crystal System               | orthorhombic                                      | monoclinic                                        |
| Flack Parameter              | 0.03(2)                                           | 0.14(7)                                           |
| Hooft Parameter              | 0.024(15)                                         | 0.16(2)                                           |
| Space Group                  | $P2_12_12_1$                                      | $P2_1$                                            |
| $a/\text{\AA}$               | 7.1543(2)                                         | 5.5494(8)                                         |
| $b/\text{\AA}$               | 11.4783(4)                                        | 12.9584(18)                                       |
| $c/\text{\AA}$               | 23.2717(9)                                        | 13.437(2)                                         |
| $\alpha/^\circ$              | 90                                                | 90                                                |
| $\beta/^\circ$               | 90                                                | 95.222(13)                                        |
| $\gamma/^\circ$              | 90                                                | 90                                                |
| $V/\text{\AA}^3$             | 1911.05(11)                                       | 962.3(2)                                          |
| $Z$                          | 4                                                 | 2                                                 |
| $Z'$                         | 1                                                 | 1                                                 |
| Wavelength/ $\text{\AA}$     | 1.54184                                           | 1.54184                                           |
| Radiation type               | Cu $K_\alpha$                                     | Cu $K_\alpha$                                     |
| $\theta_{min}/^\circ$        | 3.799                                             | 3.303                                             |
| $\theta_{max}/^\circ$        | 72.180                                            | 71.330                                            |
| Measured Refl's.             | 6676                                              | 6457                                              |
| Indep't Refl's               | 3658                                              | 3595                                              |
| Refl's $I \geq 2 \sigma(I)$  | 3376                                              | 2974                                              |
| $R_{int}$                    | 0.0347                                            | 0.0532                                            |
| Parameters                   | 255                                               | 259                                               |
| Restraints                   | 0                                                 | 3                                                 |
| Largest Peak                 | 0.390                                             | 0.238                                             |
| Deepest Hole                 | -0.449                                            | -0.230                                            |
| GooF                         | 1.065                                             | 1.087                                             |
| $wR_2$ (all data)            | 0.1355                                            | 0.2346                                            |
| $wR_2$                       | 0.1307                                            | 0.2222                                            |
| $R_1$ (all data)             | 0.0535                                            | 0.0930                                            |
| $R_1$                        | 0.0493                                            | 0.0816                                            |

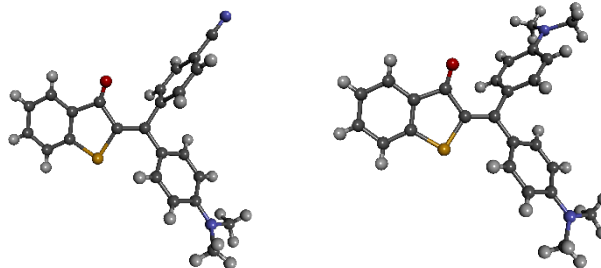

| Compound                     | Diaryl-HTI 3<br>CCDC 2227015                      | Diaryl-HTI 1<br>CCDC 2227014                      |
|------------------------------|---------------------------------------------------|---------------------------------------------------|
| Formula                      | C <sub>24</sub> H <sub>18</sub> N <sub>2</sub> OS | C <sub>25</sub> H <sub>24</sub> N <sub>2</sub> OS |
| $D_{calc.}/\text{g cm}^{-3}$ | 1.309                                             | 1.297                                             |
| $\mu/\text{mm}^{-1}$         | 1.605                                             | 1.537                                             |
| Formula Weight               | 382.46                                            | 400.52                                            |
| Colour                       | clear light red                                   | clear reddish red                                 |
| Shape                        | block-shaped                                      | needle-shaped                                     |
| Size/mm <sup>3</sup>         | 0.23×0.20×0.10                                    | 0.25×0.05×0.05                                    |
| $T/\text{K}$                 | 154(4)                                            | 152.95(10)                                        |
| Crystal System               | monoclinic                                        | monoclinic                                        |
| Space Group                  | $P2_1/n$                                          | $P2_1/c$                                          |
| $a/\text{\AA}$               | 8.7409(2)                                         | 9.9704(8)                                         |
| $b/\text{\AA}$               | 13.9118(3)                                        | 21.4506(10)                                       |
| $c/\text{\AA}$               | 15.9596(4)                                        | 9.7628(5)                                         |
| $\alpha^\circ$               | 90                                                | 90                                                |
| $\beta^\circ$                | 89.742(2)                                         | 100.735(6)                                        |
| $\gamma^\circ$               | 90                                                | 90                                                |
| $V/\text{\AA}^3$             | 1940.69(8)                                        | 2051.4(2)                                         |
| $Z$                          | 4                                                 | 4                                                 |
| $Z'$                         | 1                                                 | 1                                                 |
| Wavelength/ $\text{\AA}$     | 1.54184                                           | 1.54184                                           |
| Radiation type               | Cu K $\alpha$                                     | Cu K $\alpha$                                     |
| $\theta_{min}/^\circ$        | 4.216                                             | 4.514                                             |
| $\theta_{max}/^\circ$        | 71.634                                            | 69.260                                            |
| Measured Refl's.             | 6519                                              | 6287                                              |
| Indep't Refl's               | 3641                                              | 3658                                              |
| Refl's $I \geq 2 \sigma(I)$  | 3397                                              | 3060                                              |
| $R_{int}$                    | 0.0215                                            | 0.0275                                            |
| Parameters                   | 255                                               | 266                                               |
| Restraints                   | 0                                                 | 0                                                 |
| Largest Peak                 | 0.870                                             | 0.602                                             |
| Deepest Hole                 | -0.678                                            | -0.495                                            |
| GooF                         | 1.025                                             | 1.049                                             |
| $wR_2$ (all data)            | 0.1445                                            | 0.1891                                            |
| $wR_2$                       | 0.1416                                            | 0.1780                                            |
| $R_1$ (all data)             | 0.0557                                            | 0.0789                                            |
| $R_1$                        | 0.0530                                            | 0.0677                                            |

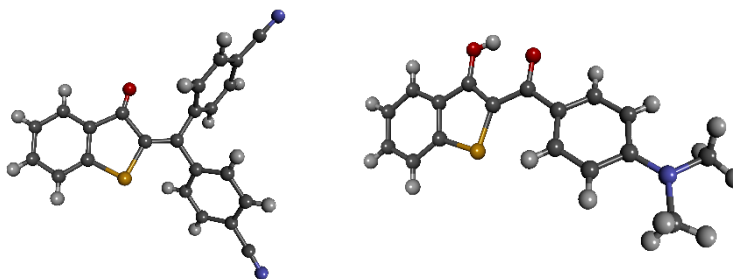

| Compound                     | Diaryl-HTI 5<br>CCDC 2227016                      | Compound 15<br>CCDC 2227451                       |
|------------------------------|---------------------------------------------------|---------------------------------------------------|
| Formula                      | C <sub>23</sub> H <sub>12</sub> N <sub>2</sub> OS | C <sub>17</sub> H <sub>15</sub> NO <sub>2</sub> S |
| $D_{calc.}/\text{g cm}^{-3}$ | 1.351                                             | 1.391                                             |
| $\mu/\text{mm}^{-1}$         | 1.718                                             | 2.053                                             |
| Formula Weight               | 364.41                                            | 297.36                                            |
| Colour                       | clear light orange                                | clear light yellow                                |
| Shape                        | block-shaped                                      | block-shaped                                      |
| Size/mm <sup>3</sup>         | 0.41×0.33×0.27                                    | 0.26×0.21×0.16                                    |
| $T/\text{K}$                 | 153.00(10)                                        | 153.00(10)                                        |
| Crystal System               | monoclinic                                        | monoclinic                                        |
| Space Group                  | $P2_1/n$                                          | $P2_1/c$                                          |
| $a/\text{\AA}$               | 12.1913(2)                                        | 15.6601(2)                                        |
| $b/\text{\AA}$               | 22.6255(3)                                        | 7.17100(10)                                       |
| $c/\text{\AA}$               | 13.0947(2)                                        | 12.72030(10)                                      |
| $\alpha^\circ$               | 90                                                | 90                                                |
| $\beta^\circ$                | 97.3090(10)                                       | 96.1630(10)                                       |
| $\gamma^\circ$               | 90                                                | 90                                                |
| $V/\text{\AA}^3$             | 3582.62(9)                                        | 1420.22(3)                                        |
| $Z$                          | 8                                                 | 4                                                 |
| $Z'$                         | 2                                                 | 1                                                 |
| Wavelength/ $\text{\AA}$     | 1.54184                                           | 1.54184                                           |
| Radiation type               | Cu K $\alpha$                                     | Cu K $\alpha$                                     |
| $\theta_{min}/^\circ$        | 3.924                                             | 2.838                                             |
| $\theta_{max}/^\circ$        | 73.191                                            | 71.537                                            |
| Measured Refl's.             | 13496                                             | 8644                                              |
| Indep't Refl's               | 6961                                              | 2717                                              |
| Refl's $I \geq 2 \sigma(I)$  | 6064                                              | 2611                                              |
| $R_{int}$                    | 0.0276                                            | 0.0191                                            |
| Parameters                   | 488                                               | 194                                               |
| Restraints                   | 0                                                 | 0                                                 |
| Largest Peak                 | 0.709                                             | 0.284                                             |
| Deepest Hole                 | -0.571                                            | -0.203                                            |
| GooF                         | 1.020                                             | 1.068                                             |
| $wR_2$ (all data)            | 0.1164                                            | 0.0850                                            |
| $wR_2$                       | 0.1111                                            | 0.0842                                            |
| $R_1$ (all data)             | 0.0513                                            | 0.0309                                            |
| $R_1$                        | 0.0446                                            | 0.0301                                            |

## NMR spectra

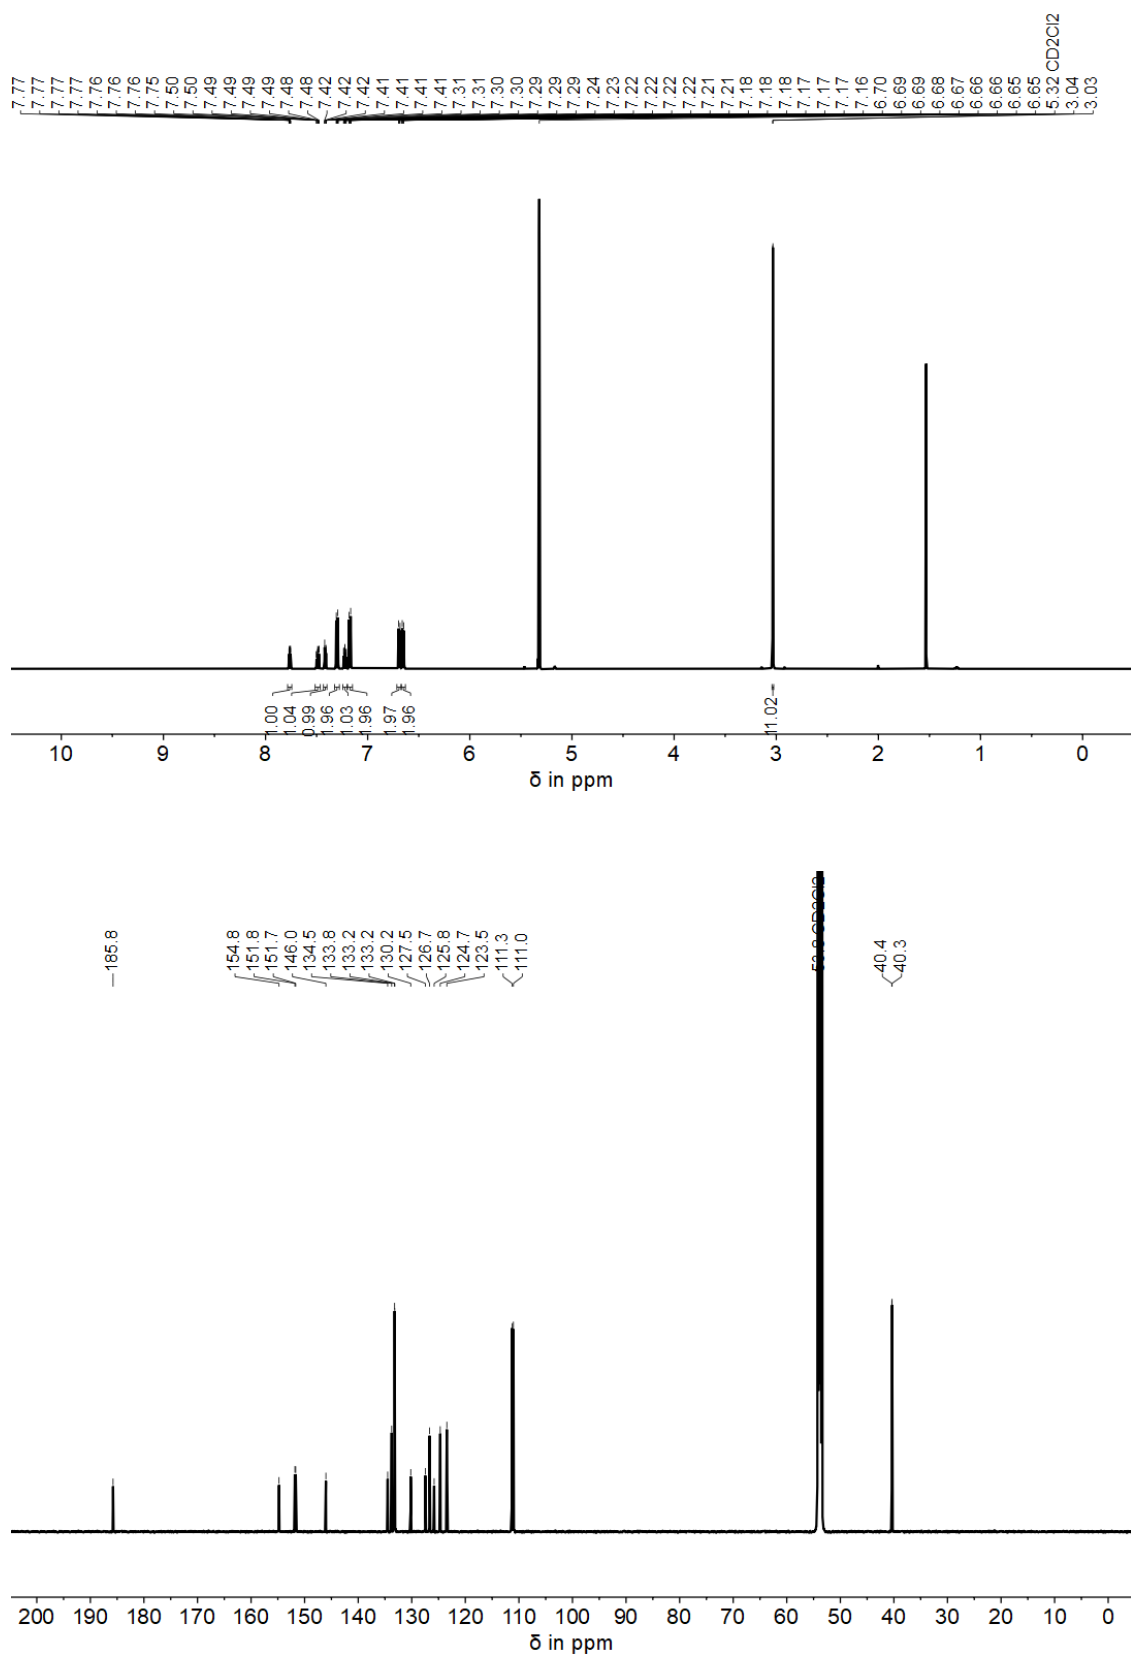

**Figure S47:** NMR spectra of diaryl-HTI 1;  $^1\text{H}$  NMR spectrum (601 MHz,  $\text{CD}_2\text{Cl}_2$ , 23 °C) (top);  $^{13}\text{C}$  NMR spectrum (151 MHz,  $\text{CD}_2\text{Cl}_2$ , 23 °C) (bottom).



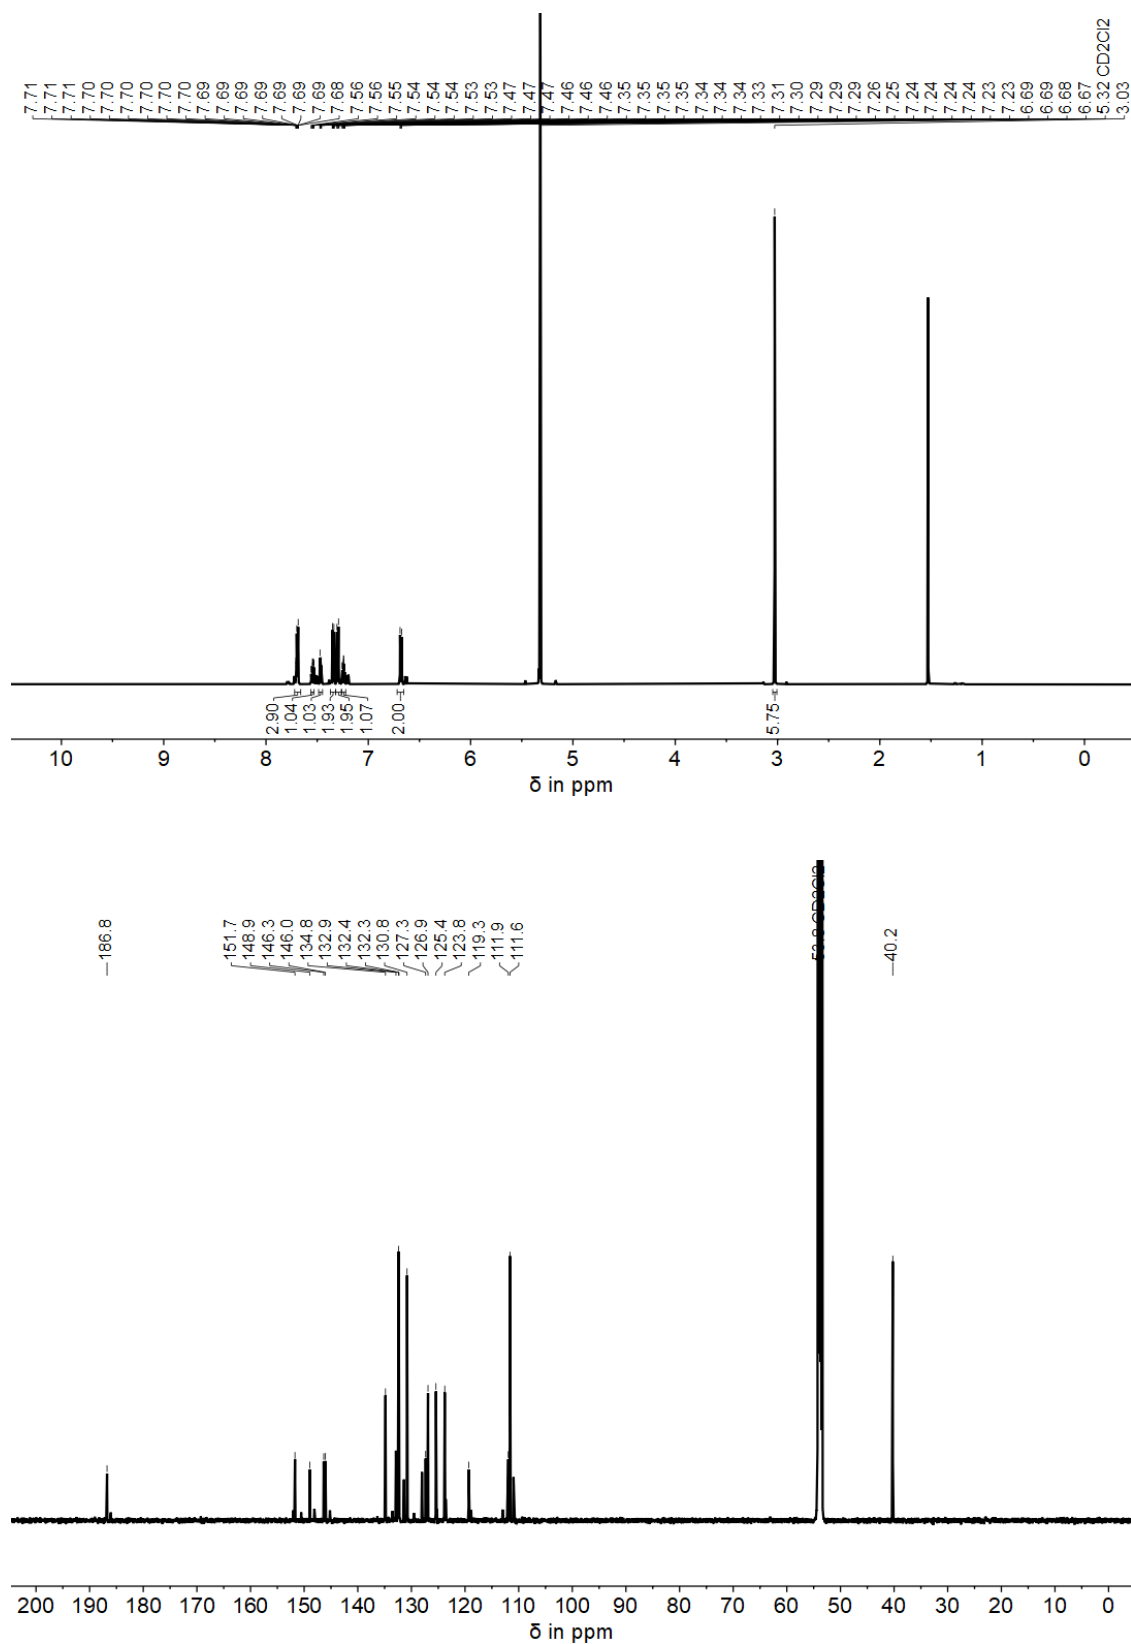

**Figure S49:** NMR spectra of diaryl-HTI **3** (mixture of *E* and *Z* isomer);  $^1\text{H}$  NMR spectrum (601 MHz,  $\text{CD}_2\text{Cl}_2$ , 23  $^\circ\text{C}$ ) (top);  $^{13}\text{C}$  NMR spectrum (151 MHz,  $\text{CD}_2\text{Cl}_2$ , 23  $^\circ\text{C}$ ) (bottom).

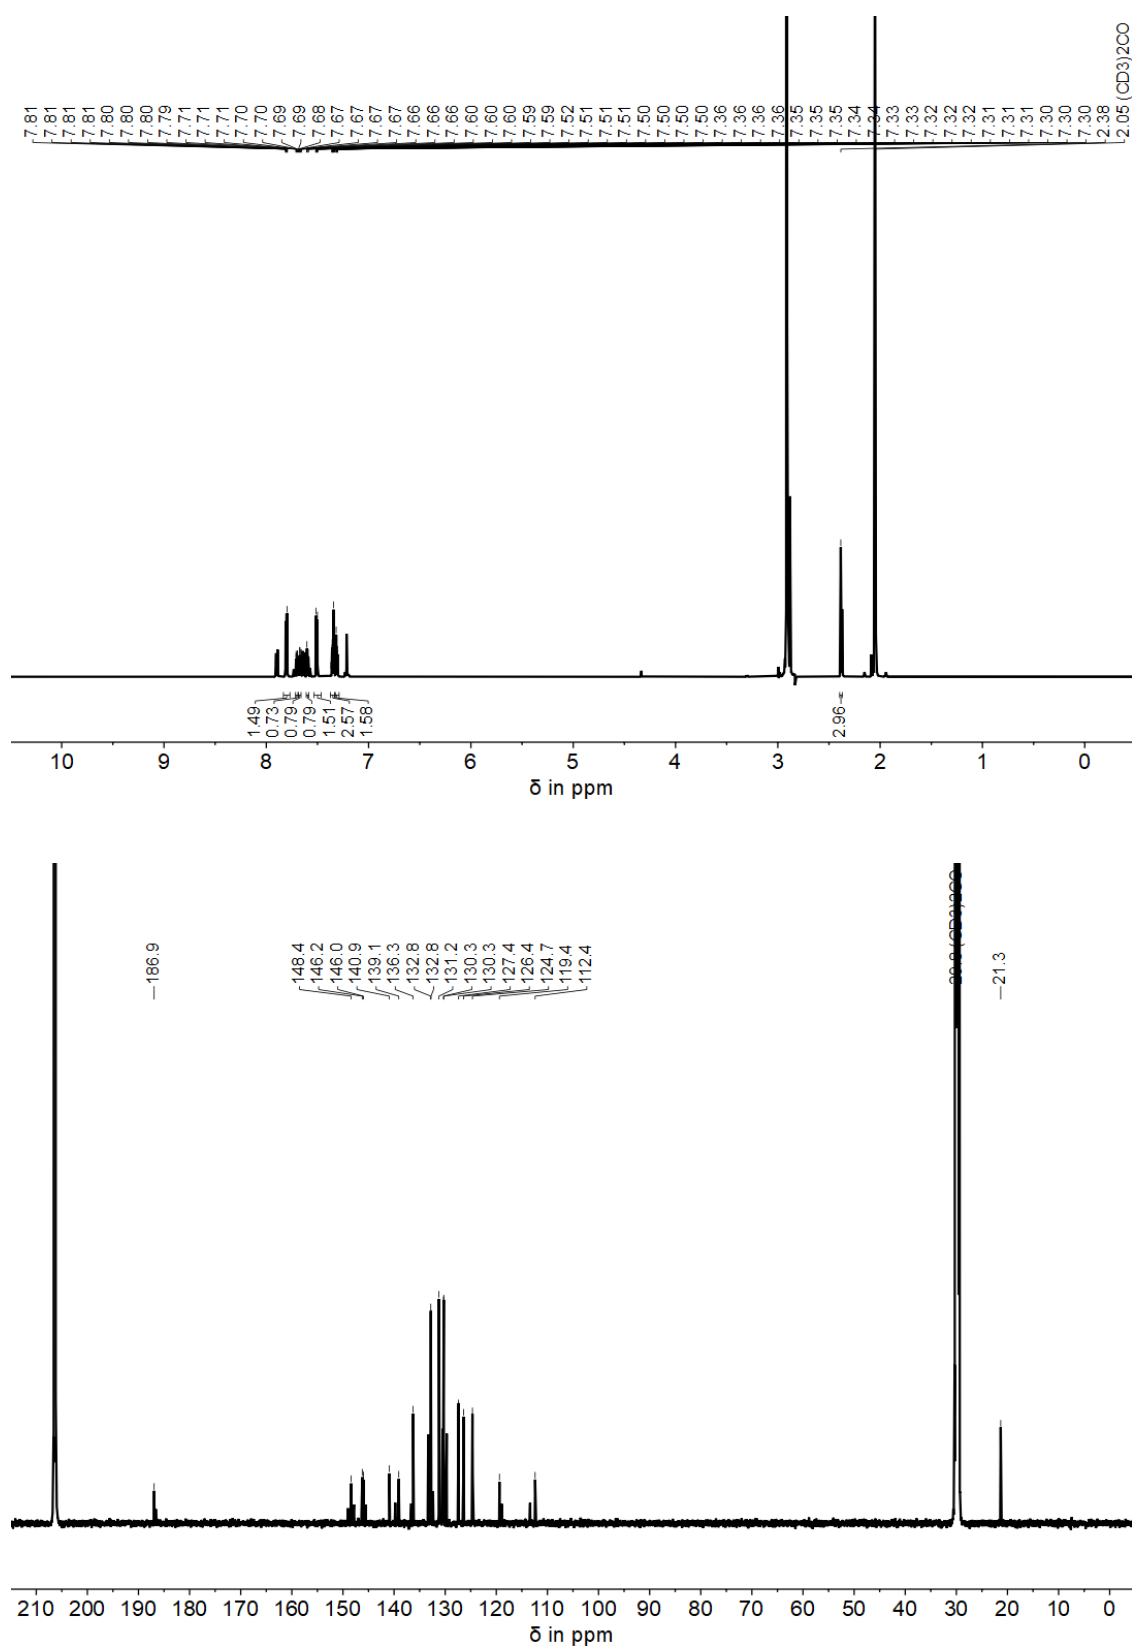

**Figure S50:** NMR spectra of diaryl-HTI **4** (mixture of *E* and *Z* isomer); <sup>1</sup>H NMR spectrum (601 MHz, (CD<sub>3</sub>)<sub>2</sub>CO, 23 °C) (top); <sup>13</sup>C NMR spectrum (151 MHz, (CD<sub>3</sub>)<sub>2</sub>CO, 23 °C) (bottom).

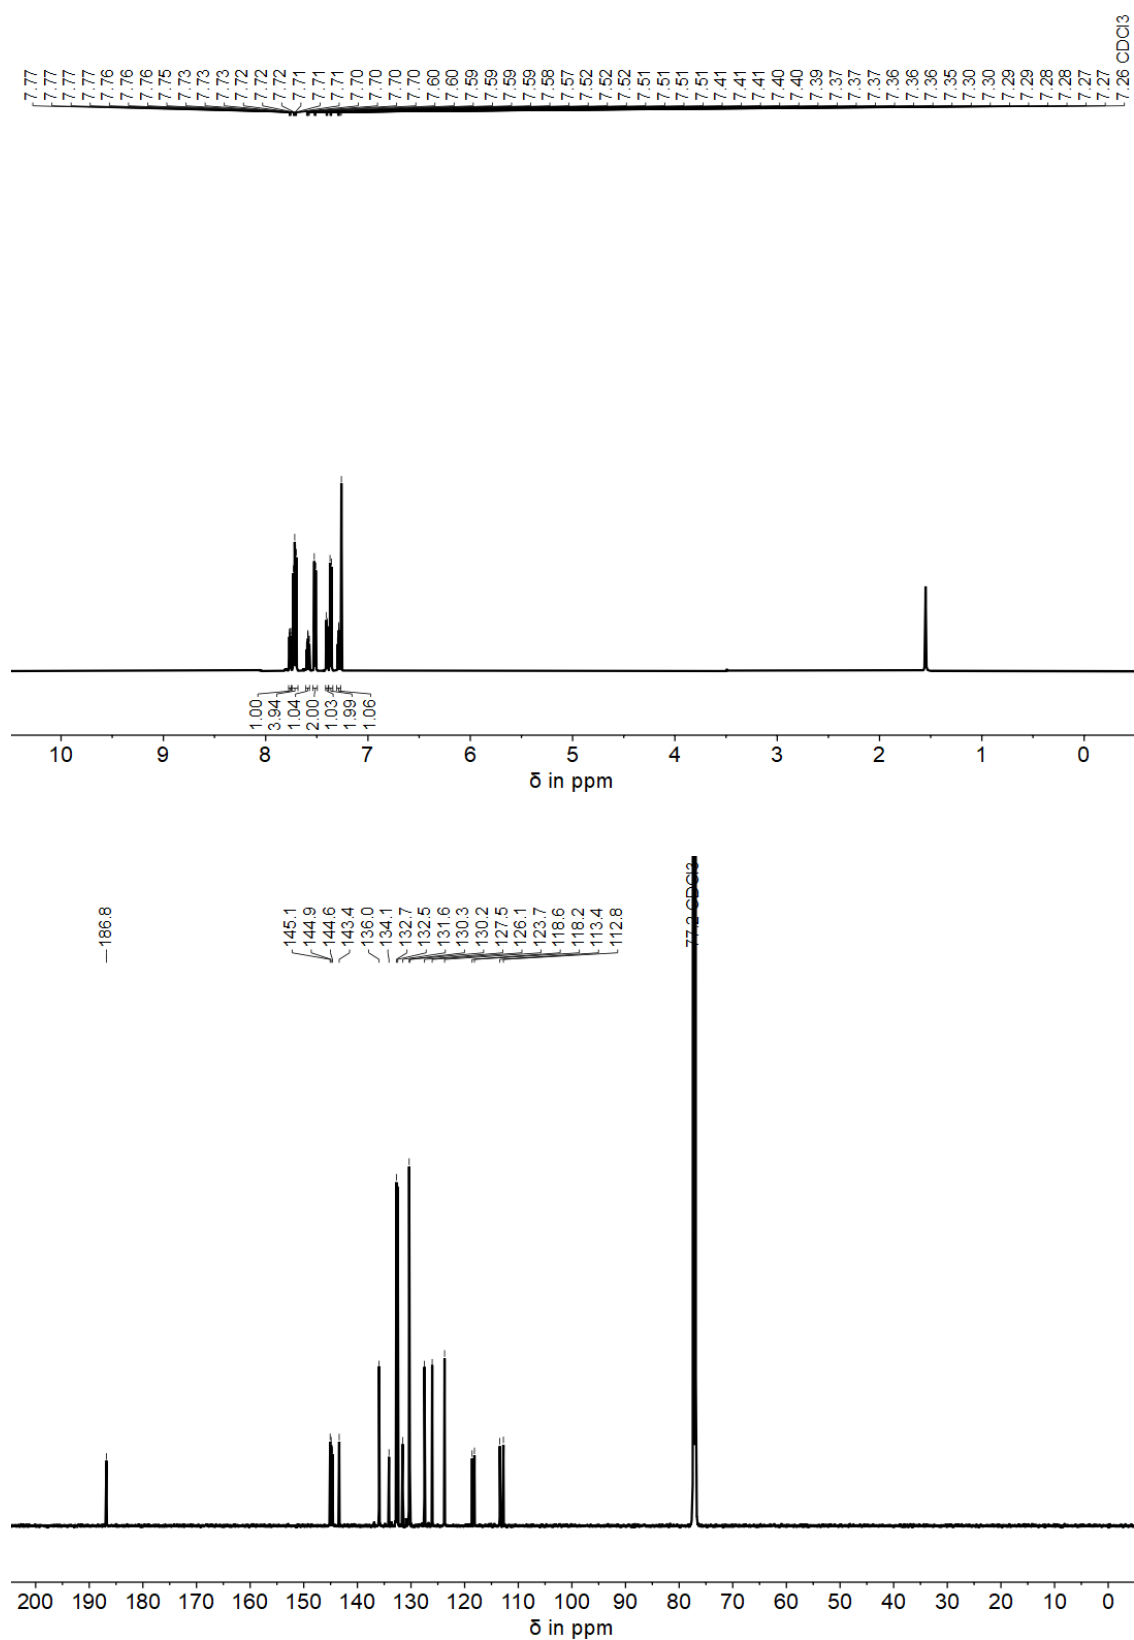

**Figure S51:** NMR spectra of diaryl-HTI **5**; <sup>1</sup>H NMR spectrum (601 MHz, CDCl<sub>3</sub>, 23 °C) (top); <sup>13</sup>C NMR spectrum (151 MHz, CDCl<sub>3</sub>, 23 °C) (bottom).

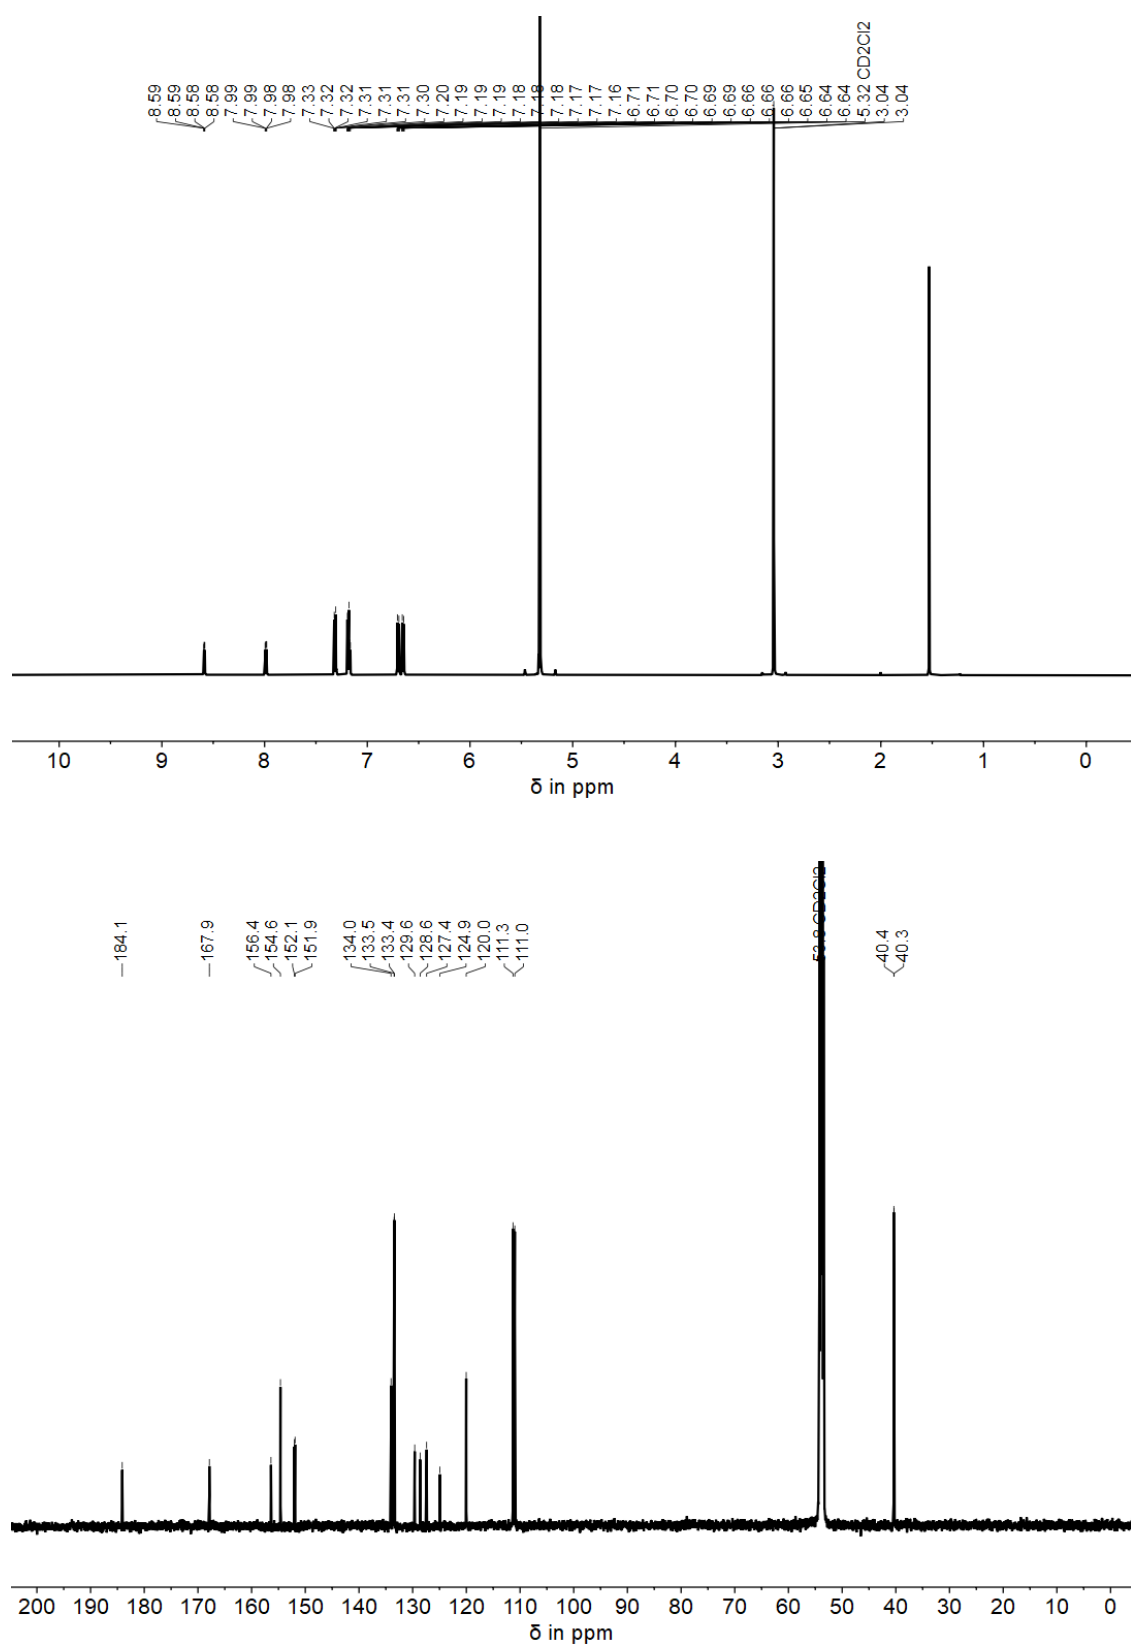

**Figure S52:** NMR spectra of diaryl-HTI **6**;  $^1\text{H}$  NMR spectrum (601 MHz,  $\text{CD}_2\text{Cl}_2$ , 23  $^\circ\text{C}$ ) (top);  $^{13}\text{C}$  NMR spectrum (151 MHz,  $\text{CD}_2\text{Cl}_2$ , 23  $^\circ\text{C}$ ) (bottom).

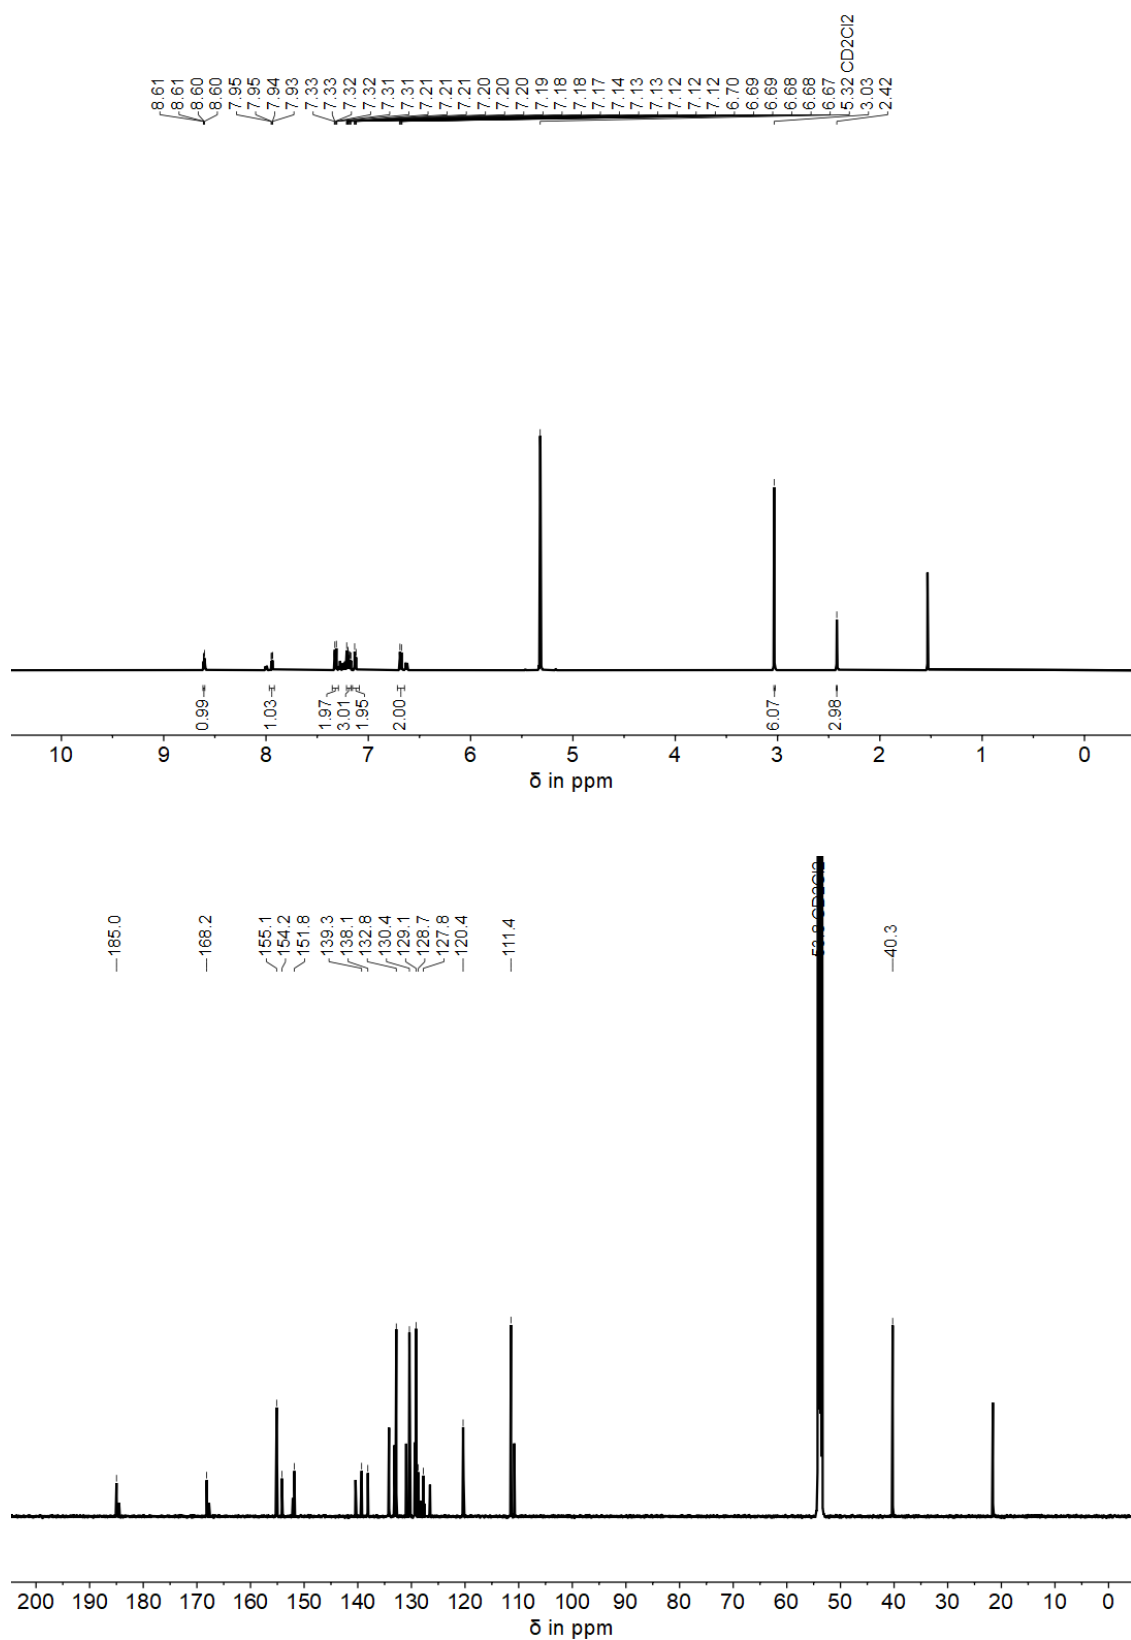

**Figure S53:** NMR spectra of diaryl-HTI **7** (mixture of *E* and *Z* isomer); <sup>1</sup>H NMR spectrum (601 MHz, CD<sub>2</sub>Cl<sub>2</sub>, 23 °C) (top); <sup>13</sup>C NMR spectrum (151 MHz, CD<sub>2</sub>Cl<sub>2</sub>, 23 °C) (bottom).

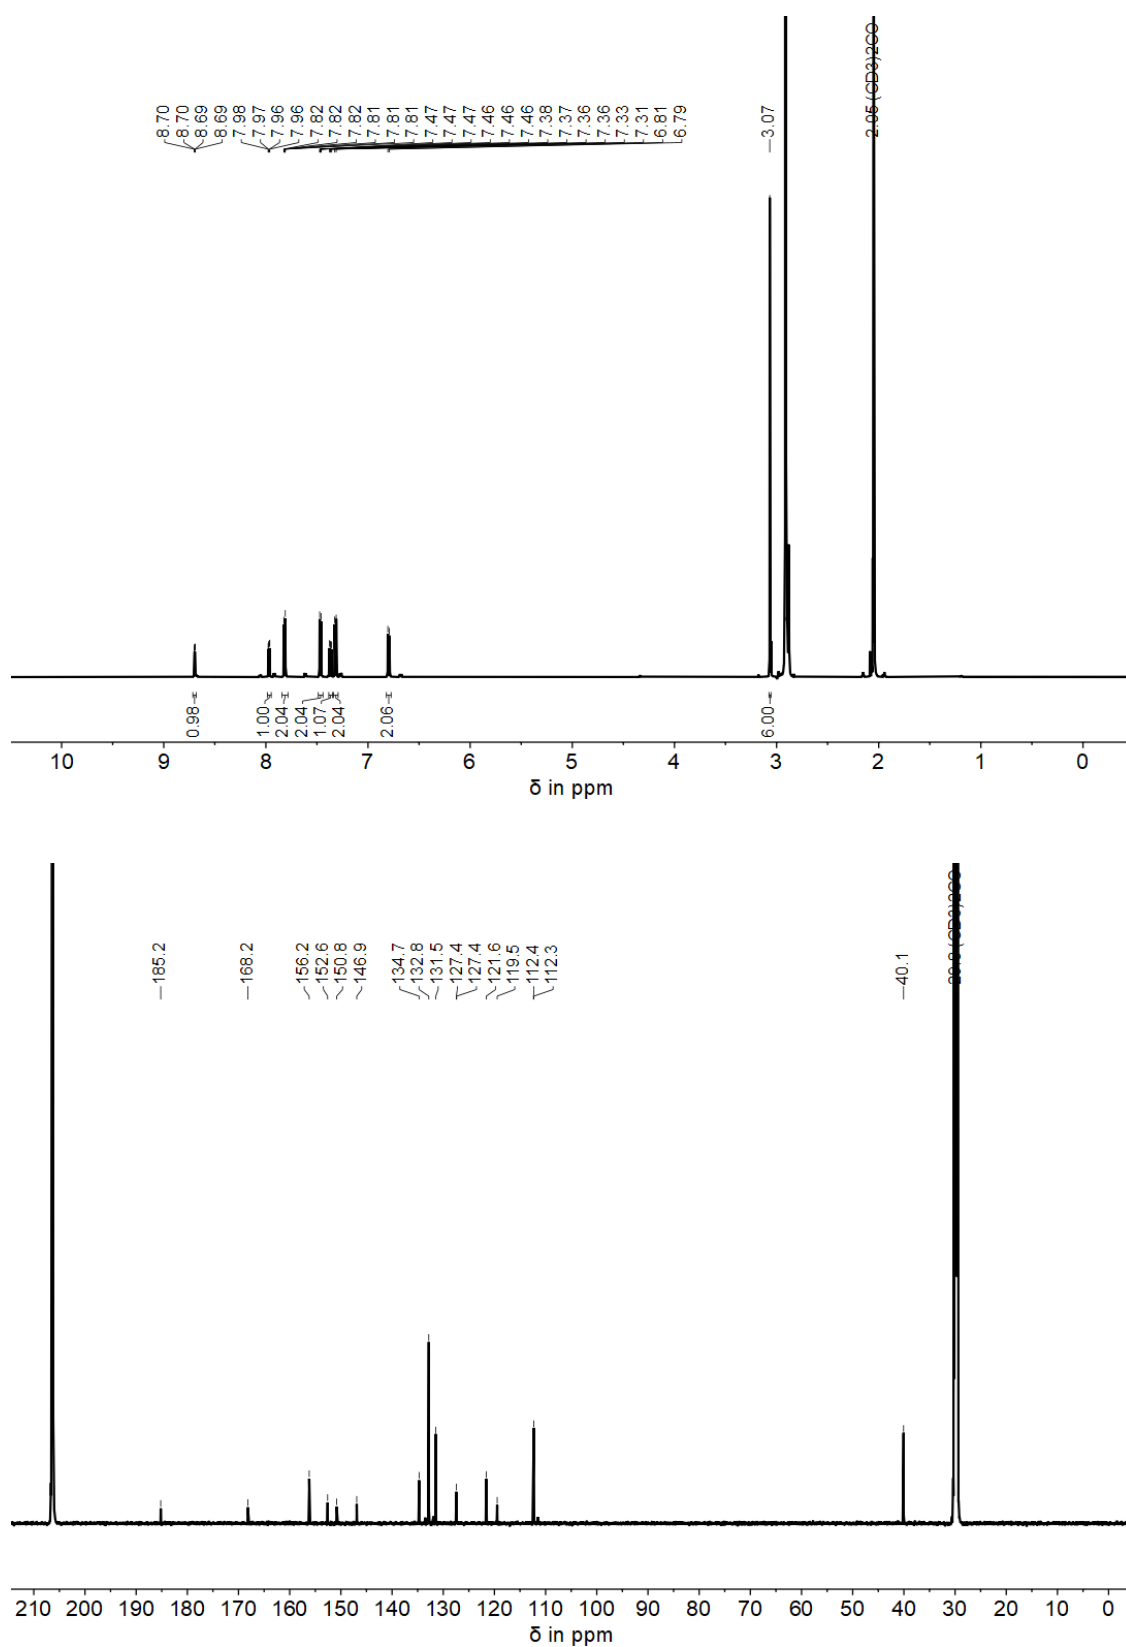

**Figure S54:** NMR spectra of diaryl-HTI **8** (mixture of *E* and *Z* isomer); <sup>1</sup>H NMR spectrum (601 MHz, (CD<sub>3</sub>)<sub>2</sub>CO, 23 °C) (top); <sup>13</sup>C NMR spectrum (151 MHz, (CD<sub>3</sub>)<sub>2</sub>CO, 23 °C) (bottom).

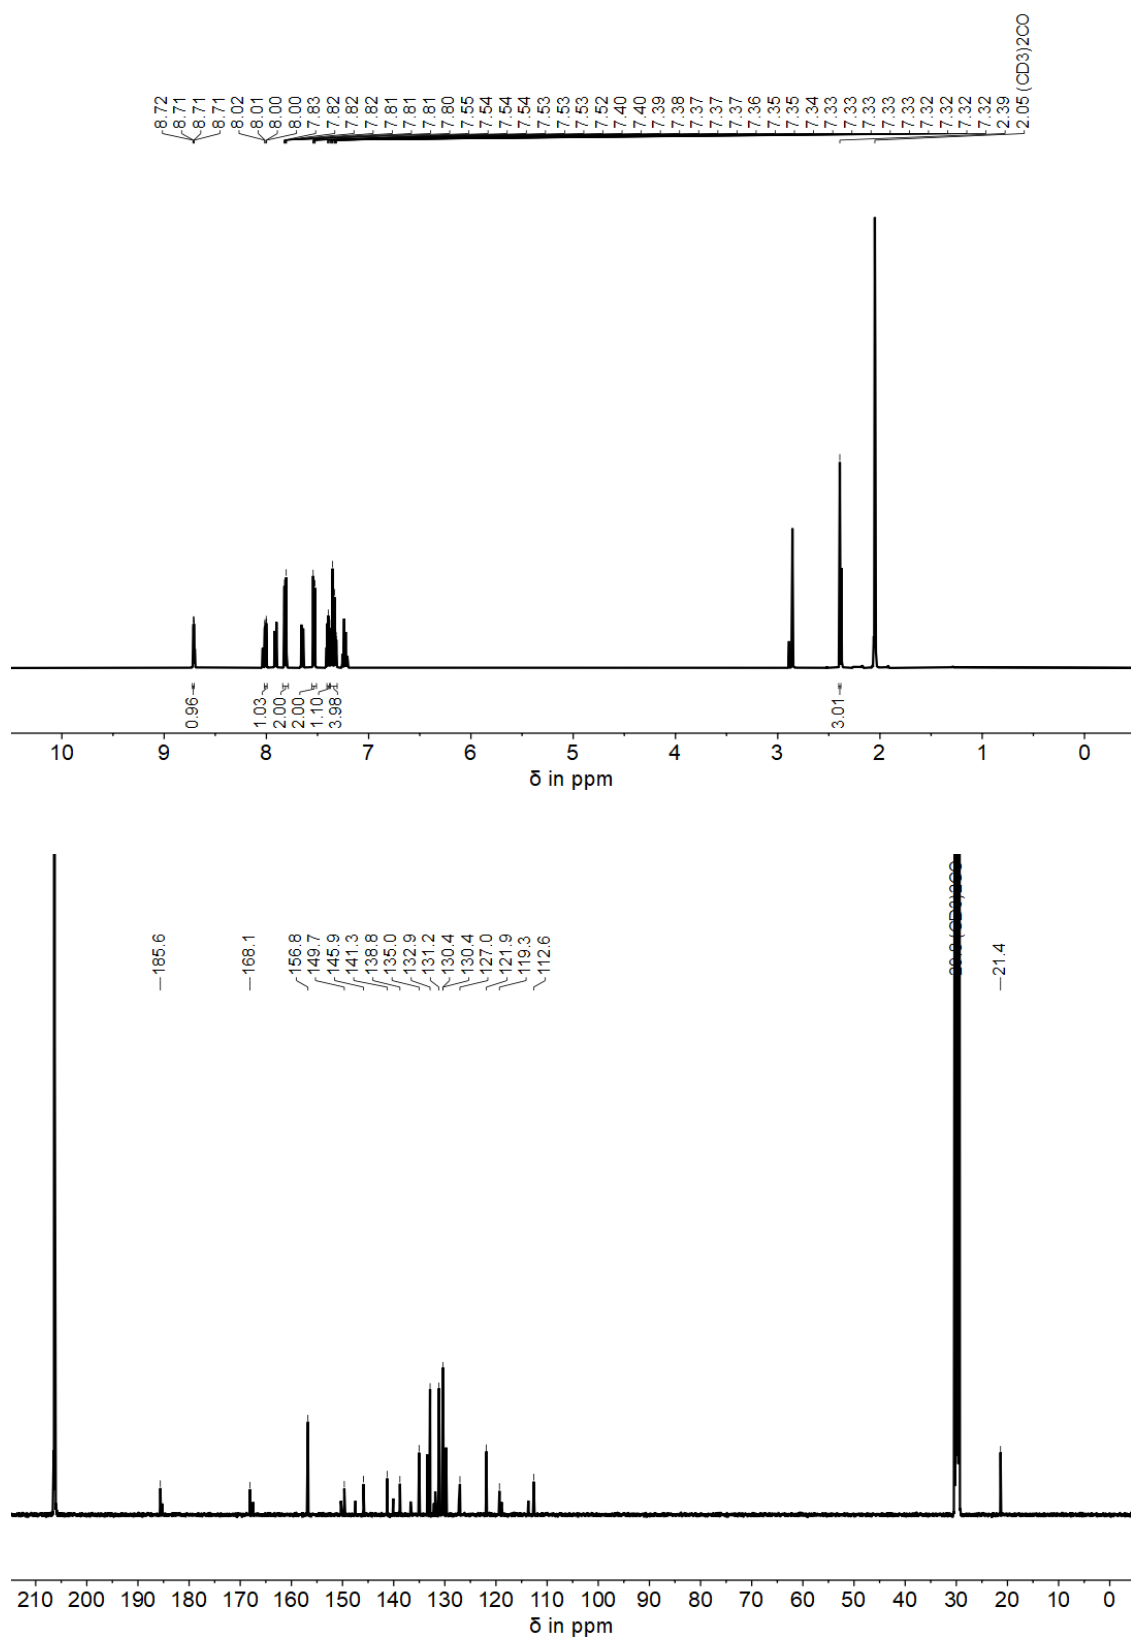

**Figure S55:** NMR spectra of diaryl-HTI **9** (mixture of *E* and *Z* isomer); <sup>1</sup>H NMR spectrum (500 MHz, (CD<sub>3</sub>)<sub>2</sub>CO, 23 °C) (top); <sup>13</sup>C NMR spectrum (126 MHz, (CD<sub>3</sub>)<sub>2</sub>CO, 23 °C) (bottom).

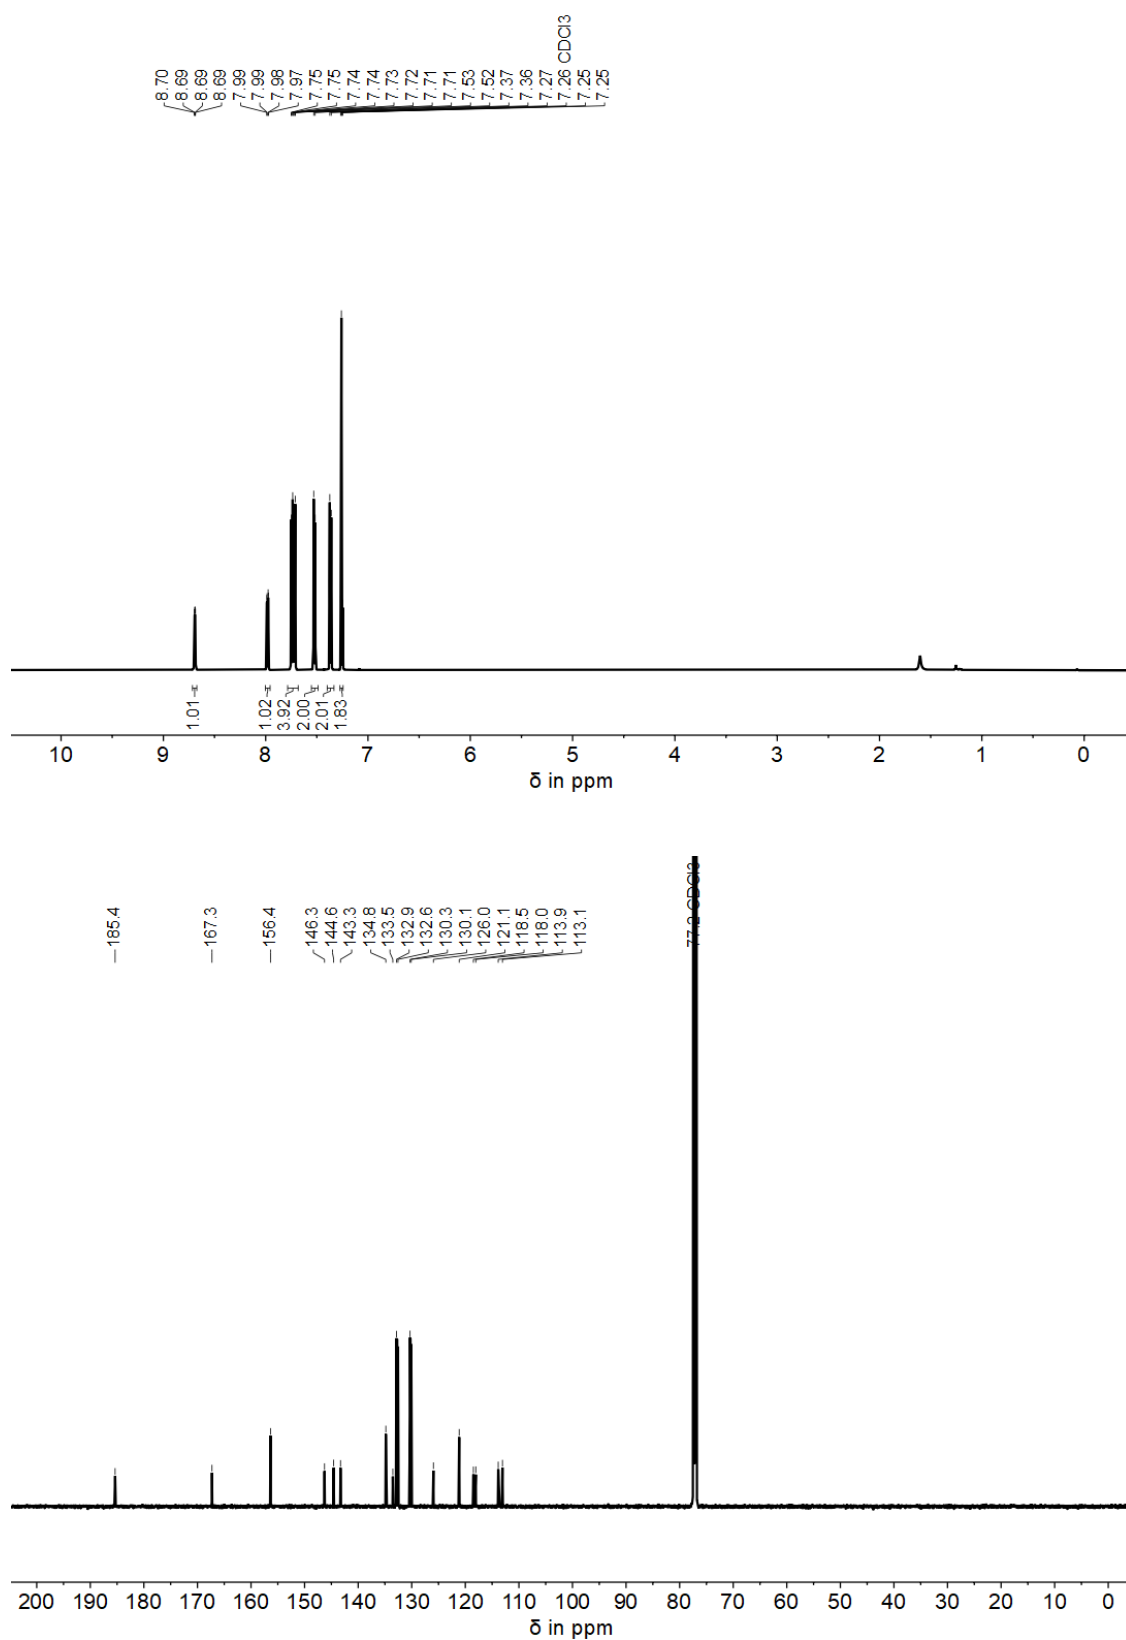

**Figure S56:** NMR spectra of diaryl-HTI **10**; <sup>1</sup>H NMR spectrum (601 MHz, CDCl<sub>3</sub>, 23 °C) (top); <sup>13</sup>C NMR spectrum (151 MHz, CDCl<sub>3</sub>, 23 °C) (bottom).

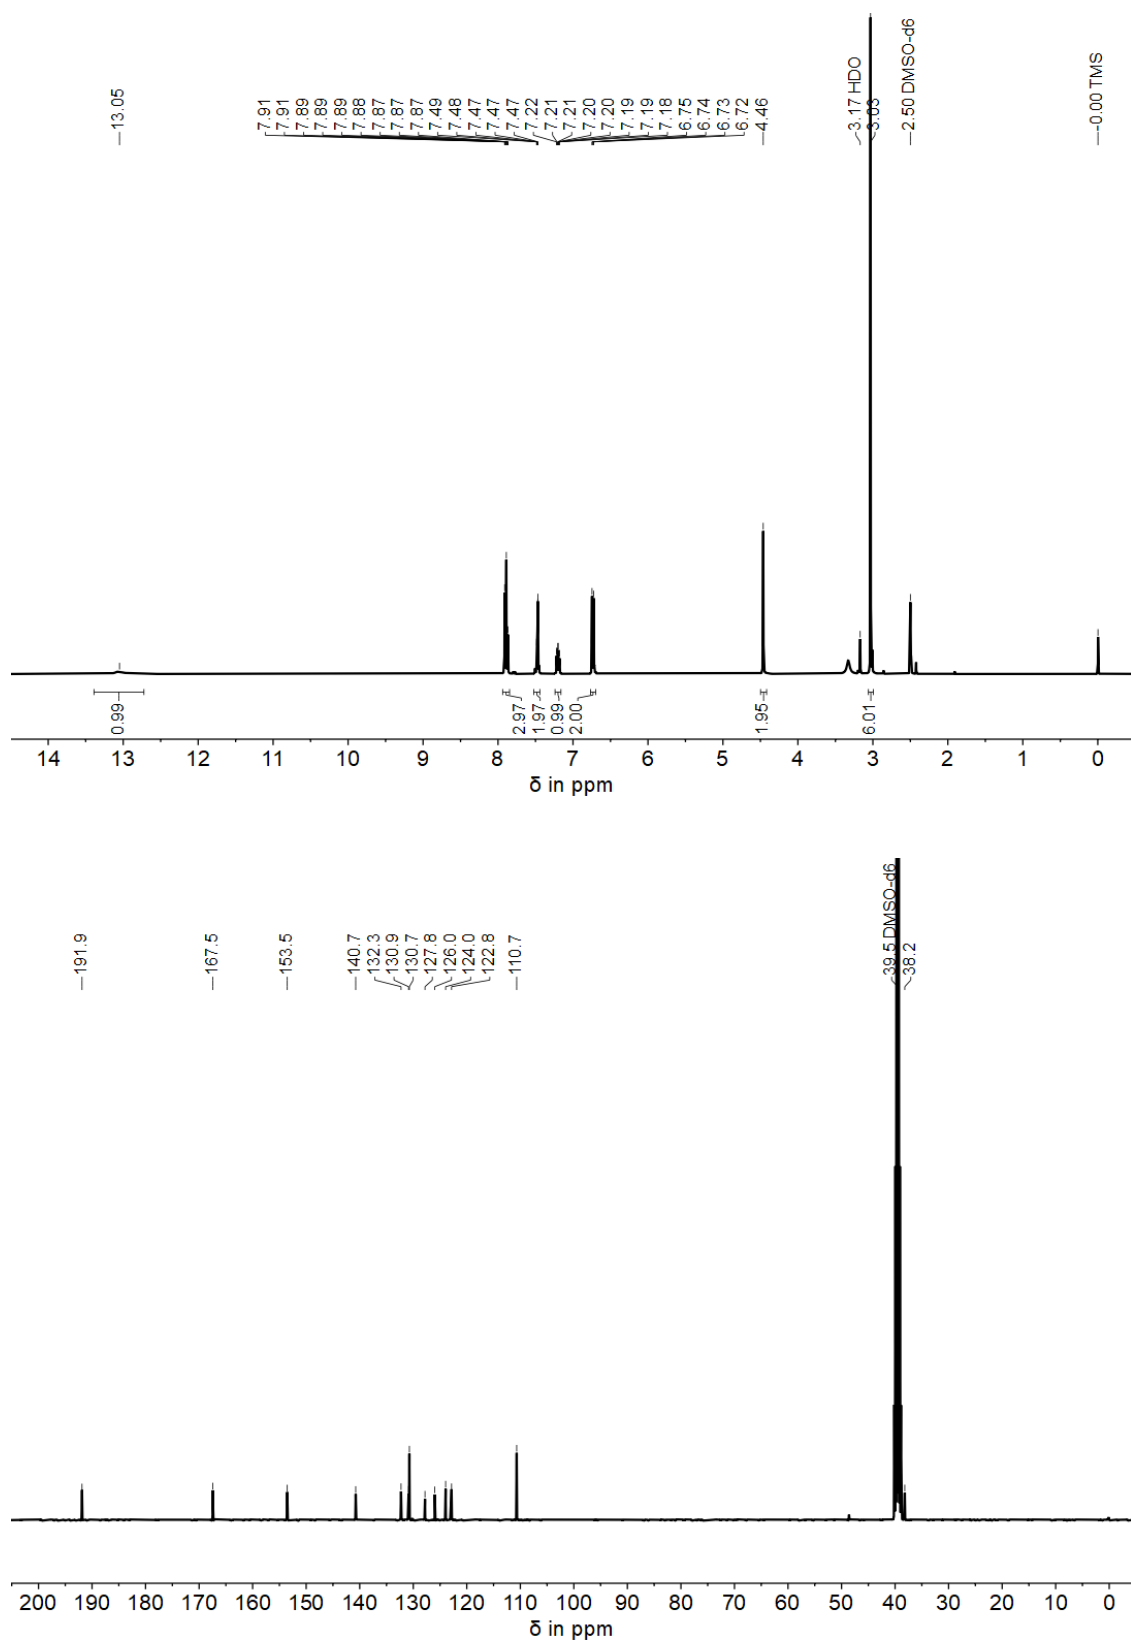

**Figure S57:** NMR spectra of compound **12**;  $^1\text{H}$  NMR spectrum (400 MHz,  $(\text{CD}_3)_2\text{SO}$ , 23  $^\circ\text{C}$ ) (top);  $^{13}\text{C}$  NMR spectrum (101 MHz,  $(\text{CD}_3)_2\text{SO}$ , 23  $^\circ\text{C}$ ) (bottom).

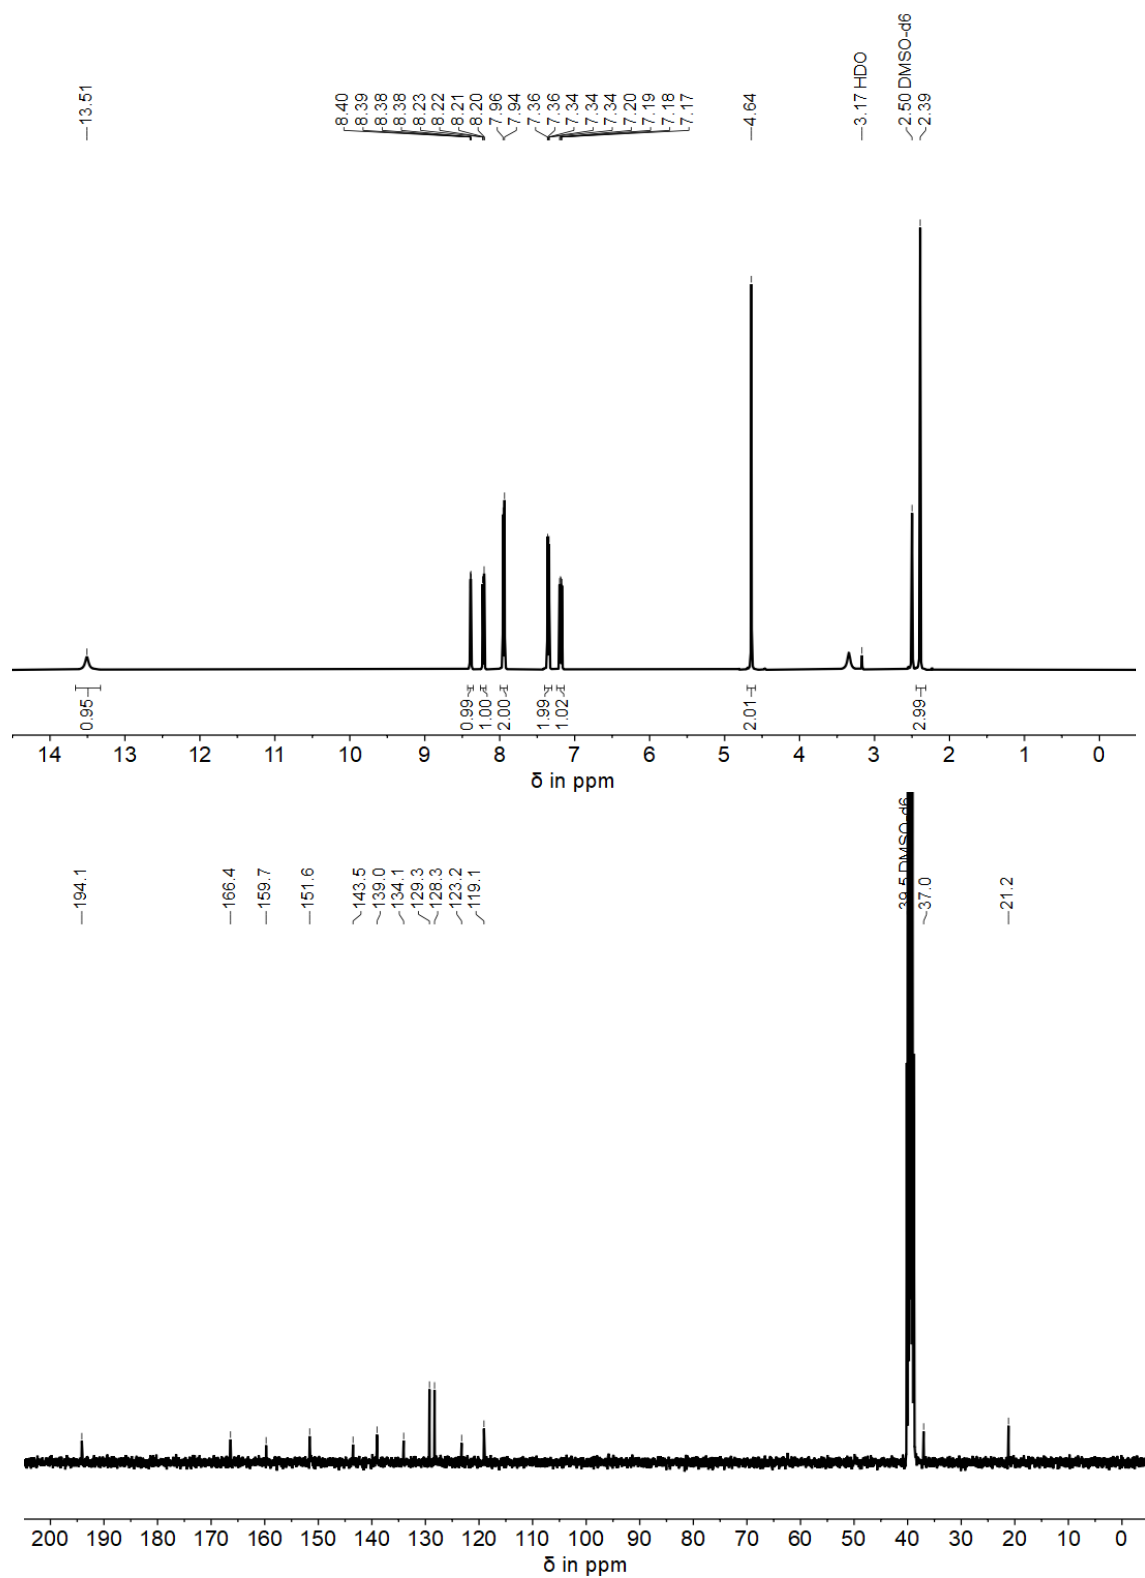

**Figure S58:** NMR spectra of compound **13**; <sup>1</sup>H NMR spectrum (400 MHz, (CD<sub>3</sub>)<sub>2</sub>SO, 23 °C) (top); <sup>13</sup>C NMR spectrum (101 MHz, (CD<sub>3</sub>)<sub>2</sub>SO, 23 °C) (bottom).

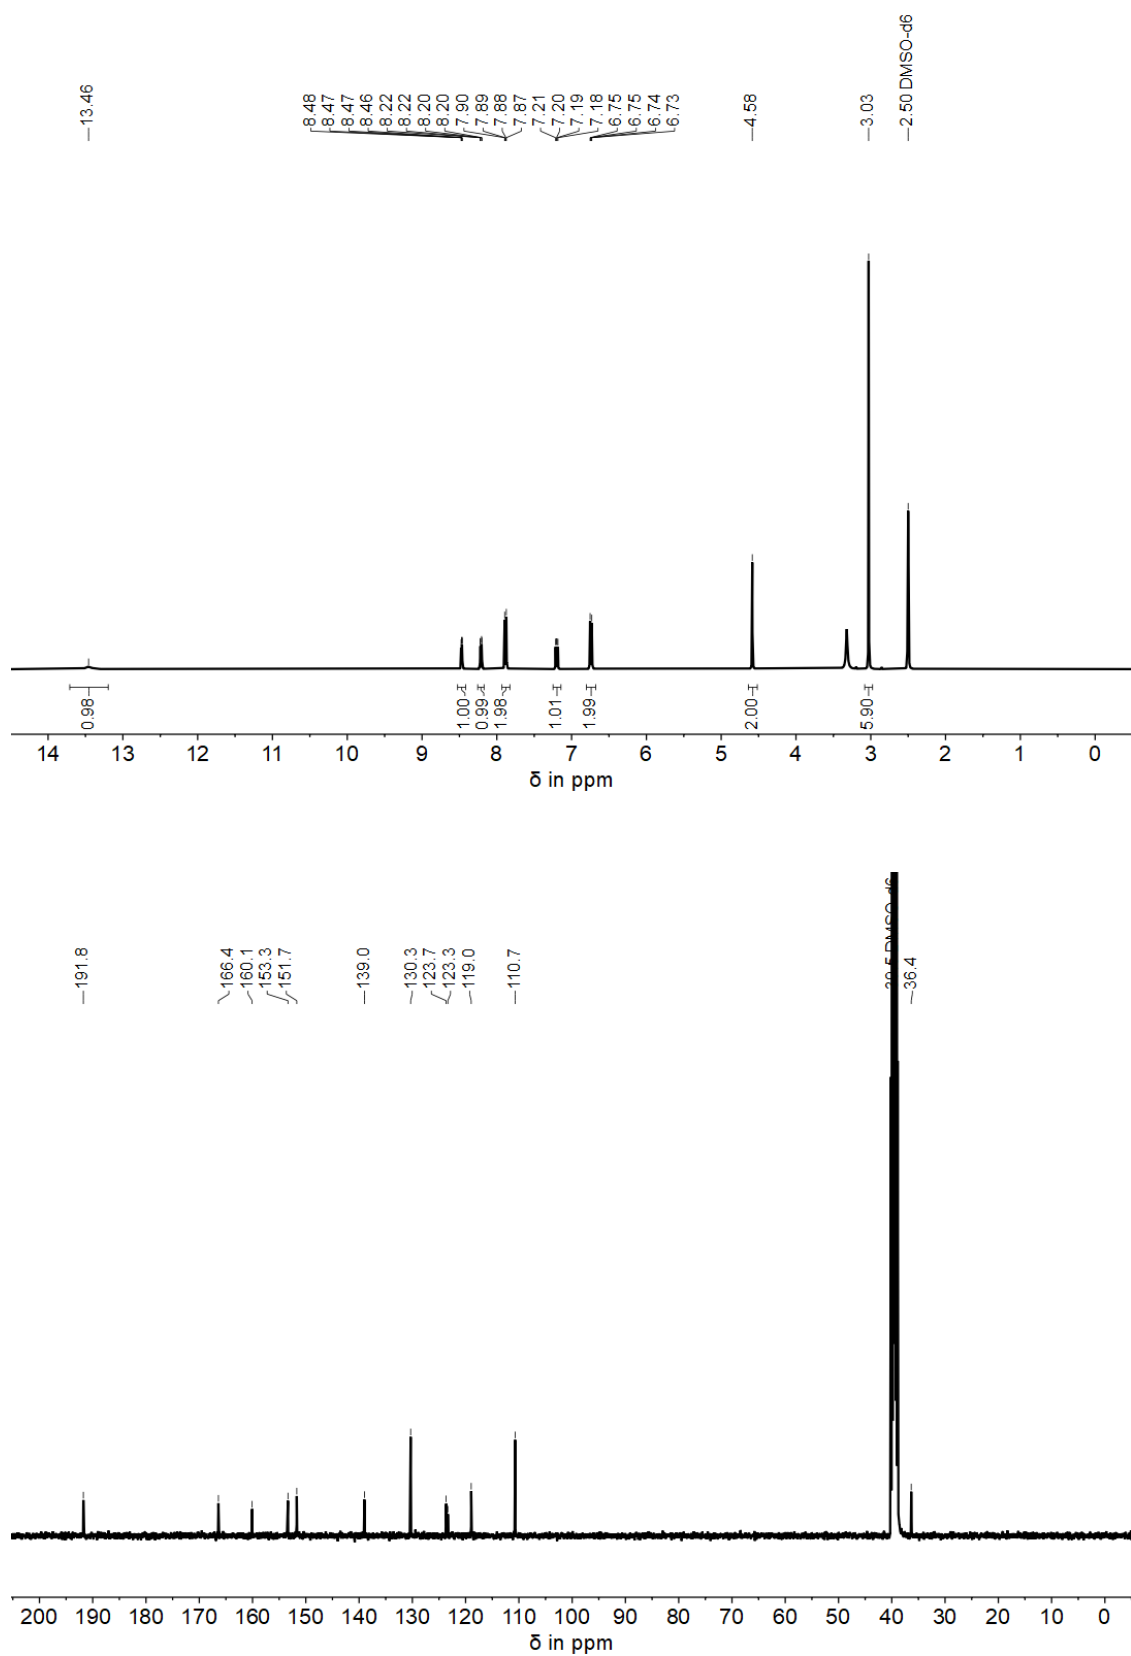

**Figure S59:** NMR spectra of compound **14**; <sup>1</sup>H NMR spectrum (400 MHz, (CD<sub>3</sub>)<sub>2</sub>SO, 23 °C) (top); <sup>13</sup>C NMR spectrum (101 MHz, (CD<sub>3</sub>)<sub>2</sub>SO, 23 °C) (bottom).

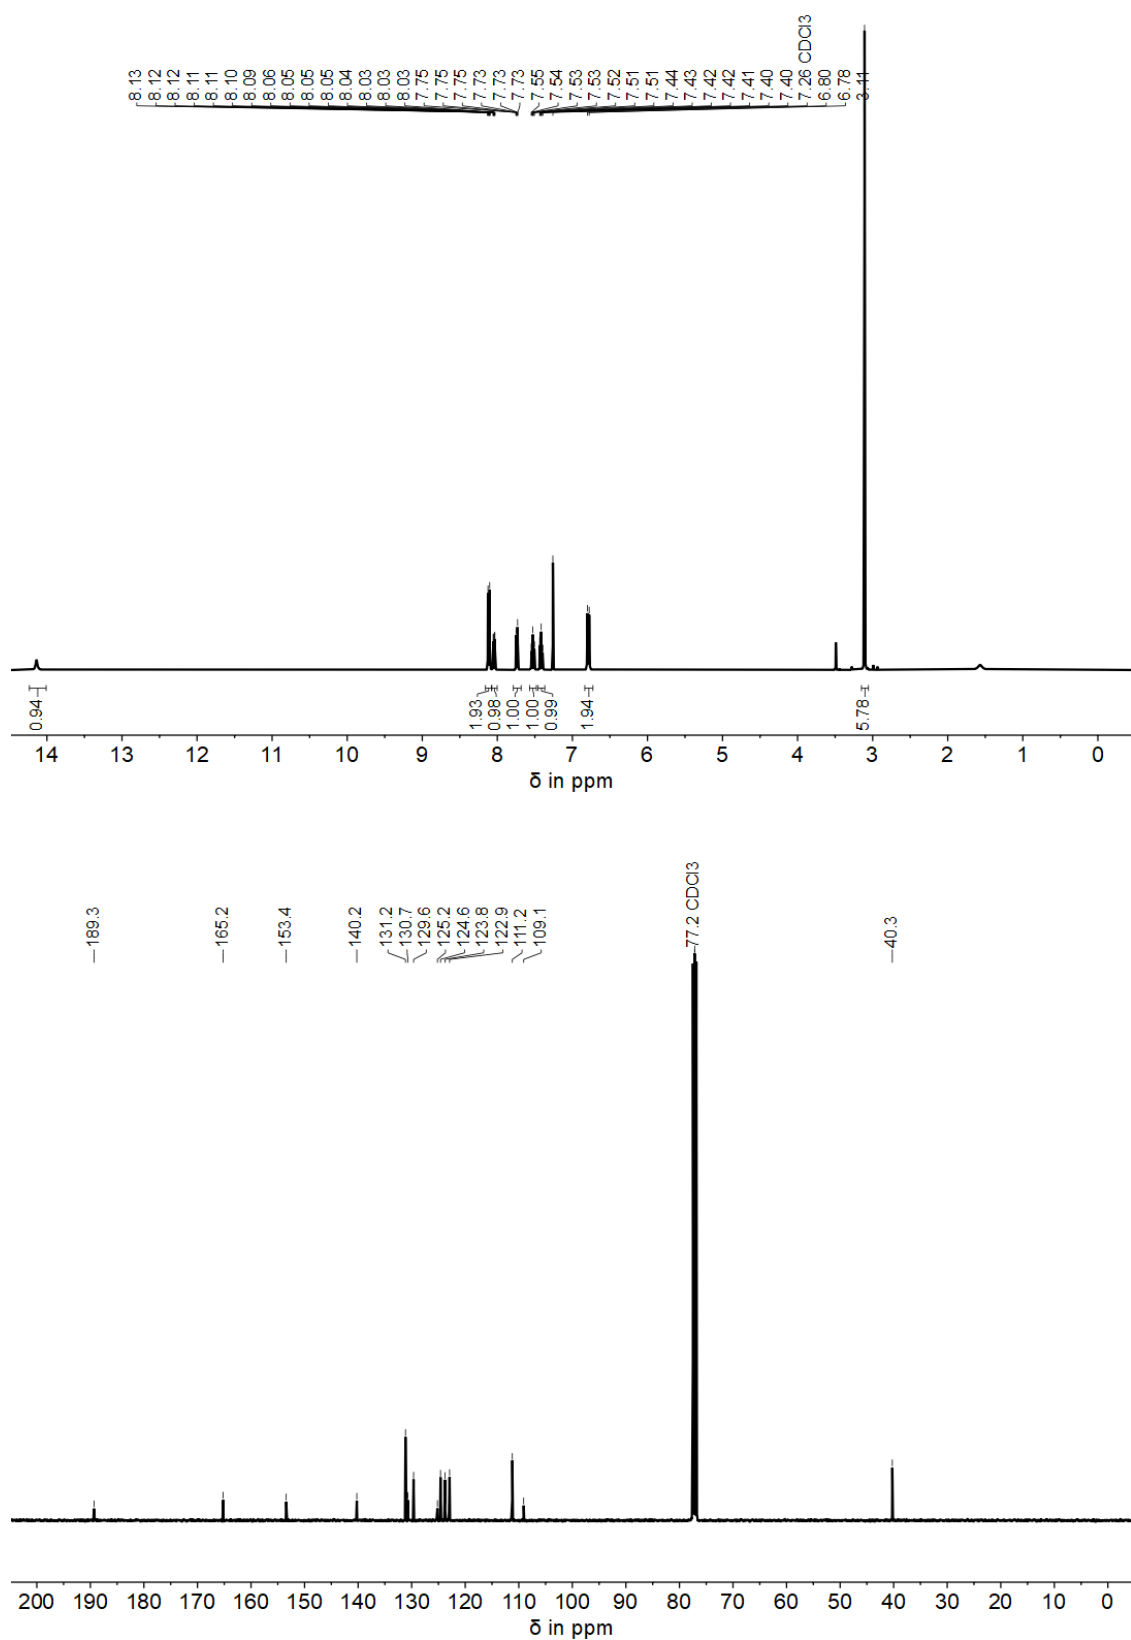

**Figure S60:** NMR spectra of compound **15**;  $^1\text{H}$  NMR spectrum (400 MHz,  $\text{CDCl}_3$ , 23  $^\circ\text{C}$ ) (top);  $^{13}\text{C}$  NMR spectrum (101 MHz,  $\text{CDCl}_3$ , 23  $^\circ\text{C}$ ) (bottom).

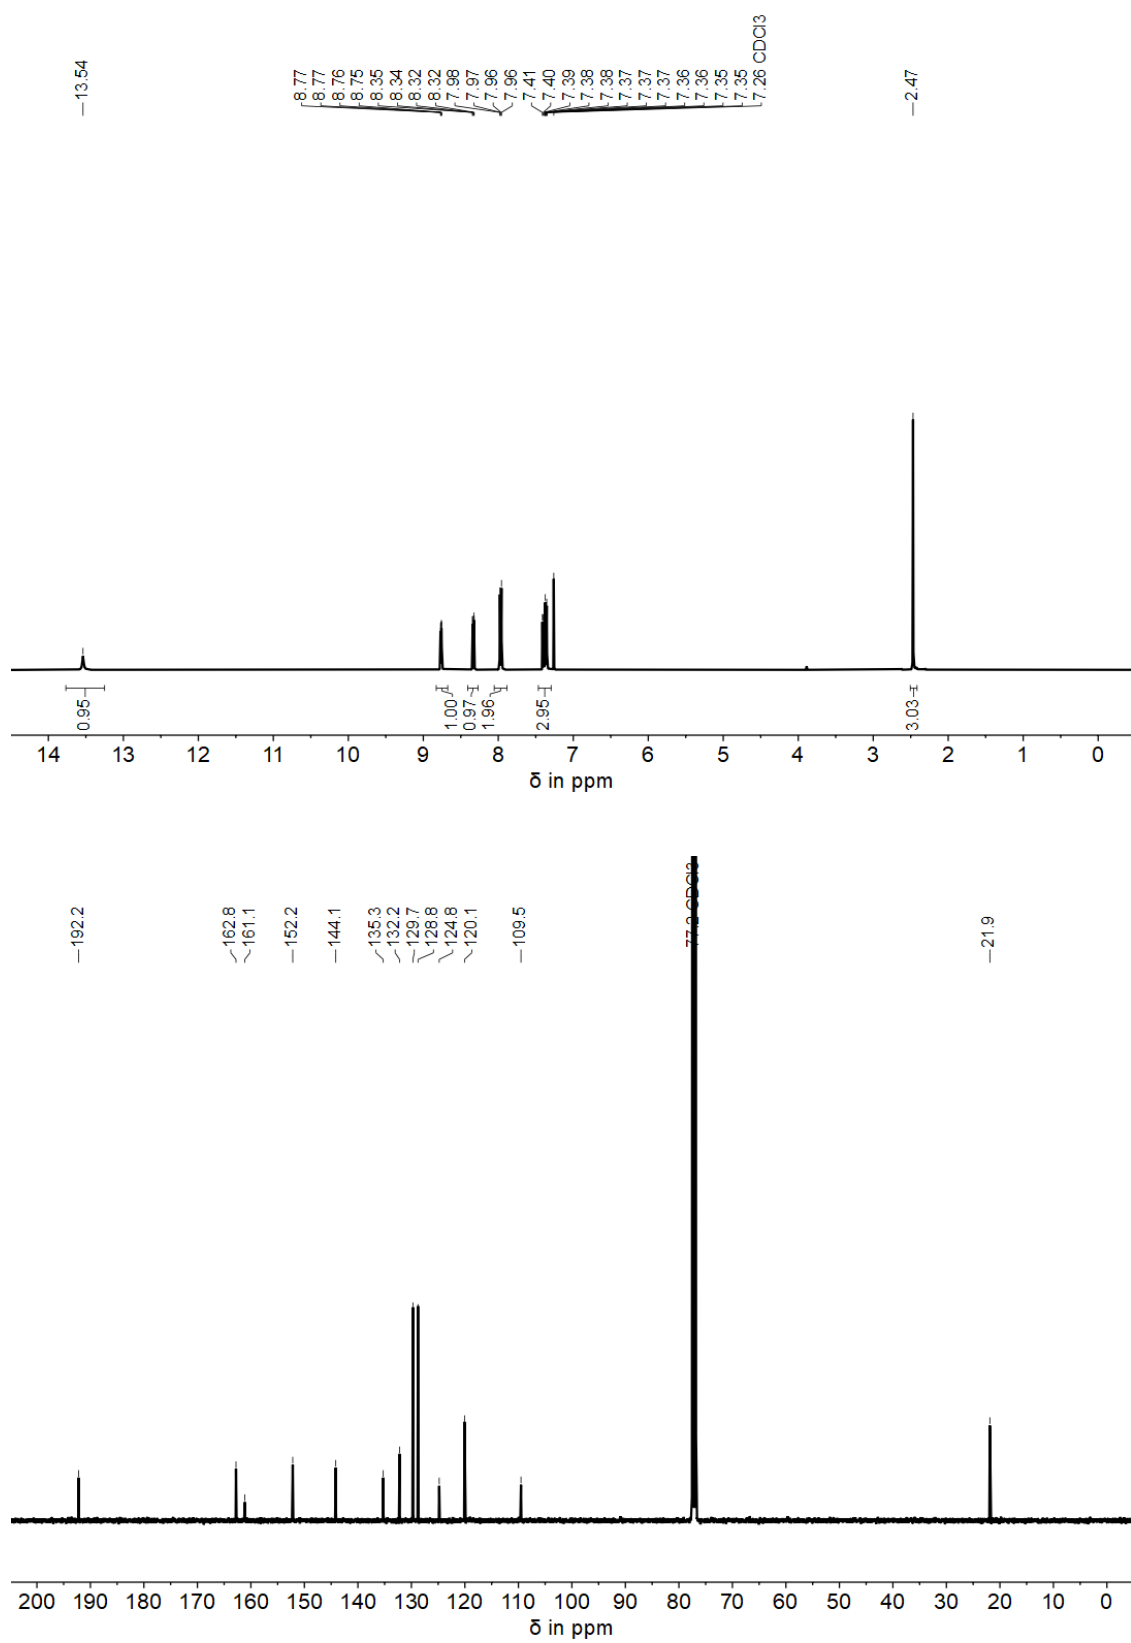

**Figure S61:** NMR spectra of compound **16**;  $^1\text{H}$  NMR spectrum (400 MHz,  $\text{CDCl}_3$ , 23  $^\circ\text{C}$ ) (top);  $^{13}\text{C}$  NMR spectrum (101 MHz,  $\text{CDCl}_3$ , 23  $^\circ\text{C}$ ) (bottom).

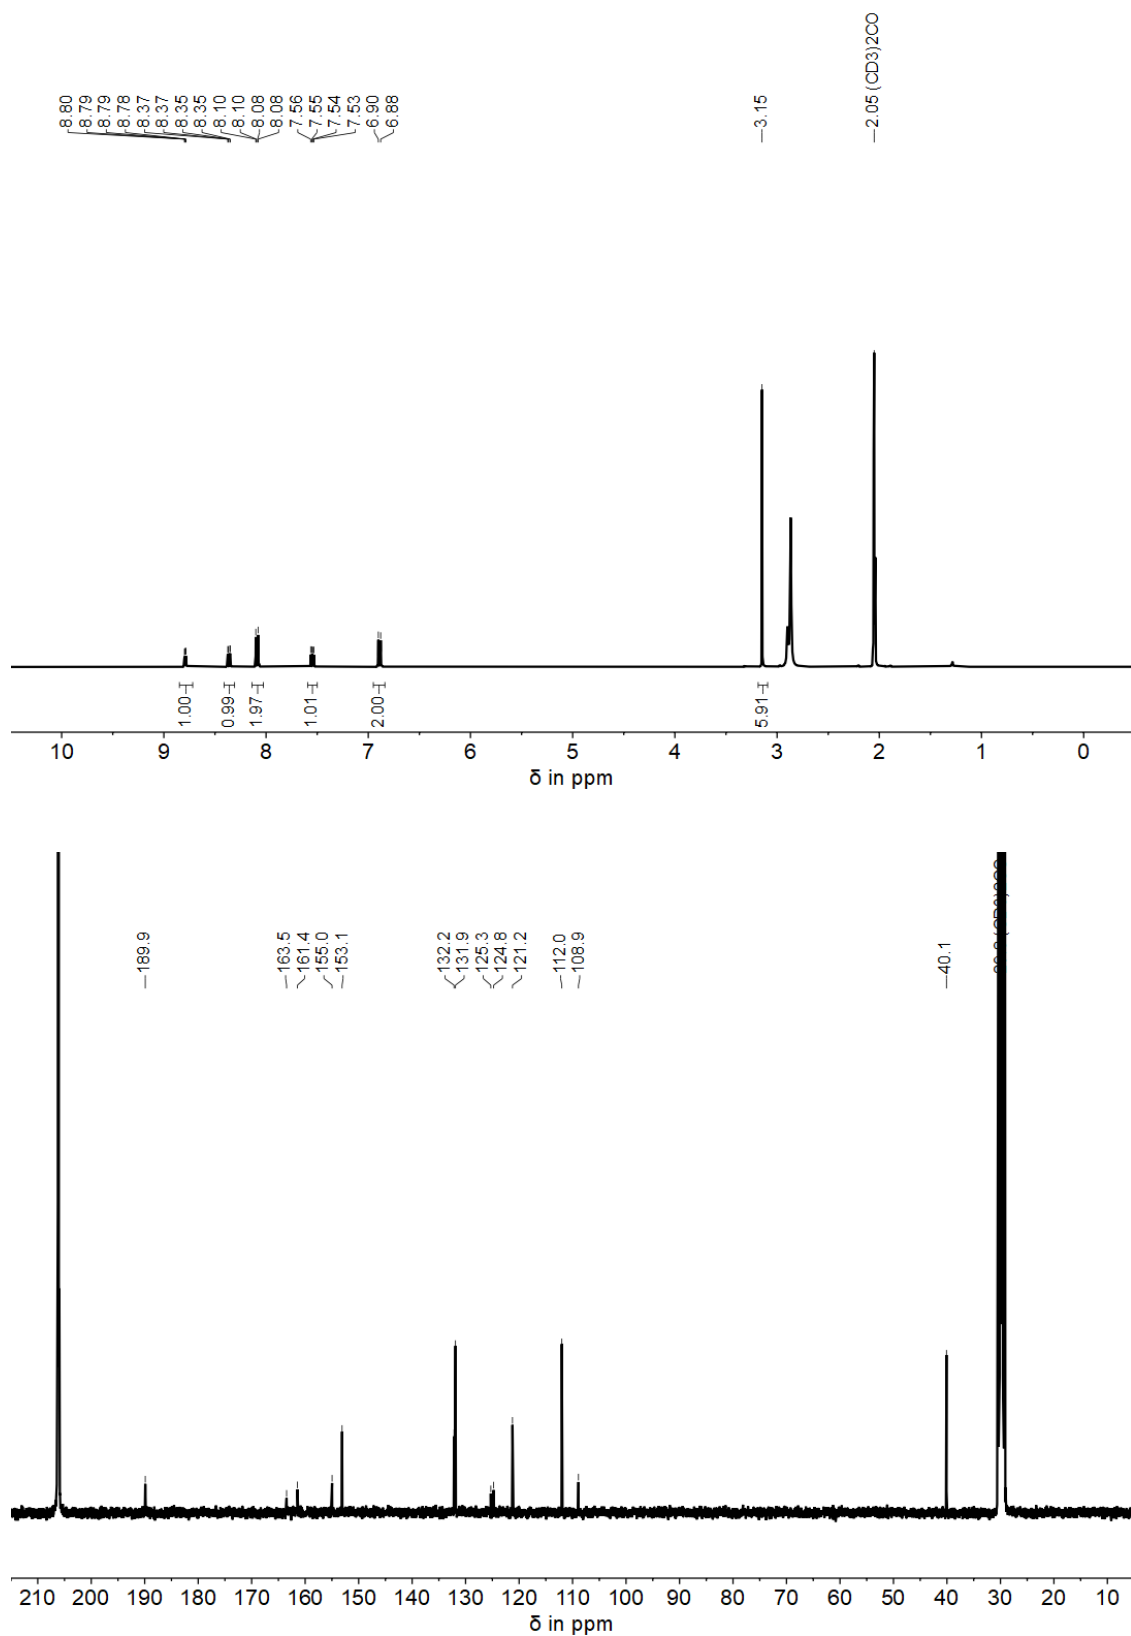

**Figure S62:** NMR spectra of compound **17**; <sup>1</sup>H NMR spectrum (400 MHz, (CD<sub>3</sub>)<sub>2</sub>CO, 23 °C) (top); <sup>13</sup>C NMR spectrum (101 MHz, (CD<sub>3</sub>)<sub>2</sub>CO, 23 °C) (bottom).

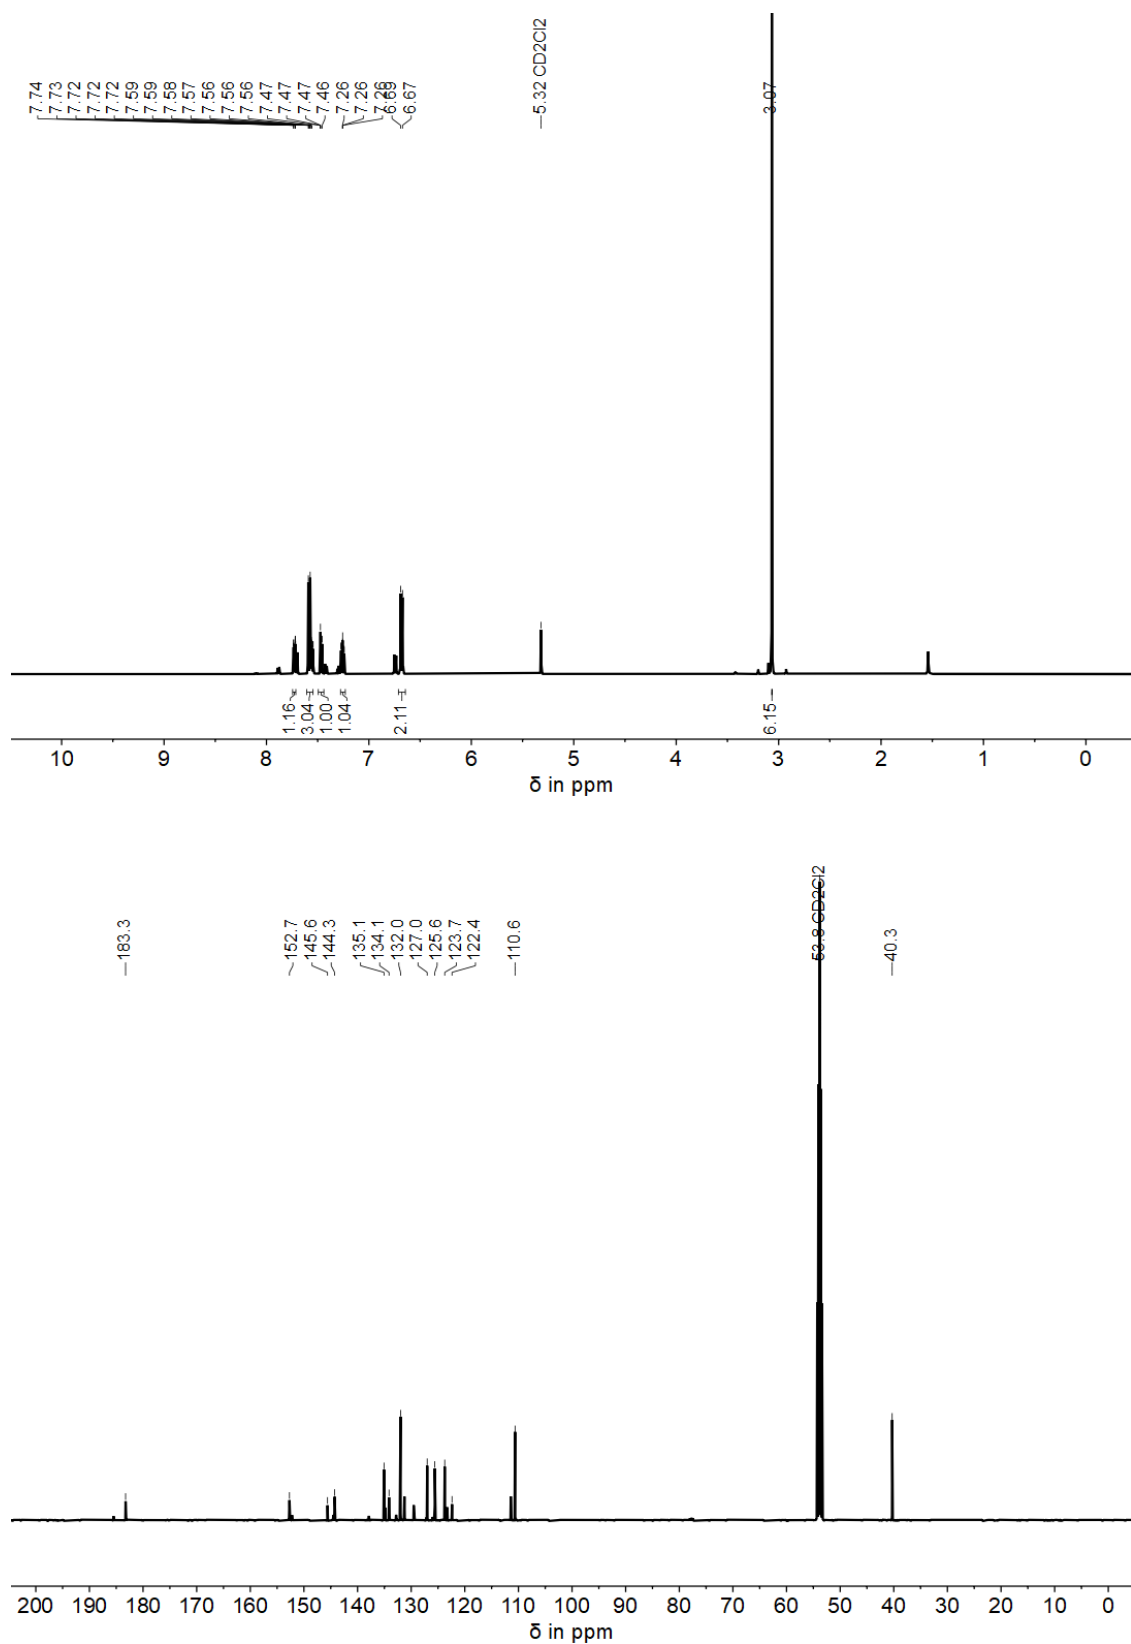

**Figure S63:** NMR spectra of compound **18** (mixture of *E* and *Z* isomer);  $^1\text{H}$  NMR spectrum (500 MHz,  $\text{CD}_2\text{Cl}_2$ , 23 °C) (top);  $^{13}\text{C}$  NMR spectrum (126 MHz,  $\text{CD}_2\text{Cl}_2$ , 23 °C) (bottom).

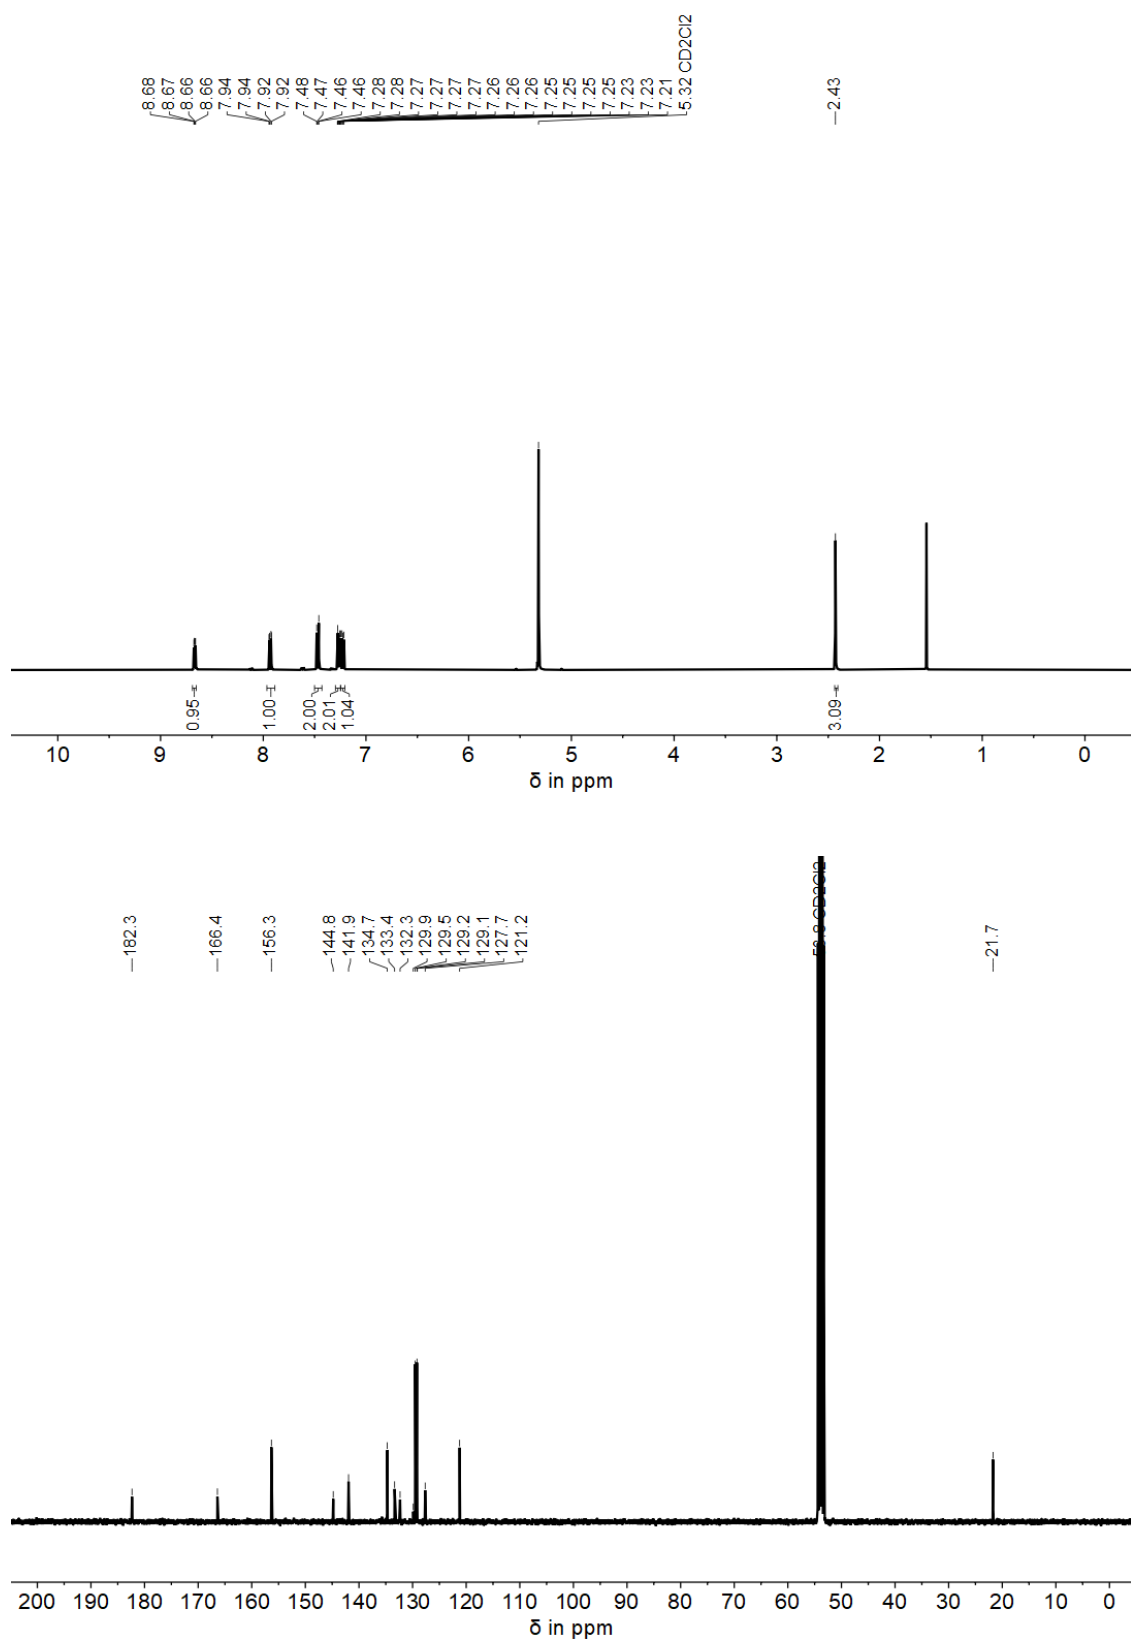

**Figure S64:** NMR spectra of compound **19**; <sup>1</sup>H NMR spectrum (400 MHz, CD<sub>2</sub>Cl<sub>2</sub>, 23 °C) (top); <sup>13</sup>C NMR spectrum (101 MHz, CD<sub>2</sub>Cl<sub>2</sub>, 23 °C) (bottom).

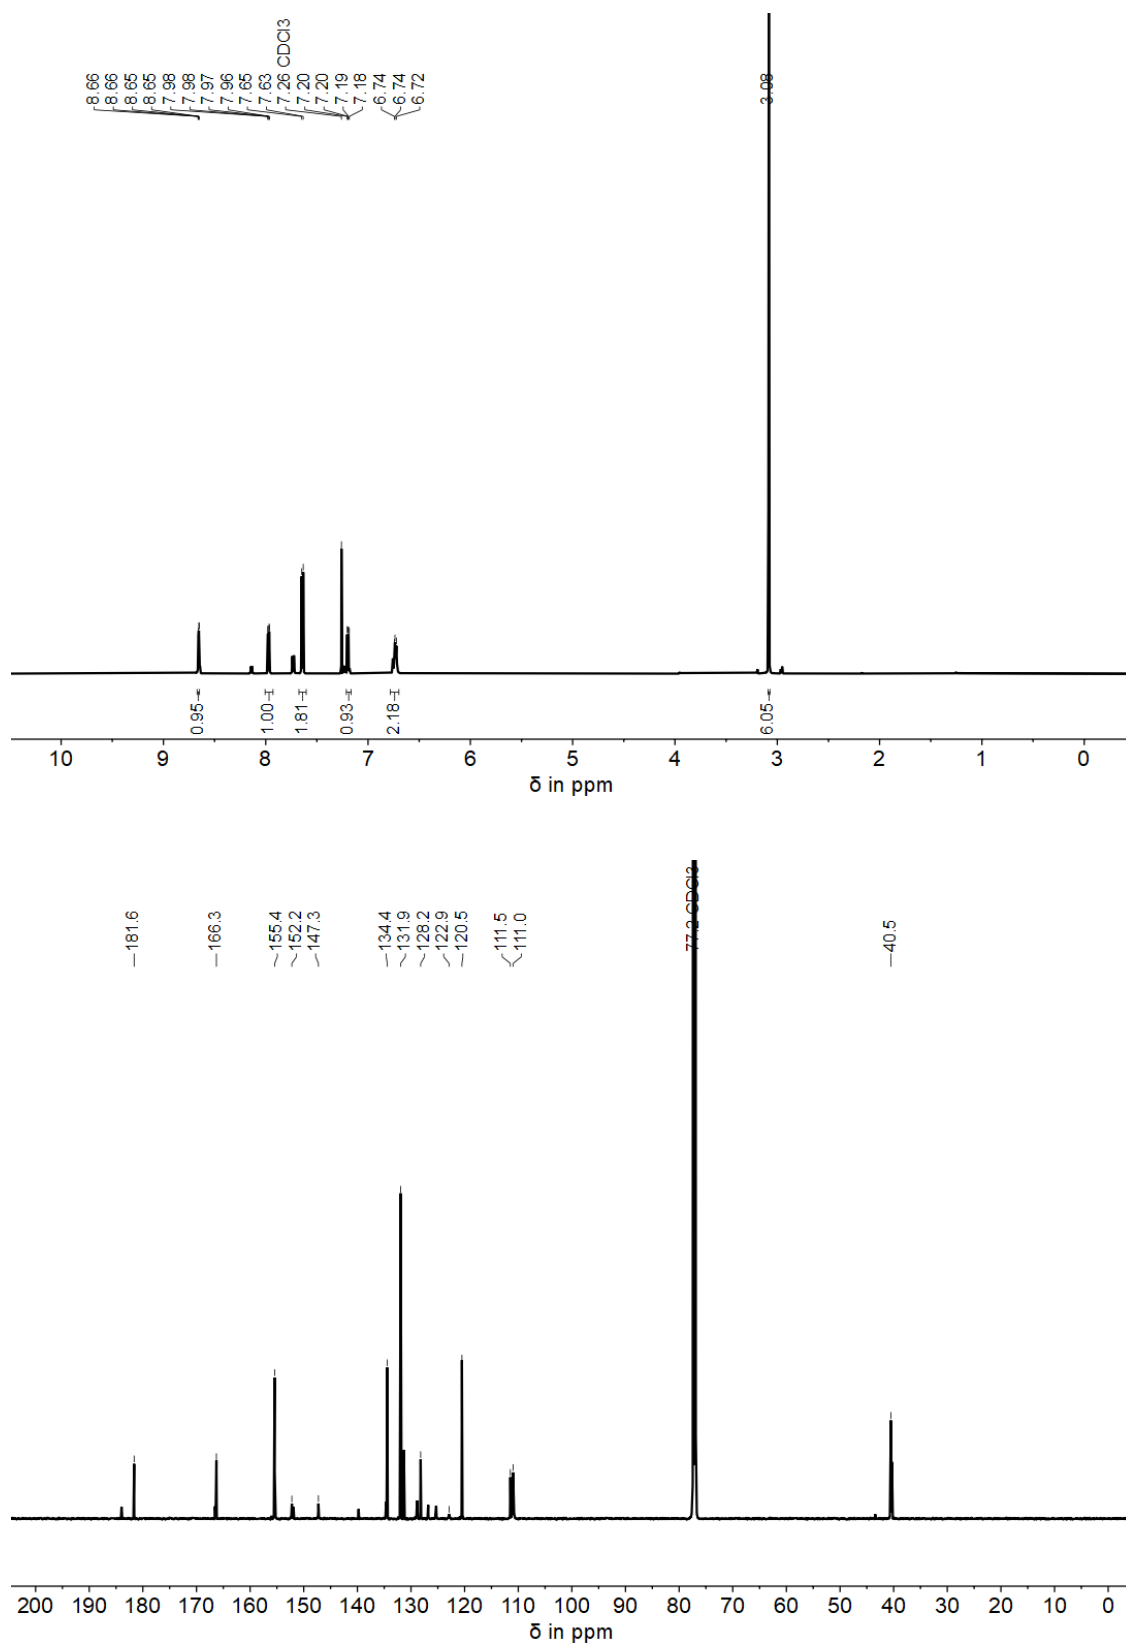

**Figure S65:** NMR spectra of compound **20** (mixture of *E* and *Z* isomer); <sup>1</sup>H NMR spectrum (601 MHz, CDCl<sub>3</sub>, 23 °C) (top); <sup>13</sup>C NMR spectrum (151 MHz, CDCl<sub>3</sub>, 23 °C) (bottom).

## References

- [1] G. R. Fulmer, A. J. M. Miller, N. H. Sherden, H. E. Gottlieb, A. Nudelman, B. M. Stoltz, J. E. Bercaw, K. I. Goldberg, *Organometallics* **2010**, 29, 2176.
- [2] A. Gerwien, T. Reinhardt, P. Mayer, H. Dube, *Organic Letters* **2018**, 20, 232.
- [3] L. C. King, G. K. Ostrum, *The Journal of Organic Chemistry* **1964**, 29, 3459.
- [4] J. E. Zweig, T. R. Newhouse, *Journal of the American Chemical Society* **2017**, 139, 10956.
- [5] B. Zhong, L. Sun, H. Shi, J. Li, C. Chen, Z. Chen, WO2017176812, **2017**.
- [6] H. Volfova, Q. Hu, Riedle Eberhard, *EPA Newsletter* **2019**, 51.
